# Supplementary material for: Rationale and design of a prospective substudy of clinical endpoint adjudication processes within an investigator-reported randomised controlled trial in patients with coronary artery disease: the GLOBAL LEADERS Adjudication Sub-StudY (GLASSY)
Source: PubMed Central journal article supplement — BMJ Open. 2019 Mar 9;9(3):e026053. doi: 10.1136/bmjopen-2018-026053 (PMC6429932; doi:10.1136/bmjopen-2018-026053), 2019-03-09
Supplement: bmjopen-2018-026053.draft_revisions.pdf [file bmjopen-2018-026053.draft_revisions.pdf]

# BMJ Open

BMJ Open is committed to open peer review. As part of this commitment we make the peer review history of every article we publish publicly available.

When an article is published we post the peer reviewers' comments and the authors' responses online. We also post the versions of the paper that were used during peer review. These are the versions that the peer review comments apply to.

The versions of the paper that follow are the versions that were submitted during the peer review process. They are not the versions of record or the final published versions. They should not be cited or distributed as the published version of this manuscript.

BMJ Open is an open access journal and the full, final, typeset and author-corrected version of record of the manuscript is available on our site with no access controls, subscription charges or pay-per-view fees (<http://bmjopen.bmj.com>).

If you have any questions on BMJ Open's open peer review process please email [editorial.bmjopen@bmj.com](mailto:editorial.bmjopen@bmj.com)

# BMJ Open

## Rationale and Design of the GLOBAL LEADERS Adjudication Sub-Study – GLASSY

|                               |                                                                                                                                                                                                                                                                                                                                                                                                                                                                                                                                                                                                                                                                                                                                                                                                                                                                                                                                                                                                                                                                                                                                                                                                                                                                                                                                                                                                                                                                                                                                                                                                                                                                                                                                                                                                                                                                                                                                                                                                                                                                                                                                                                                                                                                                                                                                                                                                                                                                                                       |
|-------------------------------|-------------------------------------------------------------------------------------------------------------------------------------------------------------------------------------------------------------------------------------------------------------------------------------------------------------------------------------------------------------------------------------------------------------------------------------------------------------------------------------------------------------------------------------------------------------------------------------------------------------------------------------------------------------------------------------------------------------------------------------------------------------------------------------------------------------------------------------------------------------------------------------------------------------------------------------------------------------------------------------------------------------------------------------------------------------------------------------------------------------------------------------------------------------------------------------------------------------------------------------------------------------------------------------------------------------------------------------------------------------------------------------------------------------------------------------------------------------------------------------------------------------------------------------------------------------------------------------------------------------------------------------------------------------------------------------------------------------------------------------------------------------------------------------------------------------------------------------------------------------------------------------------------------------------------------------------------------------------------------------------------------------------------------------------------------------------------------------------------------------------------------------------------------------------------------------------------------------------------------------------------------------------------------------------------------------------------------------------------------------------------------------------------------------------------------------------------------------------------------------------------------|
| Journal:                      | <i>BMJ Open</i>                                                                                                                                                                                                                                                                                                                                                                                                                                                                                                                                                                                                                                                                                                                                                                                                                                                                                                                                                                                                                                                                                                                                                                                                                                                                                                                                                                                                                                                                                                                                                                                                                                                                                                                                                                                                                                                                                                                                                                                                                                                                                                                                                                                                                                                                                                                                                                                                                                                                                       |
| Manuscript ID                 | bmjopen-2018-026053                                                                                                                                                                                                                                                                                                                                                                                                                                                                                                                                                                                                                                                                                                                                                                                                                                                                                                                                                                                                                                                                                                                                                                                                                                                                                                                                                                                                                                                                                                                                                                                                                                                                                                                                                                                                                                                                                                                                                                                                                                                                                                                                                                                                                                                                                                                                                                                                                                                                                   |
| Article Type:                 | Protocol                                                                                                                                                                                                                                                                                                                                                                                                                                                                                                                                                                                                                                                                                                                                                                                                                                                                                                                                                                                                                                                                                                                                                                                                                                                                                                                                                                                                                                                                                                                                                                                                                                                                                                                                                                                                                                                                                                                                                                                                                                                                                                                                                                                                                                                                                                                                                                                                                                                                                              |
| Date Submitted by the Author: | 19-Aug-2018                                                                                                                                                                                                                                                                                                                                                                                                                                                                                                                                                                                                                                                                                                                                                                                                                                                                                                                                                                                                                                                                                                                                                                                                                                                                                                                                                                                                                                                                                                                                                                                                                                                                                                                                                                                                                                                                                                                                                                                                                                                                                                                                                                                                                                                                                                                                                                                                                                                                                           |
| Complete List of Authors:     | <p>Leonardi, Sergio; Fondazione IRCCS Policlinico San Matteo, Franzone, Anna; Federico II University of Naples, Department of Advanced Biomedical Sciences<br/>         Piccolo, Raffaele; Federico II University of Naples, Department of Advanced Biomedical Sciences<br/>         McFadden, Eugene; Cork University Hospital Group, Department of Cardiology<br/>         Vranckx, Pascal; Hartcentrum Hasselt, Department of Cardiology and Critical Care Medicine<br/>         Serruys, Patrick; Imperial College of London, Department of Cardiology<br/>         Benit, Edouard; Jessa Hospital, Cardiology<br/>         Liebetrau, Christoph; Kerckhoff Heart and Thorax Centre, Cardiology<br/>         Janssens, Luc; Imelda Hospital, Cardiology<br/>         Ferrario, Maurizio; Fondazione IRCCS Policlinico San Matteo<br/>         Zurakowski, Aleksander; American Heart of Poland, Center of Cardiovascular Research and Development<br/>         van Geuns, Robert-Jan; Erasmus MC, Cardiology<br/>         Dominici, Marcello; S. Maria" University-Hospital, Cardiology<br/>         Huber, Kurt; Wilhelminenhospital, 3rd Med Dept, Cardiology and Emergency Medicine<br/>         Slagboom, Ton; OLVG, Cardiology<br/>         Buszman, Paweł; American Heart of Poland, Center for Cardiovascular Research and Development<br/>         Bolognese, Leonardo; Azienda Toscana USL Sudest, Cardiology<br/>         Tumscitz, carlo; Azienda Ospedaliero Universitaria di Ferrara Arcispedale Sant'Anna, Cardiology<br/>         Bryniarski, Krzysztof; The John Paul II Hospital, Jagiellonian University Medical College<br/>         Aminian, Adel; Centre hospitalier universitaire de Charleroi, Cardiology<br/>         Vrolix, Mathias; Ziekenhuis Oost-Limburg, Cardiology<br/>         Petrov, Ivo; Adzhibadem Siti Klinik Surdechno-sudovi Center, Cardiology<br/>         Garg, Scot; East Lancashire Hospitals NHS Trust, Cardiology<br/>         Naber, Christoph; Contilia Heart and Vascular Centre, Cardiology and Angiology<br/>         Prokopczuk, Janusz; PAKS Kozle, Cardiology<br/>         Hamm, Christian; Kerckhoff Heart Center,<br/>         Steg, Gabriel; Assistance Publique-Hôpitaux de Paris, Hôpital Bichat<br/>         Heg, Dierik; Institute of Social and Preventive Medicine and Clinical Trials Unit, CTU<br/>         Juni, Peter; Applied Health Research Centre, Li Ka Shing Knowledge Institute of St Michael's Hospital, Medicine</p> |

1  
2  
3  
4  
5  
6  
7  
8  
9  
10  
11  
12  
13  
14  
15  
16  
17  
18  
19  
20  
21  
22  
23  
24  
25  
26  
27  
28  
29  
30  
31  
32  
33  
34  
35  
36  
37  
38  
39  
40  
41  
42  
43  
44  
45  
46  
47  
48  
49  
50  
51  
52  
53  
54  
55  
56  
57  
58  
59  
60

|           |                                                                                                                                                   |
|-----------|---------------------------------------------------------------------------------------------------------------------------------------------------|
|           | Windecker, Stephan; Inselspital Universitatsspital Bern, Cardiology<br>Valgimigli, Marco; Inselspital Universitatsspital Bern, Cardiology         |
| Keywords: | Coronary heart disease < CARDIOLOGY, Coronary intervention < CARDIOLOGY, Ischaemic heart disease < CARDIOLOGY, Myocardial infarction < CARDIOLOGY |
|           |                                                                                                                                                   |

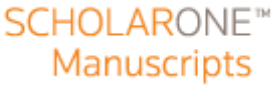

## Rationale and Design of the GLOBAL LEADERS Adjudication Sub-Study – GLASSY

Sergio Leonardi MD, MHS<sup>1,\*</sup>; Anna Franzone MD, PhD<sup>2,3,\*</sup>; Raffaele Piccolo MD, PhD<sup>2,3</sup>; Eugene McFadden MD<sup>4,5</sup>; Pascal Vranckx, MD, PhD<sup>6</sup>; Patrick W. Serruys MD, PhD<sup>7</sup>; Edouard Benit, MD<sup>8</sup>; Christoph Liebetrau, MD<sup>9</sup>; Luc Janssens, MD<sup>10</sup>; Maurizio Ferrario, MD<sup>1</sup>; Aleksander Zurakowski, MD<sup>11</sup>; Robert Jan van Geuns, MD<sup>12</sup>; Marcello Dominici, MD<sup>13</sup>; Kurt Huber, MD<sup>14</sup>; Ton Slagboom, MD<sup>15</sup>; Paweł Buszman, MD<sup>16</sup>; Leonardo Bolognese, MD<sup>17</sup>; Carlo Tumscitz, MD<sup>18</sup>; Krzysztof Bryniarski, MD, PhD<sup>19</sup>; Adel Aminian, MD<sup>20</sup>; Mathias Vrolix, MD<sup>21</sup>; Ivo Petrov, MD<sup>22</sup>; Scot Garg, MD<sup>23</sup>; Christoph Naber, MD<sup>24</sup>; Janusz Prokopczuk, MD<sup>25</sup>; Christian Hamm, MD<sup>26</sup>; Gabriel Steg, MD<sup>27</sup>; Dierik Heg, PhD<sup>28</sup>; Peter Juni, MD<sup>29</sup>; Stephan Windecker, MD<sup>2</sup>; Marco Valgimigli, MD, PhD<sup>2</sup>

*\*: These authors contributed equally to this manuscript.*

1: Fondazione IRCCS Policlinico S.Matteo, Pavia, Italy; 2: Department of Cardiology, Bern University Hospital, Bern, Switzerland; 3: Department of Advanced Biomedical Sciences, Federico II University of Naples, Naples, Italy; 4: Cardialysis Core Laboratories and Clinical Trial Management, Rotterdam, the Netherlands; 5: Department of Cardiology, Cork University Hospital, Cork, Ireland; 6: Department of Cardiology and Critical Care Medicine, Hartcentrum Hasselt, Jessa Ziekenhuis, Belgium; 7: Department of Cardiology, Imperial College of London, UK; 8: Jessa Hospital, Department of Cardiology, Hasselt, Belgium; 9: Department of Cardiology, Kerckhoff Heart and Thorax Center, Bad Nauheim, Germany; 10: Imelda Hospital, Bonheiden, Belgium; 11: Center of Cardiovascular Research and Development, American Heart of Poland, Katowice, Poland; 12: Thoraxcenter, Erasmus Medical Center, Rotterdam, the Netherlands; 13: S. Maria" University-Hospital, Terni, Italy; 14: 3rd Medical Department, Cardiology, Wilhelminenhospital, and Sigmund Freud University. Medical School, Vienna, Austria; 15: OLVG Amsterdam, Amsterdam, the Netherlands; 16: Center for Cardiovascular Research and Development American Heart of Poland, Poland; 17: Azienda Toscana Usl Sudest Arezzo Italy; 18: Cardiology Unit Sant'Anna Hospital, Ferrara, Italy; 19: Jagiellonian University Medical College, The John Paul II Hospital, Krakow, Poland; 20: Department of cardiology, Centre Hospitalier Universitaire de Charleroi, Charleroi, Belgium; 21: Ziekenhuis Oost Limburg, Genk, Belgium; 22: Acibadem City Clinic Cardiovascular Center, Sofia, Bulgaria; 23: East Lancashire Hospitals NHS Trust, Blackburn, UK; 24: Contilia Heart and Vascular

1  
2  
3 Centre, Department of Cardiology and Angiology, Elisabeth Krankenhaus Essen, Germany; 25: PAKS  
4 Kozle, Poland; 26: Department of Cardiology, Kerckhoff Heart and Thorax Center, Bad Nauheim,  
5 Germany; 27: Hôpital Bichat-Claude Bernard, Paris, France; 28: Institute of Social and Preventive  
6 Medicine and Clinical Trials Unit, University of Bern, Bern, Switzerland; 29: Applied Health Research  
7 Centre, Li Ka Shing Knowledge Institute of St Michael's Hospital, Department of Medicine, University of  
8 Toronto, Ontario, Canada  
9  
10  
11  
12  
13  
14

15 **Corresponding Author:**

16 Marco Valgimigli, MD, PhD  
17 Department of Cardiology  
18 Bern University Hospital,  
19 Freiburgstrasse 4, 3010 Bern  
20 Switzerland  
21 Phone: +41 316324714  
22 E-Mail: [marco.valgimigli@insel.ch](mailto:marco.valgimigli@insel.ch)  
23  
24  
25  
26  
27  
28  
29  
30  
31  
32  
33  
34  
35  
36  
37  
38  
39  
40  
41  
42  
43  
44  
45  
46  
47  
48  
49  
50  
51  
52  
53  
54  
55  
56  
57  
58  
59  
60

## Abstract (274 of 300 words)

**Introduction:** The GLOBAL LEADERS is an open-label, pragmatic and superiority randomized controlled trial designed to challenge the current treatment paradigm of dual antiplatelet therapy (DAPT) for 12 months followed by aspirin monotherapy among patients undergoing percutaneous coronary intervention (PCI). By design, all study endpoints are investigator-reported (IR) and not subject to formal adjudication by an independent Clinical Event Committee (CEC), which may introduce detection, reporting, or ascertainment bias.

**Methods and Analysis:** We designed the GLOBAL LEADERS Adjudication Sub-Study (GLASSY) to prospectively implement, in a large sample of patients enrolled within the GLOBAL LEADERS trial (7,601 of 15,991, 47.5%), an independent adjudication process of reported and unreported potential endpoints, using standardized CEC procedures, in order to assess whether 23-month ticagrelor monotherapy (90 mg BID) after 1-month DAPT is non-inferior to a standard regimen of DAPT for 12 months followed by aspirin monotherapy for the primary efficacy endpoint of death, non-fatal myocardial infarction, non-fatal stroke, or urgent target-vessel revascularization, and superior for the primary safety endpoint of type 3 or 5 bleeding according to the Bleeding Academic Research Consortium (BARC) criteria.

This study will comprehensively assess the comparative safety and efficacy of the two tested antithrombotic strategies on CEC-adjudicated ischemic and bleeding endpoints and will provide insights into the role of a standardized CEC adjudication process on the interpretation of study findings by quantifying the level of concordance between IR-reported and CEC-adjudicated events.

**Ethics and Dissemination:** GLASSY is designed to complement the interpretation of the results of the GLOBAL LEADERS trial on a CEC-adjudicated broad range of non-fatal ischemic and bleeding endpoints, and, ultimately, test the value of standardized CEC processes within a pragmatic study design.

Clinical trial registration information: NCT01813435. Accessed at <https://www.clinicaltrials.gov/> on March, 6<sup>th</sup> 2018.

## Strengths and limitations of this study

- GLASSY is a comprehensive, rigorous, and standardized assessment of several non-fatal endpoints in a representative sample of the GLOBAL LEADERS trial performed according to best practices of adjudication.
- An intrinsic limitation is that GLOBAL LEADERS has been designed as an IR-only study. Therefore, systematic identification of study endpoints is limited by the eCRF and relies on source documentation provided by the site, which reduces the ability to identify all possible potential endpoints.
- For feasibility, GLASSY will be conducted in a sample rather than the entire parent study, which may bias the study toward the null hypothesis of no difference between IR- and CEC-adjudicated endpoint by selecting best enrolling sites. While this bias is possible, the relatively large study sample ( $\approx 50\%$  of the parent study) makes this possibility unlikely.

## Rationale

The prolonged combination of aspirin and a P2Y<sub>12</sub> receptor inhibitor, typically for 12 months, represents the established antiplatelet therapy in patients with or without acute coronary syndrome (ACS) undergoing percutaneous coronary intervention (PCI) with drug-eluting stent implantation.<sup>1</sup> Clopidogrel, an inconsistent P2Y<sub>12</sub> receptor inhibitor<sup>2</sup> with considerable variability in inter-patient response,<sup>3</sup> proved inferior to stronger and more consistent P2Y<sub>12</sub> inhibitors, such as ticagrelor, in preventing ischemic and thrombotic cardiovascular events among patients with ACS.<sup>4</sup> With the introduction and widespread adoption in clinical practice of more potent P2Y<sub>12</sub> inhibitors, it has been hypothesized that the addition of aspirin may yield little additional inhibition of platelet aggregation and marginal incremental clinical benefit compared with a strategy based on potent P2Y<sub>12</sub> receptor inhibitor-monotherapy.<sup>5,6</sup> This led to the hypothesis that ticagrelor monotherapy may have similar efficacy compared with the combination of aspirin and ticagrelor and be better tolerated.

1  
2  
3 The GLOBAL LEADERS trial was designed to challenge the current treatment  
4 paradigm consisting of 12-month dual antiplatelet therapy (DAPT; clopidogrel+aspirin  
5 among patients with stable CAD; ticagrelor+aspirin among patients with ACS) followed  
6 by aspirin monotherapy in patients undergoing PCI based on the superiority for the  
7 composite endpoint of all-cause death or Q-wave myocardial infarction (MI) assessed at  
8 2 years.<sup>7</sup> It is an open-label, randomized comparison testing an innovative antithrombotic  
9 regimen of 23-month ticagrelor 90 mg twice daily monotherapy after 1-month DAPT  
10 (ticagrelor 90 mg twice daily plus low-dose aspirin) against conventional 12-month  
11 DAPT in all-comer patients undergoing PCI with bivalirudin-supported, biolimus-eluting  
12 stent implantation. The GLOBAL LEADERS is a pragmatic clinical trial and, by design,  
13 all study endpoints are investigator-reported (IR) and therefore not adjudicated by an  
14 independent Clinical Event Committee (CEC). Only new Q-wave MI will be identified  
15 by independent core lab assessment and validated by a physician blinded to treatment  
16 allocation. All other endpoints, including specific causes of mortality, non-Q wave MI,  
17 stroke, stent thrombosis, and bleeding will be analyzed as reported by the local  
18 investigators.  
19  
20  
21  
22  
23  
24  
25  
26  
27  
28  
29  
30

31 Although the use of IR endpoints in a phase III randomized trial is a simple and  
32 less expensive alternative, their sole use has potential to introduce detection, reporting, or  
33 ascertainment bias, especially in the absence of blinding to randomized treatment (i.e. in  
34 an open-label design as in the case of the GLOBAL LEADERS trial). This might  
35 challenge the interpretation of the GLOBAL LEADERS study results, especially as it  
36 relates to the effect of the randomly allocated treatment on non-fatal clinical endpoints.  
37 Moreover, the design of GLOBAL LEADERS also raises important questions regarding  
38 bleeding adverse events that may differ between groups.  
39  
40  
41  
42  
43  
44

45 We, therefore, designed the GLOBAL LEADERS Adjudication Sub-Study  
46 (GLASSY) with the aim to prospectively implement, in a representative sample of  
47 patients enrolled within the GLOBAL LEADERS trial, an independent adjudication  
48 process of reported as well as unreported potential endpoints, leveraging on standardized  
49 CEC procedures. This GLASSY substudy is powered to test whether 23-month ticagrelor  
50 monotherapy after a short course of DAPT for 1 month is non-inferior to conventional  
51 12-month DAPT followed by aspirin monotherapy with respect to CEC-adjudicated  
52  
53  
54  
55  
56  
57  
58  
59  
60



1  
2  
3 death, non-fatal myocardial infarction, non-fatal stroke, or urgent target-vessel  
4 revascularization (TVR) and superior in preventing CEC-adjudicated major bleeding.  
5 Furthermore, GLASSY will evaluate the implications of the CEC adjudication process  
6 for the interpretation of study results by quantifying the level of concordance between IR-  
7 reported and CEC-adjudicated events and will define the role of CEC adjudication  
8 process for the assessment of the efficacy and safety of the randomized antithrombotic  
9 strategies on a broader set of fatal and non-fatal clinical endpoints.  
10  
11  
12  
13  
14  
15

## 16 17 **Design**

### 18 19 **Parent Study**

20  
21 The GLOBAL LEADERS study is a superiority, open-label, multicenter, randomized  
22 controlled trial in an all-comer population of patients, presenting with ACS or stable  
23 coronary artery disease, undergoing PCI with the uniform use of Biolimus A9-eluting  
24 stents (BioMatrix™ BES; Biosensors Europe SA, Morges, Switzerland) and receiving  
25 bivalirudin at the time of the index procedure (**Figure 1**). A total of 15,991 patients have  
26 been randomly assigned 1:1 to ticagrelor 90 mg twice daily for 24 months plus aspirin  
27  $\leq 100$  mg daily for 1 month (experimental arm) or standard DAPT with either ticagrelor,  
28 in case of ACS, or clopidogrel, in case of stable coronary artery disease, for 12 months  
29 plus aspirin  $\leq 100$  mg daily for 24 months (control arm). All study endpoints are  
30 investigator-reported with randomization stratified by enrolling site as well as clinical  
31 presentation. The primary endpoint of the GLOBAL LEADERS is the composite of all-  
32 cause death or new Q-wave myocardial infarction at 24 months. The presence and date of  
33 new Q wave MI will be identified by an independent ECG core laboratory and validated  
34 by a single physician blinded to treatment allocation using adverse events reported in the  
35 eCRF supplemented, if required, by additional source documents. The key safety  
36 endpoint is investigator-reported class 3 or 5 bleeding according to the Bleeding  
37 Academic Research Consortium (BARC) definitions. Other secondary endpoints include  
38 stroke, MI, coronary revascularization, and definite stent thrombosis. As pragmatic trial,  
39 GLOBAL LEADERS implemented a risk-based monitoring process for site-based  
40  
41  
42  
43  
44  
45  
46  
47  
48  
49  
50  
51  
52  
53  
54  
55  
56  
57  
58  
59  
60

operational activities favoring centralized remote monitoring rather than in-person on-site monitoring. GLOBAL LEADERS terminated enrollment on November, 9<sup>th</sup> 2015.

## Objectives

The primary objective of the GLASSY is to assess, in a representative subgroup of patients enrolled within the GLOBAL LEADERS study, whether 23-month ticagrelor monotherapy after a short course of DAPT (1 month) is non-inferior to conventional 12-month DAPT followed by aspirin monotherapy for the composite endpoint of CEC-adjudicated all-cause death, non-fatal MI, non-fatal stroke, or urgent TVR, and superior in preventing CEC-adjudicated major bleeding (BARC type 3 and 5) in an all-comers population undergoing PCI at 24 months (**Figure 2**). A secondary objective is to quantify the level of concordance between IR- and CEC-adjudicated endpoints.

## Endpoints

GLASSY will have two independent, CEC-adjudicated, co-primary endpoints at 24 months:

- 1) The composite of death, non-fatal MI, non-fatal stroke, or urgent TVR (co-primary efficacy endpoint);
- 2) The composite of BARC type 3 or 5 bleeding (co-primary safety endpoint).

Secondary endpoints will include:

- Each component of the co-primary composite endpoints;
- Definite, probable or possible stent thrombosis according to ARC classification;
- Bleeding events according to BARC, TIMI and GUSTO classifications;
- Type of death (cardiovascular vs. non-cardiovascular and subtypes).

## Clinical Event Committee Procedures

According to best adjudication practice,<sup>8</sup> GLASSY is being conducted according to the following features:

**1. Prospective approach to adjudication.** The CEC dataset will be locked before the termination of the parent study. Suspected events (triggers) will be assessed during the conduct of the study rather than adjudicating all cases after the study is completed and the primary results are available (i.e. retrospective adjudication). In case of updated entry of

1  
2  
3 suspected events or updated source documentation by the site after request by the CEC  
4 team of source documentation, events will be re-evaluated for adjudication.  
5  
6  
7

8 **2. Blinding of randomized treatment allocation.** According to the PROBE  
9 methodology,<sup>9,10</sup> the CEC will be blinded to randomized treatment allocation.  
10 Several steps will be undertaken to ensure that the CEC personnel and physicians remain  
11 blinded.  
12  
13  
14

15 *First*, any reference to treatment assignment contained in the eCRF or source  
16 documents that could lead to un-blinding of treatment assignment will be obliterated by  
17 using a black marker by the site prior to submission to the CEC physician members.  
18  
19

20 *Second*, the CEC coordinator and operation personnel will obliterate any  
21 reference to study drug assignment prior to distribution to the physicians if information is  
22 noted during the preparation of the event packet.  
23  
24

25 *Third*, if a reviewer notes the treatment assignment during the review of a  
26 particular event, the CEC coordinator is notified, and the event is sent for review by the  
27 third expert reviewer.  
28  
29  
30  
31

32 **3. Triggering and adjudication of investigator- as well as non-investigator reported**  
33 **events.**  
34  
35

36 All IR-events (death, MI, stroke, bleeding, coronary revascularization, and stent  
37 thrombosis) will be adjudicated by the CEC through dedicated CRFs (online Appendix).  
38 We will also use comprehensive search strategies for potential cardiovascular events that  
39 are not reported by the investigator via eCRF dedicated queries. Indeed, it may happen  
40 that patients without IR-events or triggers may have experienced an event qualifying for  
41 the endpoints of the GLASSY study.<sup>10</sup>  
42  
43  
44  
45

46 It is possible that the request of source documentation may trigger endpoint  
47 reporting (and bias the study toward the null hypothesis). To quantify this, IR endpoints  
48 entered after CEC requested source documentation will be monitored and reported.  
49  
50  
51  
52

53 **4. Independent voting processes** by CEC members with at least 3 CEC members (see  
54 Appendix A) with knowledge of the geographic variations of care represented in the trial.  
55  
56  
57  
58  
59  
60

1  
2  
3 Each event will be reviewed independently by at least two CEC physicians. In case of  
4 disagreement, the event will be reviewed by a Committee of at least 3 reviewers with  
5 independent vote.  
6  
7  
8  
9

##### 10 **5. Independence from parent study.**

11 To maximize the scientific integrity of GLASSY, CEC personnel will operate  
12 independently from the data management group of the parent study, including no cross  
13 talk on trigger logic specifications, query processes for source documentation, and most  
14 importantly event reporting and adjudication results.  
15  
16  
17  
18  
19

##### 20 **6. Quantification of sufficient evidence for adjudication of non-fatal triggers (NO** 21 **versus UNKNOWN events).**

22 Finally, we will quantify the minimum amount of evidence required for the  
23 assessment of non-fatal endpoints. In a randomized trial, a pre-requisite to assess whether  
24 a suspected non-fatal endpoint has occurred or not is the availability of sufficient  
25 evidence for such an assessment, including relevant source documents, tests, and/or  
26 laboratory exams. While this is commonly performed for fatal events (death is  
27 adjudicated as “unknown” in case of no or insufficient description of death  
28 circumstances), it is not generally mandatory for non-fatal events.  
29  
30  
31  
32  
33  
34  
35

36 In GLASSY, for each non-fatal trigger examined an assessment will be performed  
37 as to whether enough information is available for formal adjudication. This will allow  
38 distinguishing triggers that did not meet the endpoint definition (i.e. no event with  
39 sufficient documentation present) from triggers for which this is unknown due to  
40 insufficient documentation. For each type of non-fatal endpoint, the proportion of events  
41 with insufficient evidence will indirectly estimate a) the feasibility of GLASSY b) the  
42 quality of endpoint reported by sites and c) the uncertainty of the evidence related to the  
43 studied outcome.  
44  
45  
46  
47  
48  
49

50 Sufficient evidence for CEC adjudication includes at a minimum a narrative  
51 description with at least one pertinent medical documentation, including ECG/biomarkers  
52 for MI; angiographic report for stent thrombosis and urgent revascularization; brain  
53 imaging for stroke; and labs and other appropriate testing for bleeding. In case of CRF-  
54  
55  
56  
57  
58  
59  
60

1  
2  
3 only narrative, the evidence will be considered insufficient and the case will not undergo  
4 CEC adjudication.  
5  
6  
7

## 8 **7. Quality control of the adjudication process**

9

10 To ensure the highest reproducibility, a random sample of  $\approx 5\%$  of adjudicated  
11 events will be re-reviewed by the complete CEC committee (ie 3 member) who are  
12 blinded to the initial results.  
13  
14

15 A major disagreement will be considered if there was a disagreement on whether  
16 an event had occurred or not while a minor disagreement is any discordance on the  
17 remaining adjudicated fields. Major disagreement will be reported as part of the final  
18 study report and will be used to identify the presence of systematic problems in the  
19 adjudication process.  
20  
21  
22  
23  
24  
25

## 26 **CEC Operations**

27

28 Within the selected study patients, all IR-events as well as additional potential  
29 events (triggers) identified through a systematic analysis of the eCRF form will be  
30 considered for CEC adjudication. Non-IR triggers will be assessed after all the relevant  
31 source documentation has been requested to and provided by the participating sites and  
32 will be identified using a comprehensive search strategy that consider key words logically  
33 related to the event. In general, key words with a clear relationship to the endpoint of  
34 interest (e.g. for MI: unstable angina or ischemic heart disease) will trigger a formal CEC  
35 review, whereas keywords with a potential relationship (e.g. for MI: asystole, cardiac  
36 tamponade, hypertensive crisis) will trigger a review by a physician (independent from  
37 the CEC members) (**Appendix**). In the latter case, the event will undergo formal CEC  
38 review only if the reviewing physician will suspect an event. To limit possible reporting  
39 bias toward the null hypothesis (i.e. querying for source documentation may stimulate a  
40 site to report previously unreported endpoints), only patients who have successfully  
41 completed the follow-up, data entry, and all query processes for the parent study will be  
42 deemed eligible for the GLASSY study. For sites whose first language is not English, a  
43 mother tongue MD will be involved for source documentation translation.  
44  
45  
46  
47  
48  
49  
50  
51  
52  
53  
54  
55  
56  
57  
58  
59  
60

1  
2  
3 The first approval for GLASSY occurred on April 18 2017 and the first  
4 adjudication has been performed on September,6, 2017..  
5  
6  
7

### 8 **Statistical analyses and sample size considerations**

9  
10 The co-primary efficacy endpoint will be firstly tested as non-inferiority followed by a  
11 superiority testing only if non-inferiority criteria will be met. The co-primary safety  
12 endpoint will be tested with a superiority hypothesis only. Alpha error will be evenly split  
13 (2.5% each) between the two co-primary endpoints. Based on best available data at the  
14 time of study design, the expected rate of the co-primary efficacy composite endpoint of  
15 death, non-fatal MI, non-fatal stroke, or urgent TVR is 11% at 24 months in the control  
16 group. The expected rate of co-primary safety endpoint of type 3 or 5 BARC bleeding is  
17 5% at 24 months in the control group. For the co-primary efficacy endpoint non-  
18 inferiority will be declared if the upper limit of the 95% confidence interval for the  
19 experimental (i.e. ticagrelor monotherapy) versus conventional arm at 24 months is less  
20 than 1.22 on a risk ratio scale, corresponding to 2.2% absolute risk difference. A total of  
21 3,340 patients per group (6,680 patients) will yield 85% power to detect non-inferiority  
22 with a one-sided type I error (alpha) of 2.5%. The risk ratio will be calculated using the  
23 Mantel-Cox log-rank method.  
24  
25

26  
27 If non-inferiority will be met, 3,593 patients per group (7,186 patients) will provide 80%  
28 power to assess the superiority for the co-primary efficacy endpoint at 24 months,  
29 assuming 20% relative risk reduction in the experimental arm and a two-sided alpha of  
30 2.5%. A total of 7,186 patients will provide more than 80% power to detect a relative risk  
31 reduction of 33% in the experimental arm at 2 years with respect to co-primary safety  
32 endpoint of BARC 3 or 5 bleeding, setting the two-sided alpha error at 2.5%. For each  
33 trigger, the CEC-adjudicated events will be used if the evidence is sufficient and the IR  
34 endpoint if the evidence is not sufficient (ie “best available” data).  
35  
36  
37  
38  
39  
40  
41  
42  
43  
44  
45  
46  
47  
48  
49

### 50 **Representativeness of the selected study cohort**

51  
52 There is no a priori attempt to select a patient population in GLASSY that could  
53 be entirely representative of the whole population included in the parent study. This  
54 would require random selection of the sample at the patient level or at least at the site  
55  
56  
57  
58  
59  
60

1  
2  
3 level which, although ideally desirable, would be financially unsustainable for an  
4 investigator-initiated study.

5  
6 Importantly, in GLOBAL LEADERS the randomization was stratified by site.  
7  
8 This means that GLASSY is a randomized substudy of the parent study and therefore the  
9 estimation of treatment effects are expected to be valid.

10  
11 Baseline characteristics, quality indicators and risk profile of GLOBAL  
12 LEADERS patients according to GLASSY inclusion are presented in Table 1 and 2, with  
13 no significant interactions on any of the variables considered.

14  
15 The estimated minimum sample size was 7,186. Therefore, to minimize the  
16 number of participating sites, only those with the highest recruitment rate based on the  
17 final number of included subjects were included. Accordingly, the top 19 recruiting sites  
18 would have provided an overall of 7,365 patients. These 19 top ranking recruitment sites  
19 were invited in Q1 2017 and all agreed to participate.

20  
21 Local and, where deemed necessary, central institutional review approval was  
22 sought for all 19 participating sites in the form of either a protocol addendum or site-  
23 specific amendment. In Q1 2018, due to delays in getting study approved for the  
24 Bulgarian site ranked at 19<sup>th</sup> position, the invitation to participate was extended to an  
25 additional site that was ranked at 20<sup>th</sup> position. This would allow reaching a final  
26 population of 7,601 patients.

### 27 28 29 30 31 32 33 34 35 36 37 **Evaluation of the concordance between IR- and CEC-adjudicated** 38 **endpoints**

39  
40 Concordance between IR- and CEC-adjudicated endpoints will be assessed in  
41 events with sufficient evidence only. We will use the Cohen's kappa with exact binomial  
42 95 percent confidence intervals as a measurement of the extent of agreement beyond  
43 chance alone. Cohen originally suggested the Kappa result be interpreted as follows:  
44 values  $\leq 0$  as indicating no agreement and 0.01–0.20 as none to slight, 0.21–0.40 as fair,  
45 0.41– 0.60 as moderate, 0.61–0.80 as substantial, and 0.81–1.00 as almost perfect  
46 agreement. However, Cohen's suggested interpretation was critiqued as too lenient for  
47 health-related studies because it implies that a score as low as 0.41 might be acceptable.  
48 Therefore, we will interpret concordance between IR- and CEC-endpoints as follows:<sup>11</sup>  
49  
50  
51  
52  
53  
54  
55 0–0.20            None  
56  
57  
58  
59  
60



|            |                |
|------------|----------------|
| 0.21–0.39  | Minimal        |
| 0.40–0.59  | Weak           |
| 0.60–0.79  | Moderate       |
| 0.80–0.90  | Strong         |
| Above 0.90 | Almost Perfect |

## Patient and Public Involvement

In GLASSY, the research question was developed to compliment the investigator-assessment. While no specific patient reported outcome has been considered, the extensive characterization of several non-fatal endpoints is expected to provide a thorough assessment of intervention on patient experience. GLASSY results will be disseminated to patients mainly via the local investigators. We especially take here the opportunity to thank all patients and families who volunteered to help others.

## Study organization

The European Cardiovascular Research Institute (ECRI-Trials B.V., PO Box 2125, 3000 CC Rotterdam, The Netherlands) will act as Sponsor of this substudy. The leadership of the GLASSY is composed of the chair (Prof. Stephan Windecker) and principal investigator (Prof. Marco Valgimigli), in conjunction with the CEC members. Along with the executive committee of the parent study and one representative for each included GLASSY site they will form the publication committee.

## Discussion

CECs are intended to enhance the scientific validity of a clinical trial through systematic, independent, and standardized identification, processing, and adjudication of suspected events. There are multiple lines of evidence indicating that central and independent adjudication of events may affect the results of a randomized trial by identifying clinically relevant unreported events,<sup>12-14</sup> by minimizing variability and heterogeneity inherently present when several different clinicians and data managers apply definitions of endpoints which are complex and sometimes not well known,<sup>15</sup> with implications on the interpretation of the effect of a randomized intervention.<sup>16</sup> Finally,



1  
2  
3 there has been an increasing regulatory emphasis on the requirement of an independent  
4 CEC.<sup>17,18,19</sup>  
5

6  
7 An analysis of the randomized PURSUIT trial documented that site investigator  
8 and CEC assessments of whether a MI had occurred disagreed in 983 (20%) of the 5,005  
9 patients with suspected MI, mostly reflecting site misclassification of post-enrolment MIs  
10 (as enrolment MIs) or underreported periprocedural MIs with a higher mortality  
11 associated with CEC-identified MIs as compared with patients with no MI.<sup>12</sup> Similarly in  
12 *post-hoc* analysis of two large randomized studies testing antithrombotic therapies in  
13 patients with coronary artery disease, CEC procedures identified more events (both  
14 ischemia and bleeding) as compared to site investigators.<sup>13,14</sup> Moreover, independent  
15 adjudication of ischemic and bleeding endpoints may provide important mechanistic  
16 information that may deepen understanding of the primary endpoint result of the study by  
17 better characterizing components of such endpoints including, but not limited to cause of  
18 death, sub-type of MI according to standardized definitions,<sup>20</sup> and bleeding location.  
19  
20  
21  
22  
23  
24  
25  
26

27 Also standardized adjudication processes provide the basis for consistency and  
28 reproducibility. In large validation effort of all-comer stent trials, a harmonization  
29 process provided a high level of concordance for event adjudication and improved  
30 accuracy for final event reporting.<sup>15</sup>  
31  
32  
33

34 Finally, the presence of a CEC has been not only strongly advocated by regulatory  
35 authorities,<sup>17</sup> but also requested in some instances for concern of bias in open label  
36 studies.<sup>18</sup> Notably, regulatory authorities have been recently involved directly in  
37 endpoint definition along with investigators, pharmaceutical and CV device  
38 manufacturers, and other stakeholders.<sup>19</sup>  
39  
40  
41  
42

43 GLASSY is a first of its kind scientific study designed to implement CEC  
44 processes in the context of a large phase III pragmatic trial intended to collect only  
45 investigator-reported endpoints. As such, it may provide unique information on how the  
46 adoption of CEC processes may affect study results. Some design features of a RCT,  
47 including blinding of randomized treatment and independent endpoint adjudication, may  
48 be complex, costly, and challenging to implement in a pragmatic trial thus limiting study  
49 feasibility. On the other hand, these characteristics are important to enhance the scientific  
50 validity and quality of the evidence generated by minimizing detection and/or reporting  
51  
52  
53  
54  
55  
56  
57  
58  
59  
60

1  
2  
3 bias. GLASSY may indirectly allow to assess whether such bias(es) are present in  
4 GLOBAL LEADERS by quantifying the concordance (or lack thereof) between IR- and  
5 CEC-adjudicated endpoints. In other words, to test the value of CECs. This could have  
6 relevant implications not only for the interpretation of the GLOBAL LEADERS results  
7 but also to inform the design of similar studies in the future.  
8  
9

10  
11 Pragmatic clinical trials are fundamental to complement earlier phase studies  
12 designed to explore the efficacy of a given intervention. In addition, recent registry based  
13 randomized trials have been appraised owing to their ability to address clinically relevant  
14 questions, in large representative patient populations at limited cost. Pragmatism, an  
15 established concept in clinical research, aims at enhancing generalizability rather than  
16 internal validity of a study result and promote clinical or policy decision-making by  
17 providing evidence for the adoption of a given intervention into real-world clinical  
18 practice.<sup>21-23</sup> To quantify the pragmatism of a clinical trial, tools have been proposed to  
19 examine whether key dimensions of a study – such as eligibility, recruitment, and  
20 primary outcome – are directly related and relevant to usual care.<sup>24</sup> Importantly, the role  
21 of independent endpoint adjudication in this context is a quality rather than a pragmatic  
22 issue. If the quality and consistency of endpoint ascertainment can be improved by  
23 adjudication without affecting routine patient care, CECs are highly desirable.<sup>25</sup>  
24  
25  
26  
27  
28  
29  
30  
31  
32  
33

34 A typical strength of CEC processes is to provide standardization around  
35 secondary outcomes or subtype of events, such as characterization of the modality of  
36 death, the location of a bleeding or the type of MI according to the Universal  
37 Classification, that may be not reliably collected in the absence of standardized  
38 definitions and conventions. These data however, are important to fully characterize the  
39 efficacy and safety of a antithrombotic treatment intervention, such as that studied in the  
40 GLOBAL LEDERS study. According to best adjudication practice, GLASSY will collect  
41 and analyze extensive outcome data, beyond the occurrence of the event itself, that were  
42 not considered in GLOBAL LEADERS CRF. Additionally, for each non-fatal suspected  
43 endpoint we will assess if the documentation provided by the site was sufficient to  
44 understand whether the endpoint has occurred or not that may allow indirectly estimating  
45 the quality of endpoint reporting by the site.  
46  
47  
48  
49  
50  
51  
52  
53  
54  
55  
56  
57  
58  
59  
60

## Limitations

An intrinsic limitation of GLASSY is that GLOBAL LEADERS has been designed as an IR-only study. Therefore, systematic identification of study endpoints is limited by the eCRF and relies on source documentation provided by the site, which reduces the ability to identify all possible potential endpoints.

In addition, GLASSY, for logistical reasons, will be conducted in a representative sample rather than the entire parent study. Although a random sample would have been ideal in this setting, this was neither feasible or financially sustainable. The practical reason to focus enrollment for GLASSY to top enrolling center may bias the study toward the null hypothesis of no difference between IR- and CEC-adjudicated endpoint by selecting best enrolling sites. While this bias is possible, the relatively large study sample ( $\approx 50\%$  of the parent study) makes this possibility unlikely.

## Conclusions

GLASSY will assess the scientific implications of CEC adjudication processes within a large RCT designed to collect only IR-reported events, to extend the assessment of the effectiveness and safety of the randomized intervention tested in GLOBAL LEADERS to a broad range of non-fatal ischemic and bleeding endpoints, and ultimately test the value of standardized CEC processes within a pragmatic study design.

## Contributor ship, Competing Interest and Funding

MV, SW, SL, AF, EMcF designed the study. MV, SL, AF, RP, EMcF drafted the manuscripts. All other authors contributed to data management and provided substantial critical revision.

SL reports personal fees for advisory board participation from AstraZeneca, Chiesi, The Medicine Company. Dr Valgimigli reports grants from The Medicines Company, grants from Terumo, during the study; grants from AstraZeneca, and personal fees from Terumo, St Jude Vascular, and Abbott Vascular, outside the submitted work.

The study is independently financed by resources of a professorship grant at the University of Bern, Switzerland. No extramural funding was used to support this

manuscript. The authors are solely responsible for the drafting and editing of the paper and its final contents.

## References

1. Valgimigli M, Bueno H, Byrne RA, et al. 2017 ESC focused update on dual antiplatelet therapy in coronary artery disease developed in collaboration with EACTS: The Task Force for dual antiplatelet therapy in coronary artery disease of the European Society of Cardiology (ESC) and of the European Association for Cardio-Thoracic Surgery (EACTS). *Eur Heart J* 2017. [Epub ahead of print]
2. J.A. Jakubowski, N. Matsushima, F. Asai, et al. A multiple dose study of prasugrel (CS-747), a novel thienopyridine P2Y<sub>12</sub> inhibitor, compared with clopidogrel in healthy humans. *Br J Clin Pharmacol*, 63 (2007), pp. 421-430
3. Siller-Matula JM, Trenk D, Schrör K, Gawaz M, Kristensen SD, Storey RF, Huber K; EPA (European Platelet Academy). Response variability to P2Y<sub>12</sub> receptor inhibitors: expectations and reality. *JACC Cardiovasc Interv*. 2013 Nov;6(11):1111-28.
4. Wallentin L, Becker RC, Budaj A, Cannon CP, Emanuelsson H, Held C, Horrow J, Husted S, James S, Katus H, Mahaffey KW, Scirica BM, Skene A, Steg PG, Storey RF, Harrington RA; PLATO Investigators, Freij A, Thorsén M. Ticagrelor versus clopidogrel in patients with acute coronary syndromes. *N Engl J Med* 2009;361(11):1045-57.
5. Armstrong PC, Leadbeater PD, Chan MV, Kirkby NS, Jakubowski JA, Mitchell JA, Warner TD. In the presence of strong P2Y<sub>12</sub> receptor blockade, aspirin provides little additional inhibition of platelet aggregation. *J Thromb Haemost*. 2011;9:552-61.
6. Gargiulo G, Windecker S, Vranckx P, Gibson CM, Mehran R, Valgimigli M. A Critical Appraisal of Aspirin in Secondary Prevention: Is Less More? *Circulation*. 2016 Dec 6;134(23):1881-1906.
7. Vranckx P, Valgimigli M, Windecker S, Steg PG, Hamm C, Jüni P, Garcia-Garcia HM, van Es GA, Serruys PW. Long-term ticagrelor monotherapy versus standard dual antiplatelet therapy followed by aspirin monotherapy in patients undergoing biolimus-eluting stent implantation: rationale and design of the GLOBAL LEADERS trial. *EuroIntervention* 2016 Nov 20;12(10):1239-1245.
8. Seltzer JH, Turner JR, Geiger MJ, et al. Centralized adjudication of cardiovascular end points in cardiovascular and noncardiovascular pharmacologic trials: a report from the Cardiac Safety Research Consortium. *Am Heart J*. 2015;169(2):197-204.

- 1  
2  
3  
4 9. Hansson L, Hedner T, Dahlöf B. Prospective randomized open blinded end-point (PROBE) study. A novel design for intervention trials. *Prospective Randomized Open Blinded End-Point*. *Blood Press* 1992;1:113–9.
- 8  
9 10. Kahan BC, Cro S, Dore CJ, et al. Reducing bias in open-label trials where blinded outcome assessment is not feasible: strategies from two randomised trials. *Trials*. 2014;15:456.
- 12  
13 11. McHugh ML. Interrater reliability: the kappa statistic. *Biochem Med (Zagreb)*. 2012;22(3):276-282.
- 16  
17 12. Mahaffey KW, Harrington RA, Akkerhuis M, et al. Disagreements between central clinical events committee and site investigator assessments of myocardial infarction endpoints in an international clinical trial: review of the PURSUIT study. *Current Controlled Trials in Cardiovascular Medicine*. 2001;2(4):187-194. doi:10.1186/cvm-2-4-187.
- 20  
21 13. Jatene T, Harrington RA, Stone GW, Steg PG, Gibson CM, Hamm CW, Price MJ, Prats J, Deliargyris EN, Mahaffey KW, White HD, Bhatt DL; CHAMPION PHOENIX Investigators. Investigator-Reported Bleeding Versus Post Hoc Adjudication of Bleeding: Lessons From the CHAMPION PHOENIX Trial. *J Am Coll Cardiol*. 2016 Feb 9;67(5):596-8.
- 24  
25 14. Mahaffey KW, Held C, Wojdyla DM, James SK, Katus HA, Husted S, Steg PG, Cannon CP, Becker RC, Storey RF, Khurmi NS, Nicolau JC, Yu CM, Ardissino D, Budaj A, Morais J, Montgomery D, Himmelmann A, Harrington RA, Wallentin L; PLATO Investigators. Ticagrelor effects on myocardial infarction and the impact of event adjudication in the PLATO (Platelet Inhibition and Patient Outcomes) trial. *J Am Coll Cardiol*. 2014 Apr 22;63(15):1493-9.
- 28  
29 15. Vranckx P, McFadden E, Cutlip DE, Mehran R, Swart M, Kint PP, Zijlstra F, Silber S, Windecker S, Serruys PW. Clinical endpoint adjudication in a contemporary all-comers coronary stent investigation: methodology and external validation. *Contemp Clin Trials* 2013 Jan;34(1):53-9.
- 32  
33 16. Leonardi S, Lopes RD, Steg PG, Abnoui F, Menozzi A, Prats J, Mangum S, Wilson M, Todd M, Stone GW, Gibson CM, Hamm CW, Price MJ, White HD, Harrington RA, Bhatt DL, Mahaffey KW. Implications of different criteria for percutaneous coronary intervention-related myocardial infarction on study results of three large phase III clinical trials: The CHAMPION experience. *Eur Heart J Acute Cardiovasc Care* 2016. pii: 2048872616661692.
- 36  
37 17. Farb A, Zuckerman BD. Clinical event adjudication in cardiovascular device trials: An Food and Drug Administration perspective. *Am Heart J* 2017 Sep;191:62-64.

18. Lopes RD, Dickerson S, Hafley G, Burns S, Tourt-Uhlig S, White J, Newby LK, Komajda M, McMurray J, Bigelow R, Home PD, Mahaffey KW. Methodology of a reevaluation of cardiovascular outcomes in the RECORD trial: study design and conduct. *Am Heart J*. 2013 Aug;166(2):208-216.e28.
19. Hicks KA, Mahaffey KW, Mehran R, Nissen SE, Wiviott SD, Dunn B, Solomon SD, Marler JR, Teerlink JR, Farb A, Morrow DA, Targum SL, Sila CA, Thanh Hai MT, Jaff MR, Joffe HV, Cutlip DE, Desai AS, Lewis EF, Gibson CM, Landray MJ, Lincoff AM, White CJ, Brooks SS, Rosenfield K, Domanski MJ, Lansky AJ, McMurray JJV, Tcheng JE, Steinhubl SR, Burton P, Mauri L, O'Connor CM, Pfeffer MA, Hung HMJ, Stockbridge NL, Chaitman BR, Temple RJ; Standardized Data Collection for Cardiovascular Trials Initiative (SCTI). 2017 Cardiovascular and Stroke Endpoint Definitions for Clinical Trials. *J Am Coll Cardiol*. 2018 Mar 6;71(9):1021-1034.
20. Leonardi S, Truffa AA, Neely ML, Tricoci P, White HD, Gibson CM, Wilson M, Stone GW, Harrington RA, Bhatt DL, Mahaffey KW. A novel approach to systematically implement the universal definition of myocardial infarction: insights from the CHAMPION PLATFORM trial. *Heart* 2013 Sep;99(17):1282-7.
21. Sacristán JA, Dilla T. Generalizability in Pragmatic Trials. *JAMA* 2017; 317(1):87-88.
22. Fröbert O, Lagerqvist B, Olivecrona GK, Omerovic E, Gudnason T, Maeng M, Aasa M, Angerås O, Calais F, Danielewicz M, Erlinge D, Hellsten L, Jensen U, Johansson AC, Kåregren A, Nilsson J, Robertson L, Sandhall L, Sjögren I, Ostlund O, Harnek J, James SK; TASTE Trial. Thrombus aspiration during ST-segment elevation myocardial infarction. *N Engl J Med* 2013;369(17):1587-97.
23. Lauer MS, D'Agostino RB Sr. The randomized registry trial--the next disruptive technology in clinical research? *N Engl J Med*. 2013 Oct 24;369(17):1579-81.
24. Loudon K, Treweek S, Sullivan F, Donnan P, Thorpe KE, Zwarenstein M. The PRECIS-2 tool: designing trials that are fit for purpose. *BMJ* 2015;350:h2147
25. Ford I, Norrie J. Pragmatic Trials. *N Engl J Med*. 2016 Aug 4;375(5):454-63.

## Tables

**Table 1. Baseline characteristics of GLOBAL LEADERS patients according to GLASSY inclusion**

|                                             | GLASSY<br>(20 sites)<br>N = 7585 | NO GLASSY<br>(110 sites)<br>N = 8383 | p<br>Value |
|---------------------------------------------|----------------------------------|--------------------------------------|------------|
| Age (years)                                 | n = 7585, 64.9 ±<br>10.3         | n = 8383, 64.2 ±<br>10.3             | 0,41       |
| Female                                      | n = 7585, 1799<br>(23.7%)        | n = 8383, 1915<br>(22.8%)            | 0,33       |
| Hypertension                                | n = 7565, 5492<br>(72.6%)        | n = 8349, 6223<br>(74.5%)            | 0,70       |
| Diabetes mellitus                           | n = 7584, 1822<br>(24.0%)        | n = 8373, 2216<br>(26.5%)            | 0,47       |
| Renal failure (<60 eGFR)                    | n = 7567, 1005<br>(13.3%)        | n = 8316, 1166<br>(14.0%)            | 0,83       |
| Peripheral vascular disease                 | n = 7550, 553<br>(7.3%)          | n = 8272, 452<br>(5.5%)              | 0,030      |
| Current smoker                              | n = 7585, 2186<br>(28.8%)        | n = 8383, 1983<br>(23.7%)            | 0,007      |
| Previous myocardial infarction              | n = 7575, 1762<br>(23.3%)        | n = 8347, 1948<br>(23.3%)            | 0,91       |
| Previous percutaneous coronary intervention | n = 7581, 2522<br>(33.3%)        | n = 8373, 2699<br>(32.2%)            | 0,53       |
| Previous coronary artery bypass grafting    | n = 7581, 443<br>(5.8%)          | n = 8374, 500<br>(6.0%)              | 0,62       |
| Stable CAD                                  | n = 7585, 3745<br>(49.4%)        | n = 8383, 4736<br>(56.5%)            | 0,048      |
| Multivessel treatment                       | n = 7585, 1098                   | n = 8383, 1248                       | 0,65       |



|                                                       |                     |                     |      |
|-------------------------------------------------------|---------------------|---------------------|------|
|                                                       | (14.5%)             | (14.9%)             |      |
| Previous major bleeding or predisposition to bleeding | n = 7572, 48 (0.6%) | n = 8375, 50 (0.6%) | 0,78 |

Mixed-models p-values, accounting for a random effect of hospital identifier.

**Table 2. Quality indicators and risk profile of GLOBAL LEADERS patients according to GLASSY inclusion**

|                                                                    | GLASSY               | NO GLASSY            | p-value | interaction p-value |
|--------------------------------------------------------------------|----------------------|----------------------|---------|---------------------|
| Nr of patients                                                     | N = 7585             | N = 8383             |         |                     |
| All-cause mortality or New Q-wave MI or equivalent LBBB at 2 years | n = 7585, 328 (4.3%) | n = 8383, 325 (3.9%) | 0,16    | 0,77                |
| All-cause mortality at 2 years                                     | n = 7585, 247 (3.3%) | n = 8383, 230 (2.7%) | 0,06    | 0,34                |
| New Q-wave MI or equivalent LBBB at 2 years                        | n = 7585, 89 (1.2%)  | n = 8383, 97 (1.2%)  | 0,93    | 0,34                |
| BARC 3 or 5 Bleeding at 2 years                                    | n = 7585, 168 (2.2%) | n = 8383, 164 (2.0%) | 0,26    | 0,90                |



|    |                                                                                                         |                             |                              |        |      |
|----|---------------------------------------------------------------------------------------------------------|-----------------------------|------------------------------|--------|------|
| 1  |                                                                                                         |                             |                              |        |      |
| 2  |                                                                                                         |                             |                              |        |      |
| 3  |                                                                                                         |                             |                              |        |      |
| 4  |                                                                                                         |                             |                              |        |      |
| 5  | BARC 1 Bleeding at 2 years                                                                              | n = 7585,<br>657 (8.7%)     | n = 8383,<br>662 (7.9%)      | 0,08   | 0,59 |
| 6  |                                                                                                         |                             |                              |        |      |
| 7  |                                                                                                         |                             |                              |        |      |
| 8  |                                                                                                         |                             |                              |        |      |
| 9  | Primary endpoint complete?                                                                              | n = 7585,                   | n = 8383,                    | <0.001 | 0,75 |
| 10 |                                                                                                         |                             |                              |        |      |
| 11 |                                                                                                         |                             |                              |        |      |
| 12 | complete                                                                                                | 7152 (94.3%)                | 7683 (91.6%)                 |        |      |
| 13 |                                                                                                         |                             |                              |        |      |
| 14 |                                                                                                         |                             |                              |        |      |
| 15 |                                                                                                         |                             |                              |        |      |
| 16 | vital status unknown                                                                                    | 0 (0.0%)                    | 8 (0.1%)                     |        |      |
| 17 |                                                                                                         |                             |                              |        |      |
| 18 |                                                                                                         |                             |                              |        |      |
| 19 | patient died post-2yrs & ECG information<br>unavailable                                                 | 11 (0.1%)                   | 16 (0.2%)                    |        |      |
| 20 |                                                                                                         |                             |                              |        |      |
| 21 |                                                                                                         |                             |                              |        |      |
| 22 |                                                                                                         |                             |                              |        |      |
| 23 |                                                                                                         |                             |                              |        |      |
| 24 | patient alive & ECG information unavailable                                                             | 422 (5.6%)                  | 676 (8.1%)                   |        |      |
| 25 |                                                                                                         |                             |                              |        |      |
| 26 |                                                                                                         |                             |                              |        |      |
| 27 |                                                                                                         |                             |                              |        |      |
| 28 |                                                                                                         |                             |                              |        |      |
| 29 |                                                                                                         |                             |                              |        |      |
| 30 | Nr of sites                                                                                             | N = 20 sites                | N = 110 sites                |        |      |
| 31 |                                                                                                         |                             |                              |        |      |
| 32 |                                                                                                         |                             |                              |        |      |
| 33 |                                                                                                         |                             |                              |        |      |
| 34 |                                                                                                         |                             |                              |        |      |
| 35 |                                                                                                         |                             |                              |        |      |
| 36 |                                                                                                         |                             |                              |        |      |
| 37 |                                                                                                         |                             |                              |        |      |
| 38 | Nr of protocol deviations/10 patients                                                                   | n = 20, 0.4<br>(0.1 to 0.8) | n = 110,<br>0.6 (0.2 to 1.3) | 0,14   |      |
| 39 |                                                                                                         |                             |                              |        |      |
| 40 |                                                                                                         |                             |                              |        |      |
| 41 |                                                                                                         |                             |                              |        |      |
| 42 |                                                                                                         |                             |                              |        |      |
| 43 | Statin at discharge                                                                                     | n = 7547,<br>6954 (92.1%)   | n = 8324,<br>7747 (93.1%)    | 0,78   |      |
| 44 |                                                                                                         |                             |                              |        |      |
| 45 |                                                                                                         |                             |                              |        |      |
| 46 |                                                                                                         |                             |                              |        |      |
| 47 |                                                                                                         |                             |                              |        |      |
| 48 | Heart failure or left ventricular ejection fraction $\leq$<br>40% treated and ACE or ARB at discharge   | n = 251,<br>207 (82.5%)     | n = 284,<br>232 (81.7%)      | 0,51   |      |
| 49 |                                                                                                         |                             |                              |        |      |
| 50 |                                                                                                         |                             |                              |        |      |
| 51 |                                                                                                         |                             |                              |        |      |
| 52 | Heart failure or left ventricular ejection fraction $\leq$<br>40% treated and betablockers at discharge | n = 157,<br>130 (82.8%)     | n = 221,<br>181 (81.9%)      | 0,88   |      |
| 53 |                                                                                                         |                             |                              |        |      |
| 54 |                                                                                                         |                             |                              |        |      |
| 55 |                                                                                                         |                             |                              |        |      |
| 56 |                                                                                                         |                             |                              |        |      |
| 57 |                                                                                                         |                             |                              |        |      |
| 58 |                                                                                                         |                             |                              |        |      |
| 59 |                                                                                                         |                             |                              |        |      |
| 60 |                                                                                                         |                             |                              |        |      |

1  
2  
3 GLASSY includes 20 sites, NO GLASSY includes 110 sites, total  
4 nr of sites was 130.  
5

6 p-values from Mantel-Cox logrank test, interaction p-value testing whether the GLASSY vs non-GLASSY sites modify  
7 the comparison Experimental treatment strategy vs Reference treatment strategy for the clinical outcomes. Protocol  
8 deviations compared with Mann-Whitney U-test.  
9

10 Protocol deviations included: inclusion/exclusion criteria, informed consent procedure,  
11 randomization procedure, study procedures, safety reporting.  
12  
13  
14  
15  
16  
17  
18  
19  
20  
21  
22  
23

## 24 **Figures**

25  
26  
27 **Figure 1. GLOBAL LEADERS Design.**  
28  
29

30 **Figure 2. GLASSY Design**  
31  
32  
33  
34  
35  
36  
37

## 38 **APPENDIX**

### 39 40 41 **Clinical Events Committee**

42 CEC project leader: Anna Franzone.  
43  
44

45 *Clinical Events Committee Composition*  
46  
47

48 Chair: Eugene Mc Fadden, Co-chair: Sergio Leonardi, Member: Raffaele Piccolo.  
49  
50  
51  
52

### 53 **Endpoints Definitions**

#### 54 55 **BLEEDING** 56 57 58 59 60

All potential bleeding events will be primarily adjudicated according to Bleeding Academic Research Consortium (BARC) classification as well as according to the TIMI and the GUSTO classification as follows:

Type 0: No bleeding

Type 1: Bleeding that is not actionable and does not cause the patient to seek unscheduled performance of studies, hospitalization, or treatment by a health care professional. May include episodes leading to self-discontinuation of medical therapy by the patient, without consulting a health care professional.

Type 2: Any overt, actionable sign of haemorrhage (e.g. more bleeding than would be expected for a clinical circumstance; including bleeding found by imaging alone) that does not fit the criteria for Types 3, 4, or 5 but does meet at least one of the following criteria:

Requiring non-surgical, medical intervention by a health care professional

Leading to hospitalization of increased level of care

Prompting evaluation

Type 3a:

- Overt bleeding plus haemoglobin drop of 3 to  $<5^{**}$  g/dL (provided haemoglobin drop is related to bleed)

- Any transfusion with overt bleeding

Type 3b:

- Overt bleeding plus haemoglobin drop  $\geq 5^{**}$  g/dL (provided haemoglobin drop is related to bleed)

- Cardiac tamponade

- Bleeding requiring surgical intervention for control (excluding dental / nasal / skin / haemorrhoid)

- Bleeding requiring intravenous vasoactive agents

Type 3c:

- Intracranial haemorrhage (does not include microbleeds or haemorrhagic transformation; does include intraspinal)

Subcategories: confirmed by autopsy or imaging or LP

Intra-ocular bleed compromising vision

Type 4: CABG-related bleeding

- Perioperative intracranial bleeding within 48 hours
- Reoperation following closure of sternotomy for the purpose of controlling bleeding
- Transfusion of  $\geq 5$  units of whole blood or packed red blood cells within 48 hour period\*
- Chest tube output  $\geq 2$  L within a 24 hour period

Type 5a

- Probable fatal bleeding; no autopsy or imaging confirmation, but clinically suspicious

Type 5b

- Definite fatal bleeding: overt bleeding or autopsy or imaging confirmation

Obs: Platelet transfusions should be recorded and reported, but are not included in these definitions until further information is obtained about the relationship to outcomes. \*

Corrected for transfusion (1 U packed red blood cells or 1 U whole blood\_1g/dL haemoglobin). † Cell saver products will not be counted.

TIMI Bleeding Criteria

## Non-CABG related bleeding

- Major
  - o Any intracranial bleeding (excluding microhaemorrhages  $< 10$ mm evident only on gradient-echo MRI)
  - o Clinically overt signs of haemorrhage associated with a drop in haemoglobin of  $\geq 5$ g/dL
  - o Fatal bleeding (bleeding that directly results in death within 7 days)
- Minor
  - o Clinically overt (including imaging), resulting in haemoglobin drop of 3 to  $< 5$ g/dL
- Other non-major or minor
  - o Any overt bleeding event that does not meet the criteria above

## Bleeding in the setting of CABG

- Fatal bleeding (bleeding that directly results in death)
- Perioperative intracranial bleeding
- Reoperation after closure of the sternotomy incision for the purpose of controlling bleeding
- Transfusion of  $\geq 5$  U PRBCs or whole blood within a 48-h period; cell saver transfusion will not be counted in calculations of blood products.
- Chest tube output  $> 2$  L within a 24-h period

### GUSTO Bleeding Criteria

#### Severe or life-threatening

- o Intracerebral haemorrhage
- o Resulting in substantial hemodynamic compromise requiring treatment

#### Moderate

- o Requiring blood transfusion but not resulting in hemodynamic compromise

#### Mild

- o Bleeding that does not meet above criteria

## **DEATH**

All deaths will be categorized as cardiovascular, non-cardiovascular or undetermined based on the definitions below.

### Cardiovascular death

Cardiovascular Death is defined as death resulting from an acute myocardial infarction, sudden cardiac death, death due to heart failure, death due to stroke, death (immediate) due to cardiovascular (CV) procedures, death due to CV haemorrhage, and death due to other cardiovascular causes.

Death due to Acute Myocardial Infarction:

- Death by any mechanism (arrhythmia, heart failure, mechanical complication, low output) within 30 days after a myocardial infarction (MI) related to the immediate consequences of the myocardial infarction, such as progressive congestive heart failure

(CHF), inadequate cardiac output, or refractory arrhythmia. If these events occur after a “break” (e.g., a CHF and arrhythmia free period of at least a week), they should be designated by the immediate cause, even though the MI may have increased the risk of that event (e.g., late arrhythmic death becomes more likely after an acute myocardial infarction (AMI)). The acute myocardial infarction should be verified to the extent possible by the diagnostic criteria outlined for acute myocardial infarction or by autopsy findings showing recent myocardial infarction or recent coronary thrombus. Sudden cardiac death, if accompanied by symptoms suggestive of myocardial ischemia, new ST elevation, new LBBB, or evidence of fresh thrombus by coronary angiography and/or at autopsy should be considered death resulting from an acute myocardial infarction, even if death occurs before blood samples or 12-lead electrocardiogram (ECG) could be obtained, or at a time before the appearance of cardiac biomarkers in the blood. Death resulting from a procedure to treat a myocardial infarction percutaneous coronary intervention (PCI), coronary artery bypass graft surgery (CABG), or to treat a complication resulting from myocardial infarction, should also be considered death due to acute MI. Death resulting from an elective coronary procedure to treat myocardial ischemia (i.e. chronic stable angina) or death due to a MI that occurs as a direct consequence of a CV investigation/procedure/operation should be considered as a death due to a CV procedure.

#### Sudden Cardiac Death:

- Death that occurs unexpectedly, not following an acute AMI, and includes the following deaths:
  - o Death witnessed and occurring without new or worsening symptoms.
  - o Death witnessed within 60 minutes of the onset of new or worsening cardiac symptoms, unless documented (i.e. by ECG or other objective) to be due to acute myocardial infarction.

Death witnessed and attributed to an identified arrhythmia (e.g., captured on an electrocardiographic (ECG) recording, witnessed on a monitor, or unwitnessed but found on implantable cardioverter-defibrillator review). Death after unsuccessful resuscitation from cardiac arrest.

1  
2  
3 o Death after successful resuscitation from cardiac arrest and without identification  
4 of a non-cardiac aetiology.

5  
6 o Unwitnessed death without other cause of death (information regarding the  
7 patient's clinical status preceding death should be provided, if available).

8  
9  
10 General Considerations: A subject seen alive and clinically stable 24 hours prior to being  
11 found dead without any evidence or information of a specific cause of death should be  
12 classified as "sudden cardiac death." Typical scenarios include:

- 13  
14  
15 - Subject well the previous day but found dead in bed the next day.  
16  
17 - Subject found dead at home on the couch with the television on.  
18  
19 - Deaths for which there is no information beyond "Patient found dead at home"  
20 may be classified as "death due to other cardiovascular causes".

21  
22 Death due to Heart Failure or Cardiogenic Shock:

23  
24 • Death due to Congestive Heart Failure refers to a death in association with  
25 clinically worsening symptoms and/or signs of heart failure not following an acute MI  
26 (see section \*\*\*). Deaths due to heart failure can have various etiologies, including single  
27 or recurrent myocardial infarctions, ischemic or non-ischemic cardiomyopathy,  
28 hypertension, or valvular disease. Cardiogenic shock not occurring in the context of an  
29 acute myocardial infarction or as the consequence of an arrhythmia occurring in the  
30 absence of worsening heart failure is defined as systolic blood pressure (SBP) < 90 mm  
31 Hg for greater than 1 hour, not responsive to fluid resuscitation and/or heart rate  
32 correction, and felt to be secondary to cardiac dysfunction and associated with at least  
33 one of the following signs of hypoperfusion:-

- 34  
35  
36 o Cool, clammy skin or  
37  
38 o Oliguria (urine output < 30 mL/hour) or  
39  
40 o Altered sensorium or  
41  
42 o Cardiac index < 2.2 L/min/m<sup>2</sup>  
43  
44 o Cardiogenic shock can also be defined if SBP < 90 mm Hg and increases to ≥ 90  
45  
46 mm Hg in less than 1 hour with positive inotropic or vasopressor agents alone and/or  
47  
48 with mechanical support.

49  
50 Death due to Stroke refers to death after a stroke that is either a direct consequence of the  
51  
52

1  
2  
3 stroke or a complication of the stroke. Acute stroke should be verified to the extent  
4 possible by the diagnostic criteria outlined for stroke.

5  
6 Death due to Cardiovascular procedures refers to death caused by the immediate  
7 complications of a cardiac procedure and excludes death resulting from procedures to  
8 treat an acute MI or the complications resulting from an acute MI.

9  
10 Death due to Cardiovascular Haemorrhage refers to death related to haemorrhage such as  
11 a non-stroke intracranial haemorrhage, non-procedural or non-traumatic  
12 vascular rupture (e.g., aortic aneurysm), or haemorrhage causing cardiac tamponade.

13  
14 Death due to Other Cardiovascular Causes: Death due to Other Cardiovascular Causes  
15 refers to a cardiovascular death not included in the above categories (e.g., pulmonary  
16 embolism or peripheral arterial disease).

17  
18  
19  
20  
21  
22  
23  
24 Non-cardiovascular death:

25 Non-cardiovascular death is defined as any death that is not thought to be due to a  
26 cardiovascular cause. The following categories may be collected

- 27 - Non-Malignant Causes
- 28 - Pulmonary
- 29 - Renal
- 30 - Gastrointestinal
- 31 - Hepatobiliary
- 32 - Pancreatic
- 33 - Infection (includes sepsis)
- 34 - Non-infectious (e.g., systemic inflammatory response syndrome (SIRS))
- 35 - Haemorrhage\*, excluding haemorrhagic strokes and bleeding in the setting of  
36 coronary revascularization
- 37 - Non-cardiovascular procedure or surgery
- 38 - Accidental (e.g., physical accidents or drug overdose) or trauma
- 39 - Suicide
- 40 - Prescription Drug Error (e.g., prescribed drug overdose, use of inappropriate drug,  
41 or drug drug  
42 interaction)
- 43
- 44
- 45
- 46
- 47
- 48
- 49
- 50
- 51
- 52
- 53
- 54
- 55
- 56
- 57
- 58
- 59
- 60



- 1
- 2
- 3 - Neurological process that is not a stroke or haemorrhage
- 4
- 5 - Other non-cardiovascular, specify: \_\_\_\_\_
- 6

7 \*Examples: Death due to GI bleeding is not considered a CV death. Death due to  
8 retroperitoneal haematoma following PCI is considered CV death. Death due to  
9 intracerebral haemorrhage is considered CV death.

#### 11 Malignant Causes

12 Death results directly from the cancer;

13 OR

14 Death results from a complication of the cancer (e.g. infection, complication of surgery /  
15 chemotherapy / radiotherapy);

16 OR

17 Death results from withdrawal of other therapies because of concerns relating to the poor  
18 prognosis associated with the cancer

19 Cancer deaths may arise from cancers that were present prior to randomization or which  
20 developed subsequently should be further classified (worsening prior malignancy; new  
21 malignancy).

#### 22 Undetermined cause of death:

23 Undetermined cause of death refers to a death not attributable to one of the above  
24 categories of cardiovascular death or to a non-cardiovascular cause, due to absence of any  
25 information (e.g., the only available information is “patient died”). The use of this  
26 category of death is discouraged and should apply to a minimal number of cases when no  
27 information at all on the circumstances of death are available (i.e. found on obituary of  
28 local newspaper). In all circumstances the reviewer will use all available information to  
29 attribute to one of the categories based on best clinical judgment.

30  
31  
32  
33  
34  
35  
36  
37  
38  
39  
40  
41  
42  
43  
44  
45  
46  
47  
48 For each death event an assessment will be made as to whether the event was caused, on  
49 the basis of the totality of the evidence, by a bleeding (ie a a fatal bleeding occurred) or  
50 not.  
51  
52

#### 53 54 55 **MYOCARDIAL INFARCTION**

1  
2  
3 For the primary analysis, MI endpoint will be defined based on the third universal  
4 definition of myocardial infarction with the exception of peri-procedural MI after PCI,  
5 which will be defined according to the SCAI definition. 34,35  
6  
7

8 For secondary analyses, PCI-related MI according to the Third Universal MI definition  
9 (type 4a) will be also adjudicated.  
10  
11  
12

13  
14 1. Spontaneous MI (>48 hours after intervention, MI type 1)

15 Symptoms suggestive of ischemia/infarction in association with ECG, cardiac biomarker  
16 or pathologic evidence of infarction as follows:<sup>34</sup>  
17

18 • Detection of a rise and/or fall of cardiac biomarker values (preferably cardiac  
19 troponin T or I) with at least one value above the 99th percentile upper reference limit  
20 and with at least one of the following:  
21

22 • Symptoms of ischemia  
23

24 • New or presumed new significant ST segment-T wave (ST-T) changes or new  
25 LBBB.  
26  
27

28 • Development of new Q waves in the ECG  
29

30 Evidence of new loss of viable myocardium or new regional wall motion abnormality  
31

32 • Identification of an intracoronary thrombus by angiography or autopsy  
33

34 Spontaneous MI typically occurs after the periprocedural period and may be secondary to  
35 late stent complications or progression of native disease (e.g., non-culprit lesion plaque  
36 rupture). Performance of ECG and angiography supports adjudication to either a target or  
37 non-target vessel or lesion in most cases.  
38  
39  
40

41 Type 2 MI

42 In instances of myocardial injury with necrosis where a condition other than CAD  
43 contributes to an imbalance between myocardial oxygen supply and/or demand, e.g.  
44 coronary endothelial dysfunction, coronary artery spasm, coronary embolism,  
45 tachy/bradyarrhythmias, anemia, respiratory failure, hypotension, and hypertension with  
46 or without LVH.  
47  
48  
49  
50

51  
52  
53 *The distinction between type 1 and type 2 MI will be based by consensus on the*  
54 *preponderance of clinical evidence. The diagnosis of type 2 MI requires a predisposing*  
55  
56  
57

1  
2  
3 *condition as well as an acute Trigger of supply/demand imbalance, including acute*  
4 *anemia, respiratory failure, hypotension, sustained hypertension (with or without left*  
5 *ventricular hypertrophy), prolonged tachy- and brady-arrhythmias, coronary embolism,*  
6 *coronary artery spasm. If the evidence is conflicting or unclear, the MI will be classified*  
7 *as type 1.*  
8  
9  
10  
11  
12  
13  
14

### 15 Type 3 MI

16 Cardiac death with symptoms suggestive of myocardial ischaemia and presumed new  
17 ischaemic ECG changes or new LBBB, but death occurred before cardiac biomarkers  
18 were obtained, or before cardiac biomarker values would be increased.  
19  
20

21 Type 4a MI (NOT USED for primary analysis; see definition below)  
22  
23  
24

25 Type 4 MI is defined by elevation of cTn values ( $>5 \times \text{URL}$ ) occurring within 48h of the  
26 procedure in patients with normal baseline values ( $\leq \text{URL}$ ) or a rise of cTn values  $>20\%$  if  
27 the baseline values are elevated and are stable or falling.  
28  
29

30 In addition, at least one of the following is required:  
31

- 32 o symptoms suggestive of myocardial ischaemia
- 33 o new ischaemic ECG changes
- 34 o angiographic findings consistent with a procedural complication
- 35 o imaging demonstration of new loss of viable myocardium or new regional wall  
36 motion  
37 abnormality  
38  
39  
40  
41  
42  
43

### 44 Type 4b MI

45 Stent thrombosis associated with MI when detected by coronary angiography or autopsy  
46 in the setting of evidence of myocardial ischaemia and with a rise and/or fall of cardiac  
47 biomarker values with at least one value above the URL.  
48  
49  
50

### 51 Type 4c MI

52 A spontaneous MI where a restenosis is the only angiographic explanation  
53  
54  
55  
56  
57  
58  
59  
60

## Type 5 MI

Coronary artery bypass grafting (CABG) related MI is defined by elevation of troponin values ( $>10 \times \text{URL}$ ) occurring within 48h of the procedure in patients with normal baseline cTn values ( $\leq \text{URL}$ ).

In addition, at least one of the following is required:

- o new pathological Q waves or new LBBB
- o angiographic documented new graft or new native coronary artery occlusion
- o imaging evidence of new loss of viable myocardium or new regional wall motion abnormality.

## 2. Periprocedural MI after PCI (within 48 hours after PCI)

Periprocedural MI is defined based on the SCAI definitions as follows:

- 1) In patients with normal baseline CK-MB: The peak CK-MB measured within 48 hours of the procedure rises to  $\geq 10 \times$  the local laboratory ULN, or to  $\geq 5 \times$  ULN with new pathologic Q-waves in  $\geq 2$  contiguous leads or new persistent LBBB, OR in the absence of CK-MB measurements and a normal baseline cTn, a cTn (I or T) level measured within 48 hours of the PCI rises to  $\geq 70 \times$  the local laboratory ULN, or  $\geq 35 \times$  ULN with new pathologic Q-waves in  $\geq 2$  contiguous leads or new persistent LBBB. .
- 2) In patients with elevated baseline CK-MB (or cTn) in whom the biomarker levels are stable or falling: The CK-MB (or cTn) rises by an absolute increment equal to those levels recommended above from the most recent pre-procedure level.
- 3) In patients with elevated CK-MB (or cTn) in whom the biomarker levels have not been shown to be stable or falling: The CK-MB (or cTn) rises by an absolute increment equal to those levels recommended above plus new ST-segment elevation or depression plus signs consistent with a clinically relevant MI, such as new onset or worsening heart failure or sustained hypotension.

## STENT THROMBOSIS

1  
2  
3 Stent Thrombosis is defined by the Academic Research Consortium as follows:  
4  
5

6  
7 Definite stent thrombosis is considered to have occurred by either angiographic or  
8 pathological confirmation:  
9

10 a. Angiographic confirmation of stent thrombosis<sup>†</sup>

11 The presence of a thrombus<sup>‡</sup> that originates in the stent or in the segment 5 mm proximal  
12 or distal to the stent and presence of at least 1 of the following criteria within a 48-hour  
13 time window:  
14  
15

- 16 • Acute onset of ischemic symptoms at rest
- 17 • New ischemic ECG changes that suggest acute ischemia
- 18 • Typical rise and fall in cardiac biomarkers (refer to definition of spontaneous MI:  
19 Troponin or CK-MB > 99th percentile of URL)  
20
- 21 • Nonocclusive thrombus. Intracoronary thrombus is defined as a (spheric, ovoid,  
22 or irregular) noncalcified filling defect or lucency surrounded by contrast material (on 3  
23 sides or within a coronary stenosis) seen in multiple projections, or persistence of contrast  
24 material within the lumen, or a visible embolisation of intraluminal material downstream  
25
- 26 • Occlusive thrombus TIMI 0 or TIMI 1 intrastent or proximal to a stent up to the  
27 most adjacent proximal side branch or main branch (if originates from the side branch)  
28  
29  
30  
31  
32  
33  
34  
35

36 b. Pathological confirmation of stent thrombosis

37 Evidence of recent thrombus within the stent determined at autopsy or via examination of  
38 tissue retrieved following thrombectomy  
39  
40  
41

42  
43 <sup>†</sup>The incidental angiographic documentation of stent occlusion in the absence of clinical  
44 signs or symptoms is not considered a confirmed stent thrombosis (silent occlusion)

45 <sup>‡</sup>Intracoronary thrombus  
46  
47  
48

49 Probable stent thrombosis:

50 Clinical definition of probable stent thrombosis is considered to have occurred after  
51 intracoronary stenting in the following cases:  
52  
53

- 54 • Any unexplained death within the first 30 days.  
55  
56  
57  
58  
59  
60

- 1  
2  
3 • Irrespective of the time after the index procedure, any myocardial infarction (MI)  
4 which is related to documented acute ischemia in the territory of the implanted stent  
5 without angiographic confirmation of stent thrombosis and in the absence of any other  
6 obvious cause.  
7  
8  
9

10  
11 Possible stent thrombosis:

12 Clinical definition of possible stent thrombosis is considered to have occurred with any  
13 unexplained death from 30 days following intracoronary stenting until end of trial follow  
14 up.  
15  
16  
17  
18

## 19 20 **STROKE**

21 Stroke is defined as an acute episode of focal or global neurological dysfunction caused  
22 by  
23 central nervous system (CNS) vascular injury as a result of hemorrhage or infarction.  
24  
25 CNS includes brain, spinal cord and retina.  
26  
27

28 Classification:

### 29 30 Ischemic Stroke

31 Ischaemic stroke is defined as an acute episode of focal cerebral, spinal, or retinal  
32 dysfunction caused by CNS infarction. Evidence of infarction is defined as "Pathological,  
33 imaging, or other objective evidence of acute cerebral, spinal cord, or retinal focal  
34 ischemic injury in a defined vascular distribution; or in absence of the above (i.e. imaging  
35 or autopsy unavailable), clinical evidence of cerebral, spinal cord, or retinal focal  
36 ischemic injury is based on symptoms persisting  $\geq 24$  hours or until death, and other  
37 etiologies excluded.  
38  
39  
40  
41  
42  
43

44 Note, Haemorrhagic infarction, defined as a parenchymal hemorrhage after CNS  
45 infarction, is considered an ischaemic stroke

### 46 47 Cerebral Haemorrhage

48 Hemorrhages in the CNS are classified as stroke if they are non-traumatic, caused by a  
49 vascular event, and result in injury to the CNS. In contrast, traumatic hemorrhages will  
50 not be characterized as stroke. Subdural hematoma will not be classified as a stroke. The  
51  
52  
53  
54  
55  
56  
57  
58  
59  
60

1  
2  
3 diagnoses included in this section are intracerebral hemorrhage (intra-parenchymal and  
4 intraventricular) and subarachnoid hemorrhage (both aneurysmal and non-aneurysmal).

5  
6 Stroke caused by intracerebral haemorrhage

7  
8 Rapidly developing clinical signs of neurological dysfunction (focal or global)  
9  
10 attributable to a focal collection of blood within the brain parenchyma or ventricular  
11  
12 system that is not caused by trauma.

13  
14 Stroke caused by subarachnoid haemorrhage

15  
16 Rapidly developing signs of neurological dysfunction (focal or global) and/or headache  
17  
18 because of bleeding into the subarachnoid space (the space between the arachnoid  
19  
20 membrane and the pia mater of the brain or spinal cord), which is not caused by trauma.  
21  
22 Haemorrhages may be further classified according to location (example, supratentorial,  
23  
24 subtentorial, etc.)

25  
26 Stroke not otherwise specified

27  
28 An episode of acute neurological dysfunction presumed to be caused by ischemia or  
29  
30 haemorrhage, persisting  $\geq 24$  hours or until death, but without sufficient evidence to be  
31  
32 classified as one of the above.  
33

### 34 **URGENT TARGET VESSEL REVASCULARIZATION**

35  
36  
37 A urgent target vessel revascularization (TVR) is a urgent coronary revascularization in a  
38  
39 target coronary vessel (ie a vessel treated during the index PCI). Urgent coronary  
40  
41 revascularization is defined as follows:

42  
43 One or more episodes of rest pain, presumed to be ischemic in origin, which results in  
44  
45 either urgent repeat PCI or urgent CABG. In the absence of pain, new ST segment  
46  
47 changes (a new ST segment shift  $> 0.05$  mV (0.5 mm) on a 12-lead ECG), indicative of  
48  
49 ischemia, acute pulmonary oedema, ventricular arrhythmias, or hemodynamic instability  
50  
51 presumed to be ischemic in origin, will constitute sufficient evidence of ischemia. To be  
52  
53 considered urgent, the repeat PCI or CABG will be initiated within 24 hours of the last  
54  
55 episode of ischemia and not be identified as planned/staged. The episode of ischemia  
56  
57 leading to urgent repeat PCI must occur following completion of the index PCI and guide

wire removal. CABG initiated within 24 hours of PCI (index or repeat) due to an unsatisfactory result, even in the absence of documented ischemia, will also be considered a urgent coronary revascularization endpoint.

### **GLASSY participating sites**

| <i>Country</i> | <i>Site</i>                    | <i>PI</i>            |
|----------------|--------------------------------|----------------------|
| Belgium        | JESSAZIEKENHUIS                | Edouard Benit        |
| Germany        | Kerckhoff Heart Center         | Christoph Liebetrau  |
| Belgium        | Imelda Ziekenhuis              | Luc Janssens         |
| Italy          | Policlinico San Matteo         | Maurizio Ferrario    |
| Switzerland    | Uni. Hospital Bern             | Stephan Windecker    |
| Poland         | PAKS Chrzanów                  | Zurkowski Aleksander |
| Netherlands    | Erasmus MC R'dam               | Robert Jan van Geuns |
| Italy          | Ospedaliera S. Maria           | Marcello Dominici    |
| Austria        | Wilhelminenspital              | Kurt Huber           |
| Netherlands    | OLVG A'dam                     | Ton Slagboom         |
| Poland         | PAKS Dabrowa                   | Paweł Buszman        |
| Italy          | Ospedale S. Donato             | Leonardo Bolognese   |
| Italy          | Azienda Ospedaliero di Ferrara | Carlo Tumscitz       |
| Poland         | JP2 Krakov                     | Krzysztof Żmudka     |
| Belgium        | CHU de Charleroi               | Adel Aminian         |
| Belgium        | ZOL St.Jan                     | Mathias Vrolix       |
| Bulgaria       | City Clinic Sofia              | Ivo Petrov           |
| UK             | Royal Blackburn                | Scot Garg            |
| Germany        | Rhein Ruhr Center              | Christoph Naber      |
| Poland         | PAKS Kozle                     | Janusz Prokopczuk    |



1  
2  
3  
4  
5  
6  
7  
8  
9  
10  
11  
12  
13  
14  
15  
16  
17  
18  
19  
20  
21  
22  
23  
24  
25  
26  
27  
28  
29  
30  
31  
32  
33  
34  
35  
36  
37  
38  
39  
40  
41  
42  
43  
44  
45  
46  
47  
48  
49  
50  
51  
52  
53  
54  
55  
56  
57  
58  
59  
60

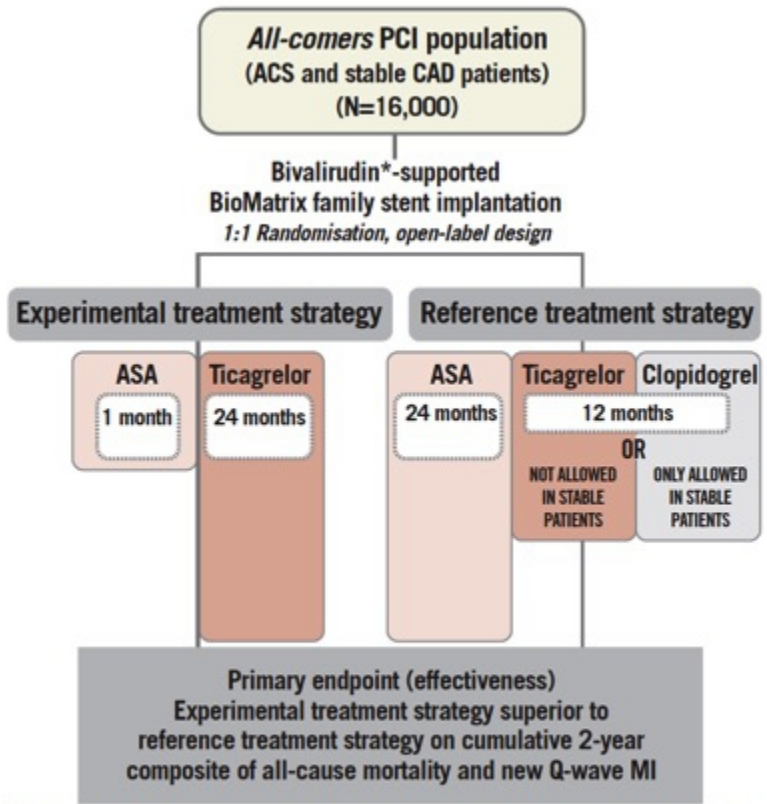

**IMPORTANT:** In the Reference treatment strategy arm, ticagrelor is not allowed in stable patients, and clopidogrel must be given in combination with ASA. However, patients already on stable maintenance treatment with ticagrelor (or prasugrel) can continue with ticagrelor treatment (for 12 months post index PCI).

*\*In countries where available.*

GLOBAL LEADERS design

33x40mm (300 x 300 DPI)

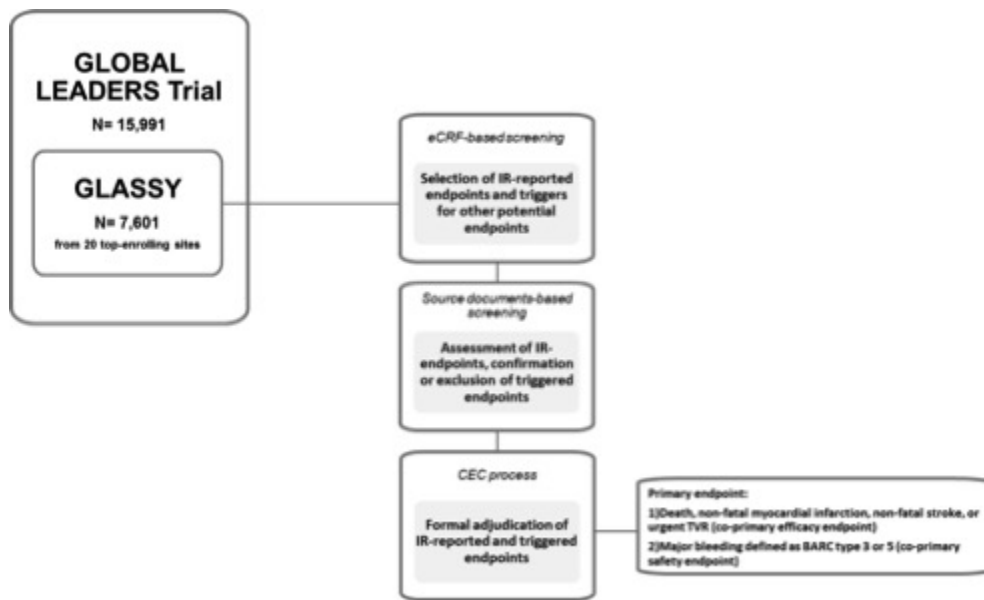

GLASSY Design

41x25mm (300 x 300 DPI)

# BMJ Open

## Rationale and Design of a Prospective Sub-Study of Clinical Endpoint Adjudication Processes Within an Investigator-Reported Randomized Controlled Trial in Patients with Coronary Artery Disease: The GLOBAL LEADERS Adjudication Sub-Study – GLASSY

|                               |                                                                                                                                                                                                                                                                                                                                                                                                                                                                                                                                                                                                                                                                                                                                                                                                                                                                                                                                                                                                                                                                                                                                                                                                                                                                                                                                                                                                                                                                                                                                                                                                                                                                                                                                                                                                                                                                                                                                                                                                                                                                                                                                                                                                                                                                         |
|-------------------------------|-------------------------------------------------------------------------------------------------------------------------------------------------------------------------------------------------------------------------------------------------------------------------------------------------------------------------------------------------------------------------------------------------------------------------------------------------------------------------------------------------------------------------------------------------------------------------------------------------------------------------------------------------------------------------------------------------------------------------------------------------------------------------------------------------------------------------------------------------------------------------------------------------------------------------------------------------------------------------------------------------------------------------------------------------------------------------------------------------------------------------------------------------------------------------------------------------------------------------------------------------------------------------------------------------------------------------------------------------------------------------------------------------------------------------------------------------------------------------------------------------------------------------------------------------------------------------------------------------------------------------------------------------------------------------------------------------------------------------------------------------------------------------------------------------------------------------------------------------------------------------------------------------------------------------------------------------------------------------------------------------------------------------------------------------------------------------------------------------------------------------------------------------------------------------------------------------------------------------------------------------------------------------|
| Journal:                      | <i>BMJ Open</i>                                                                                                                                                                                                                                                                                                                                                                                                                                                                                                                                                                                                                                                                                                                                                                                                                                                                                                                                                                                                                                                                                                                                                                                                                                                                                                                                                                                                                                                                                                                                                                                                                                                                                                                                                                                                                                                                                                                                                                                                                                                                                                                                                                                                                                                         |
| Manuscript ID                 | bmjopen-2018-026053.R1                                                                                                                                                                                                                                                                                                                                                                                                                                                                                                                                                                                                                                                                                                                                                                                                                                                                                                                                                                                                                                                                                                                                                                                                                                                                                                                                                                                                                                                                                                                                                                                                                                                                                                                                                                                                                                                                                                                                                                                                                                                                                                                                                                                                                                                  |
| Article Type:                 | Protocol                                                                                                                                                                                                                                                                                                                                                                                                                                                                                                                                                                                                                                                                                                                                                                                                                                                                                                                                                                                                                                                                                                                                                                                                                                                                                                                                                                                                                                                                                                                                                                                                                                                                                                                                                                                                                                                                                                                                                                                                                                                                                                                                                                                                                                                                |
| Date Submitted by the Author: | 20-Nov-2018                                                                                                                                                                                                                                                                                                                                                                                                                                                                                                                                                                                                                                                                                                                                                                                                                                                                                                                                                                                                                                                                                                                                                                                                                                                                                                                                                                                                                                                                                                                                                                                                                                                                                                                                                                                                                                                                                                                                                                                                                                                                                                                                                                                                                                                             |
| Complete List of Authors:     | <p>Leonardi, Sergio; Fondazione IRCCS Policlinico San Matteo, Franzone, Anna; Federico II University of Naples, Department of Advanced Biomedical Sciences<br/>         Piccolo, Raffaele; Federico II University of Naples, Department of Advanced Biomedical Sciences<br/>         McFadden, Eugene; Cork University Hospital Group, Department of Cardiology<br/>         Vranckx, Pascal; Hartcentrum Hasselt, Department of Cardiology and Critical Care Medicine<br/>         Serruys, Patrick; Imperial College of London, Department of Cardiology<br/>         Benit, Edouard; Jessa Hospital, Cardiology<br/>         Liebetau, Christoph; Kerckhoff Heart and Thorax Centre, Cardiology<br/>         Janssens, Luc; Imelda Hospital, Cardiology<br/>         Ferrario, Maurizio; Fondazione IRCCS Policlinico San Matteo<br/>         Zurakowski, Aleksander; American Heart of Poland, Center of Cardiovascular Research and Development<br/>         van Geuns, Robert-Jan; Erasmus MC, Cardiology<br/>         Dominici, Marcello; S. Maria" University-Hospital, Cardiology<br/>         Huber, Kurt; Wilhelminenhospital, 3rd Med Dept, Cardiology and Emergency Medicine<br/>         Slagboom, Ton; OLVG, Cardiology<br/>         Buszman, Paweł; American Heart of Poland, Center for Cardiovascular Research and Development<br/>         Bolognese, Leonardo; Azienda Toscana USL Sudest, Cardiology<br/>         Tumscitz, carlo; Azienda Ospedaliero Universitaria di Ferrara Arcispedale Sant'Anna, Cardiology<br/>         Bryniarski, Krzysztof ; The John Paul II Hospital, Jagiellonian University Medical College<br/>         Aminian, Adel; Centre hospitalier universitaire de Charleroi, Cardiology<br/>         Vrolix, Mathias ; Ziekenhuis Oost-Limburg, Cardiology<br/>         Petrov, Ivo; Adzhibadem Siti Klinik Surdechno-sudovi Center, Cardiology<br/>         Garg, Scot; East Lancashire Hospitals NHS Trust, Cardiology<br/>         Naber, Christoph ; Contilia Heart and Vascular Centre, Cardiology and Angiology<br/>         Prokopczuk, Janusz ; PAKS Kozle, Cardiology<br/>         Hamm, Christian; Kerckhoff Heart Center,<br/>         Steg, Gabriel; Assistance Publique-Hôpitaux de Paris, Hôpital Bichat</p> |

|                                                    |                                                                                                                                                                                                                                                                                                                                                        |
|----------------------------------------------------|--------------------------------------------------------------------------------------------------------------------------------------------------------------------------------------------------------------------------------------------------------------------------------------------------------------------------------------------------------|
|                                                    | Heg, Dierik; Institute of Social and Preventive Medicine and Clinical Trials Unit, CTU<br>Juni, Peter; Applied Health Research Centre, Li Ka Shing Knowledge Institute of St Michael's Hospital, Medicine<br>Windecker, Stephan; Inselspital Universitatsspital Bern, Cardiology<br>Valgimigli, Marco; Inselspital Universitatsspital Bern, Cardiology |
| <b>&lt;b&gt;Primary Subject Heading&lt;/b&gt;:</b> | Cardiovascular medicine                                                                                                                                                                                                                                                                                                                                |
| Secondary Subject Heading:                         | Cardiovascular medicine                                                                                                                                                                                                                                                                                                                                |
| Keywords:                                          | Coronary heart disease < CARDIOLOGY, Coronary intervention < CARDIOLOGY, Ischaemic heart disease < CARDIOLOGY, Myocardial infarction < CARDIOLOGY                                                                                                                                                                                                      |
|                                                    |                                                                                                                                                                                                                                                                                                                                                        |

SCHOLARONE™  
Manuscripts

1  
2  
3  
4  
5  
6  
7  
8  
9  
10  
11  
12

## **Rationale and Design of a Prospective Sub-Study of Clinical Endpoint Adjudication Processes Within an Investigator-Reported Randomized Controlled Trial in Patients with Coronary Artery Disease: The GLOBAL LEADERS Adjudication Sub-Study – GLASSY**

13 Sergio Leonardi MD, MHS<sup>1,\*</sup>; Anna Franzone MD, PhD<sup>2,3,\*</sup>; Raffaele Piccolo MD,  
14 PhD<sup>2,3</sup>; Eugene McFadden MD<sup>4,5</sup>; Pascal Vranckx, MD, PhD<sup>6</sup>; Patrick W. Serruys  
15 MD, PhD<sup>7</sup>; Edouard Benit, MD<sup>8</sup>; Christoph Liebetrau, MD<sup>9</sup>; Luc Janssens, MD<sup>10</sup>;  
16 Maurizio Ferrario, MD<sup>1</sup>; Aleksander Zurakowski, MD<sup>11</sup>; Robert Jan van Geuns,  
17 MD<sup>12</sup>; Marcello Dominici, MD<sup>13</sup>; Kurt Huber, MD<sup>14</sup>; Ton Slagboom, MD<sup>15</sup>;  
18 Paweł Buszman, MD<sup>16</sup>; Leonardo Bolognese, MD<sup>17</sup>; Carlo Tumscitz, MD<sup>18</sup>;  
19 Krzysztof Bryniarski, MD, PhD<sup>19</sup>; Adel Aminian, MD<sup>20</sup>; Mathias Vrolix, MD<sup>21</sup>;  
20 Ivo Petrov, MD<sup>22</sup>; Scot Garg, MD<sup>23</sup>; Christoph Naber, MD<sup>24</sup>; Janusz Prokopczuk,  
21 MD<sup>25</sup>; Christian Hamm, MD<sup>26</sup>; Gabriel Steg, MD<sup>27</sup>; Dierik Heg, PhD<sup>28</sup>; Peter Juni,  
22 MD<sup>29</sup>; Stephan Windecker, MD<sup>2</sup>; Marco Valgimigli, MD, PhD<sup>2</sup>

23  
24  
25  
26  
27  
28  
29  
30  
31  
32  
33  
34  
35  
36

*\*: These authors contributed equally to this manuscript.*

37 1: Fondazione IRCCS Policlinico S.Matteo, Pavia, Italy; 2: Department of Cardiology, Bern University  
38 Hospital, Bern, Switzerland; 3: Department of Advanced Biomedical Sciences, Federico II University of  
39 Naples, Naples, Italy; 4: Cardialysis Core Laboratories and Clinical Trial Management, Rotterdam, the  
40 Netherlands; 5: Department of Cardiology, Cork University Hospital, Cork, Ireland; 6: Department of  
41 Cardiology and Critical Care Medicine, Hartcentrum Hasselt, Jessa Ziekenhuis, Belgium; 7: Department of  
42 Cardiology, Imperial College of London, UK; 8: Jessa Hospital, Department of Cardiology, Hasselt,  
43 Belgium; 9: Department of Cardiology, Kerckhoff Heart and Thorax Center, Bad Nauheim, Germany; 10:  
44 Imelda Hospital, Bonheiden, Belgium; 11: Center of Cardiovascular Research and Development, American  
45 Heart of Poland, Katowice, Poland; 12: Thoraxcenter, Erasmus Medical Center, Rotterdam, the  
46 Netherlands; 13: "S. Maria" University-Hospital, Terni, Italy; 14: 3rd Medical Department, Cardiology,  
47 Wilhelminenhospital, and Sigmund Freud University. Medical School, Vienna, Austria; 15: OLVG  
48 Amsterdam, Amsterdam, the Netherlands; 16: Center for Cardiovascular Research and Development  
49 American Heart of Poland, Poland; 17: Azienda Toscana Usl Sudest Arezzo Italy; 18: Cardiology Unit  
50 Sant'Anna Hospital, Ferrara, Italy; 19: Jagiellonian University Medical College, The John Paul II Hospital,  
51  
52  
53  
54  
55  
56  
57

1  
2  
3 Krakow, Poland; 20: Department of cardiology, Centre Hospitalier Universitaire de Charleroi, Charleroi,  
4 Belgium; 21: Ziekenhuis Oost Limburg, Genk, Belgium; 22: Acibadem City Clinic Cardiovascular Center,  
5 Sofia, Bulgaria; 23: East Lancashire Hospitals NHS Trust, Blackburn, UK; 24: Contilia Heart and Vascular  
6 Centre, Department of Cardiology and Angiology, Elisabeth Krankenhaus Essen, Germany; 25: PAKS  
7 Kozle, Poland; 26: Department of Cardiology, Kerckhoff Heart and Thorax Center, Bad Nauheim,  
8 Germany; 27: Hôpital Bichat-Claude Bernard, Paris, France; 28: Institute of Social and Preventive  
9 Medicine and Clinical Trials Unit, University of Bern, Bern, Switzerland; 29: Applied Health Research  
10 Centre, Li Ka Shing Knowledge Institute of St Michael's Hospital, Department of Medicine, University of  
11 Toronto, Ontario, Canada  
12  
13  
14  
15  
16  
17  
18  
19

20 **Corresponding Author:**

21 Marco Valgimigli, MD, PhD  
22 Department of Cardiology  
23 Bern University Hospital,  
24 Freiburgstrasse 4, 3010 Bern  
25 Switzerland  
26 Phone: +41 316324714  
27 E-Mail: [marco.valgimigli@insel.ch](mailto:marco.valgimigli@insel.ch)  
28  
29  
30  
31  
32  
33  
34  
35  
36  
37  
38  
39  
40  
41  
42  
43  
44  
45  
46  
47  
48  
49  
50  
51  
52  
53  
54  
55  
56  
57  
58  
59  
60

## Abstract (299 of 300 words)

**Introduction:** The GLOBAL LEADERS is an open-label, pragmatic and superiority randomized controlled trial designed to challenge the current treatment paradigm of dual antiplatelet therapy (DAPT) for 12 months followed by aspirin monotherapy among patients undergoing percutaneous coronary intervention (PCI). By design, all study endpoints are investigator-reported (IR) and not subject to formal adjudication by an independent Clinical Event Committee (CEC), which may introduce detection, reporting, or ascertainment bias.

**Methods and Analysis:** We designed the GLOBAL LEADERS Adjudication Sub-Study (GLASSY) to prospectively implement, in a large sample of patients enrolled within the GLOBAL LEADERS trial (7,601 of 15,991, 47.5%), an independent adjudication process of reported and unreported potential endpoints, using standardized CEC procedures, in order to assess whether 23-month ticagrelor monotherapy (90 mg BID) after 1-month DAPT is non-inferior to a standard regimen of DAPT for 12 months followed by aspirin monotherapy for the primary efficacy endpoint of death, non-fatal myocardial infarction, non-fatal stroke, or urgent target-vessel revascularization, and superior for the primary safety endpoint of type 3 or 5 bleeding according to the Bleeding Academic Research Consortium (BARC) criteria.

This study will comprehensively assess the comparative safety and efficacy of the two tested antithrombotic strategies on CEC-adjudicated ischemic and bleeding endpoints and will provide insights into the role of a standardized CEC adjudication process on the interpretation of study findings by quantifying the level of concordance between IR-reported and CEC-adjudicated events.

**Ethics and Dissemination:** GLASSY has been approved by local ethics committee of all study sites and/or by the central ethics committee for the country depending on country-specific regulations. In all cases, they deemed that it was not necessary to obtain further informed consent from individual subjects. The study has been registered on ClinicalTrials.Gov NCT01813435, a website that will be also used for reporting of study results and dissemination.

## Strengths and limitations of this study

- GLASSY is a comprehensive, rigorous, and standardized assessment of several non-fatal endpoints as well as death (including type, mechanism, and relationship to bleeding) in a representative sample of the GLOBAL LEADERS trial performed according to best practices of adjudication.
- An intrinsic limitation is that GLOBAL LEADERS has been designed as an IR-only study. Therefore, systematic identification of study endpoints is limited by the eCRF and relies on source documentation provided by the site, which reduces the ability to identify all possible potential endpoints.
- For feasibility, GLASSY will be conducted in a sample rather than the entire parent study, which may bias the study toward the null hypothesis of no difference between IR- and CEC-adjudicated endpoint by selecting best enrolling sites. While this bias is possible, the relatively large study sample ( $\approx 50\%$  of the parent study) makes this possibility unlikely.

## Rationale

The prolonged combination of aspirin and a P2Y<sub>12</sub> receptor inhibitor, typically for 12 months, represents the established antiplatelet therapy in patients with or without acute coronary syndrome (ACS) undergoing percutaneous coronary intervention (PCI) with drug-eluting stent implantation.<sup>1</sup> Clopidogrel, an inconsistent P2Y<sub>12</sub> receptor inhibitor<sup>2</sup> with considerable variability in inter-patient response,<sup>3</sup> proved inferior to stronger and more consistent P2Y<sub>12</sub> inhibitors, such as ticagrelor, in preventing ischemic and thrombotic cardiovascular events among patients with ACS.<sup>4</sup> With the introduction and widespread adoption in clinical practice of more potent P2Y<sub>12</sub> inhibitors, it has been hypothesized that the addition of aspirin may yield little additional inhibition of platelet aggregation and marginal incremental clinical benefit compared with a strategy based on potent P2Y<sub>12</sub> receptor inhibitor-monotherapy.<sup>5,6</sup> This led to the hypothesis that ticagrelor monotherapy may have similar efficacy compared with the combination of aspirin and ticagrelor and be better tolerated.



1  
2  
3 The GLOBAL LEADERS trial was designed to challenge the current treatment  
4 paradigm consisting of 12-month dual antiplatelet therapy (DAPT; clopidogrel+aspirin  
5 among patients with stable CAD; ticagrelor+aspirin among patients with ACS) followed  
6 by aspirin monotherapy in patients undergoing PCI based on the superiority for the  
7 composite endpoint of all-cause death or Q-wave myocardial infarction (MI) assessed at  
8 2 years.<sup>7</sup> It is an open-label, randomized comparison testing an innovative antithrombotic  
9 regimen of 23-month ticagrelor 90 mg twice daily monotherapy after 1-month DAPT  
10 (ticagrelor 90 mg twice daily plus low-dose aspirin) against conventional 12-month  
11 DAPT in all-comer patients undergoing PCI with bivalirudin-supported, biolimus-eluting  
12 stent implantation. The GLOBAL LEADERS is a pragmatic clinical trial and, by design,  
13 all study endpoints are investigator-reported (IR) and therefore not adjudicated by an  
14 independent Clinical Event Committee (CEC). Only new Q-wave MI will be identified  
15 by independent core lab assessment and validated by a physician blinded to treatment  
16 allocation. All other endpoints, including specific causes of mortality, non-Q wave MI,  
17 stroke, stent thrombosis, and bleeding will be analyzed as reported by the local  
18 investigators.

19  
20 Although the use of IR endpoints in a phase III randomized trial is a simple and  
21 less expensive alternative, their sole use has potential to introduce detection, reporting, or  
22 ascertainment bias, especially in the absence of blinding to randomized treatment (i.e. in  
23 an open-label design as in the case of the GLOBAL LEADERS trial). This might  
24 challenge the interpretation of the GLOBAL LEADERS study results, especially as it  
25 relates to the effect of the randomly allocated treatment on non-fatal clinical endpoints.  
26 Moreover, the design of GLOBAL LEADERS also raises important questions regarding  
27 bleeding adverse events that may differ between groups.

28  
29 We, therefore, designed the GLOBAL LEADERS Adjudication Sub-Study  
30 (GLASSY) with the aim to prospectively implement, in a representative sample of  
31 patients enrolled within the GLOBAL LEADERS trial, an independent adjudication  
32 process of reported as well as unreported potential endpoints, leveraging on standardized  
33 CEC procedures. This GLASSY substudy is powered to test whether 23-month ticagrelor  
34 monotherapy after a short course of DAPT for 1 month is non-inferior to conventional  
35 12-month DAPT followed by aspirin monotherapy with respect to CEC-adjudicated

1  
2  
3 death, non-fatal myocardial infarction, non-fatal stroke, or urgent target-vessel  
4 revascularization (TVR) and superior in preventing CEC-adjudicated major bleeding.  
5 Furthermore, GLASSY will evaluate the implications of the CEC adjudication process  
6 for the interpretation of study results by quantifying the level of concordance between IR-  
7 reported and CEC-adjudicated events and will define the role of CEC adjudication  
8 process for the assessment of the efficacy and safety of the randomized antithrombotic  
9 strategies on a broader set of fatal and non-fatal clinical endpoints.  
10  
11  
12  
13  
14  
15

## 16 17 **Design**

### 18 19 **Parent Study**

20  
21 The GLOBAL LEADERS study is a superiority, open-label, multicenter, randomized  
22 controlled trial in an all-comer population of patients, presenting with ACS or stable  
23 coronary artery disease, undergoing PCI with the uniform use of Biolimus A9-eluting  
24 stents (BioMatrix™ BES; Biosensors Europe SA, Morges, Switzerland) and receiving  
25 bivalirudin at the time of the index procedure (**Figure 1**). A total of 15,991 patients have  
26 been randomly assigned 1:1 to ticagrelor 90 mg twice daily for 24 months plus aspirin  
27  $\leq 100$  mg daily for 1 month (experimental arm) or standard DAPT with either ticagrelor,  
28 in case of ACS, or clopidogrel, in case of stable coronary artery disease, for 12 months  
29 plus aspirin  $\leq 100$  mg daily for 24 months (control arm). All study endpoints are  
30 investigator-reported with randomization stratified by enrolling site as well as clinical  
31 presentation. The primary endpoint of the GLOBAL LEADERS is the composite of all-  
32 cause death or new Q-wave myocardial infarction at 24 months. The presence and date of  
33 new Q wave MI will be identified by an independent ECG core laboratory and validated  
34 by a single physician blinded to treatment allocation using adverse events reported in the  
35 eCRF supplemented, if required, by additional source documents. The key safety  
36 endpoint is investigator-reported class 3 or 5 bleeding according to the Bleeding  
37 Academic Research Consortium (BARC) definitions. Other secondary endpoints include  
38 stroke, MI, coronary revascularization, and definite stent thrombosis. As pragmatic trial,  
39 GLOBAL LEADERS implemented a risk-based monitoring process for site-based  
40  
41  
42  
43  
44  
45  
46  
47  
48  
49  
50  
51  
52  
53  
54  
55  
56  
57  
58  
59  
60

operational activities favoring centralized remote monitoring rather than in-person on-site monitoring. GLOBAL LEADERS terminated enrollment on November, 9<sup>th</sup> 2015.

## Objectives

The primary objective of the GLASSY is to assess, in a representative subgroup of patients enrolled within the GLOBAL LEADERS study, whether 23-month ticagrelor monotherapy after a short course of DAPT (1 month) is non-inferior to conventional 12-month DAPT followed by aspirin monotherapy for the composite endpoint of CEC-adjudicated all-cause death, non-fatal MI, non-fatal stroke, or urgent TVR, and superior in preventing CEC-adjudicated major bleeding (BARC type 3 and 5) in an all-comers population undergoing PCI at 24 months (**Figure 2**). A secondary objective is to quantify the level of concordance between IR- and CEC-adjudicated endpoints.

## Endpoints

GLASSY will have two independent, CEC-adjudicated, co-primary endpoints at 24 months:

- 1) The composite of death, non-fatal MI, non-fatal stroke, or urgent TVR (co-primary efficacy endpoint);
- 2) The composite of BARC type 3 or 5 bleeding (co-primary safety endpoint).

Secondary endpoints will include:

- Each component of the co-primary composite endpoints;
- Definite, probable or possible stent thrombosis according to ARC classification;
- Bleeding events according to BARC (primary safety endpoint) as well as the alternative TIMI and GUSTO classifications;
- Type of death (cardiovascular vs. non-cardiovascular and subtypes).

## Clinical Event Committee Procedures

According to best adjudication practice,<sup>8</sup> GLASSY is being conducted according to the following features:

**1. Prospective approach to adjudication.** The CEC dataset will be locked before the termination of the parent study. Suspected events (triggers) will be assessed during the conduct of the study rather than adjudicating all cases after the study is completed and the

1  
2  
3 primary results are available (i.e. retrospective adjudication). In case of updated entry of  
4 suspected events or updated source documentation by the site after request by the CEC  
5 team of source documentation, events will be re-evaluated for adjudication.  
6  
7  
8  
9

10 **2. Blinding of randomized treatment allocation.** According to the PROBE  
11 methodology,<sup>9,10</sup> the CEC will be blinded to randomized treatment allocation.  
12 Several steps will be undertaken to ensure that the CEC personnel and physicians remain  
13 blinded.  
14  
15

16  
17 *First*, any reference to treatment assignment contained in the eCRF or source  
18 documents that could lead to un-blinding of treatment assignment will be obliterated by  
19 using a black marker by the site prior to submission to the CEC physician members.  
20  
21

22 *Second*, the CEC coordinator and operation personnel will obliterate any  
23 reference to study drug assignment prior to distribution to the physicians if information is  
24 noted during the preparation of the event packet.  
25  
26

27 *Third*, if a reviewer notes the treatment assignment during the review of a  
28 particular event, the CEC coordinator is notified, and the event is sent for review by the  
29 third expert reviewer.  
30  
31  
32  
33

34 **3. Triggering and adjudication of investigator- as well as non-investigator reported**  
35 **events.**  
36

37 All IR-events (death, MI, stroke, bleeding, coronary revascularization, and stent  
38 thrombosis) will be adjudicated by the CEC through dedicated CRFs (online Appendix).  
39 We will also use comprehensive search strategies for potential cardiovascular events that  
40 are not reported by the investigator via eCRF dedicated queries. Indeed, it may happen  
41 that patients without IR-events or triggers may have experienced an event qualifying for  
42 the endpoints of the GLASSY study.<sup>10</sup>  
43  
44  
45  
46  
47

48 It is possible that the request of source documentation may trigger endpoint  
49 reporting (and bias the study toward the null hypothesis). To quantify this, IR endpoints  
50 entered after CEC requested source documentation will be monitored and reported.  
51  
52  
53  
54  
55  
56  
57  
58  
59  
60

1  
2  
3  
4 **4. Independent voting processes** by CEC members with at least 3 CEC members (see  
5 Appendix A) with knowledge of the geographic variations of care represented in the trial.  
6 Each event will be reviewed independently by at least two CEC physicians. In case of  
7 disagreement, the event will be reviewed by a Committee of at least 3 reviewers with  
8 independent vote.  
9  
10

#### 11 12 13 14 **5. Independence from parent study.**

15 To maximize the scientific integrity of GLASSY, CEC personnel will operate  
16 independently from the data management group of the parent study, including no cross  
17 talk on trigger logic specifications, query processes for source documentation, and most  
18 importantly event reporting and adjudication results.  
19  
20  
21  
22

#### 23 24 **6. Quantification of sufficient evidence for adjudication of non-fatal triggers** (NO 25 versus UNKNOWN events). 26

27 Finally, we will quantify the minimum amount of evidence required for the  
28 assessment of non-fatal endpoints. In a randomized trial, a pre-requisite to assess whether  
29 a suspected non-fatal endpoint has occurred or not is the availability of sufficient  
30 evidence for such an assessment, including relevant source documents, tests, and/or  
31 laboratory exams. While this is commonly performed for fatal events (death is  
32 adjudicated as “unknown” in case of no or insufficient description of death  
33 circumstances), it is not generally mandatory for non-fatal events.  
34  
35  
36  
37  
38

39 In GLASSY, we will report all non-fatal endpoints but for each non-fatal trigger  
40 examined an assessment will be performed as to whether enough information is available  
41 for formal adjudication. This will allow distinguishing triggers that did not meet the  
42 endpoint definition (i.e. no event with sufficient documentation present) from triggers for  
43 which this is unknown due to insufficient documentation. For each type of non-fatal  
44 endpoint, the proportion of events with insufficient evidence will indirectly estimate a)  
45 the feasibility of GLASSY b) the quality of endpoint reported by sites and c) the  
46 uncertainty of the evidence related to the studied outcome.  
47  
48  
49  
50  
51  
52

53 Sufficient evidence for CEC adjudication includes at a minimum a narrative  
54 description with at least one pertinent medical documentation, including ECG/biomarkers  
55  
56  
57  
58  
59  
60

1  
2  
3 for MI; angiographic report for stent thrombosis and urgent revascularization; brain  
4 imaging for stroke; and labs and other appropriate testing for bleeding. In case of CRF-  
5 only narrative, the evidence will be considered insufficient and the case will not undergo  
6 CEC adjudication.  
7  
8  
9

## 10 11 12 **7. Quality control of the adjudication process**

13 To ensure the highest reproducibility, a random sample of  $\approx 5\%$  of adjudicated  
14 events will be re-reviewed by the complete CEC committee (ie 3 member) who are  
15 blinded to the initial results.  
16  
17

18 A major disagreement will be considered if there was a disagreement on whether  
19 an event had occurred or not while a minor disagreement is any discordance on the  
20 remaining adjudicated fields. Major disagreement will be reported as part of the final  
21 study report and will be used to identify the presence of systematic problems in the  
22 adjudication process.  
23  
24  
25  
26  
27  
28  
29

## 30 **CEC Operations**

31 Within the selected study patients, all IR-events as well as additional potential  
32 events (triggers) identified through a systematic analysis of the eCRF form will be  
33 considered for CEC adjudication. Non-IR triggers will be assessed after all the relevant  
34 source documentation has been requested to and provided by the participating sites and  
35 will be identified using a comprehensive search strategy that consider key words logically  
36 related to the event. In general, key words with a clear relationship to the endpoint of  
37 interest (e.g. for MI: unstable angina or ischemic heart disease) will trigger a formal CEC  
38 review, whereas keywords with a potential relationship (e.g. for MI: asystole, cardiac  
39 tamponade, hypertensive crisis) will trigger a review by a physician (independent from  
40 the CEC members) (**Appendix**). In the latter case, the event will undergo formal CEC  
41 review only if the reviewing physician will suspect an event. To limit possible reporting  
42 bias toward the null hypothesis (i.e. querying for source documentation may stimulate a  
43 site to report previously unreported endpoints), only patients who have successfully  
44 completed the follow-up, data entry, and all query processes for the parent study will be  
45  
46  
47  
48  
49  
50  
51  
52  
53  
54  
55  
56  
57  
58  
59  
60

1  
2  
3 deemed eligible for the GLASSY study. For sites whose first language is not English, a  
4 mother tongue MD will be involved for source documentation translation.  
5  
6

7 The first approval for GLASSY occurred on April 18 2017 and the first  
8 adjudication has been performed on September,6, 2017.  
9  
10

### 11 12 13 **Statistical analyses and sample size considerations**

14 The co-primary efficacy endpoint will be firstly tested as non-inferiority followed by a  
15 superiority testing only if non-inferiority criteria will be met. As the experimental  
16 treatment is simpler than the control treatment, it may be useful in patients with low drug  
17 adherence and/or who become intolerant to aspirin. For this reason GLASSY adopted a  
18 non-inferiority design for one of the two co- primary endpoints. The co-primary safety  
19 endpoint will be tested with a superiority hypothesis only. Alpha error will be evenly split  
20 (2.5% each) between the two co-primary endpoints. Based on best available data at the  
21 time of study design, the expected rate of the co-primary efficacy composite endpoint of  
22 death, non-fatal MI, non-fatal stroke, or urgent TVR is 11% at 24 months in the control  
23 group. The expected rate of co-primary safety endpoint of type 3 or 5 BARC bleeding is  
24 5% at 24 months in the control group. For the co-primary efficacy endpoint non-  
25 inferiority will be declared if the upper limit of the 95% confidence interval for the  
26 experimental (i.e. ticagrelor monotherapy) versus conventional arm at 24 months is less  
27 than 1.22 on a risk ratio scale, corresponding to 2.2% absolute risk difference. A total of  
28 3,340 patients per group (6,680 patients) will yield 85% power to detect non-inferiority  
29 with a one-sided type I error (alpha) of 2.5%. The risk ratio will be calculated using the  
30 Mantel-Cox log-rank method.  
31  
32

33 If non-inferiority will be met, 3,593 patients per group (7,186 patients) will provide 80%  
34 power to assess the superiority for the co-primary efficacy endpoint at 24 months,  
35 assuming 20% relative risk reduction in the experimental arm and a two-sided alpha of  
36 2.5%. A total of 7,186 patients will provide more than 80% power to detect a relative risk  
37 reduction of 33% in the experimental arm at 2 years with respect to co-primary safety  
38 endpoint of BARC 3 or 5 bleeding, setting the two-sided alpha error at 2.5%. For each  
39 trigger, the CEC-adjudicated events will be used if the evidence is sufficient and the IR  
40 endpoint if the evidence is not sufficient (ie “best available” data).  
41  
42  
43  
44  
45  
46  
47  
48  
49  
50  
51  
52  
53  
54  
55  
56  
57  
58  
59  
60



## Representativeness of the selected study cohort

There is no a priori attempt to select a patient population in GLASSY that could be entirely representative of the whole population included in the parent study. This would require random selection of the sample at the patient level or at least at the site level which, although ideally desirable, would be financially unsustainable for an investigator-initiated study.

Importantly, in GLOBAL LEADERS the randomization was stratified by site. This means that GLASSY is a randomized substudy of the parent study and therefore the estimation of treatment effects are expected to be valid.

Baseline characteristics, quality indicators and risk profile of GLOBAL LEADERS patients according to GLASSY inclusion are presented in Table 1 and 2, with no significant interactions on any of the variables considered.

The estimated minimum sample size was 7,186. Therefore, to minimize the number of participating sites, only those with the highest recruitment rate based on the final number of included subjects were included. Accordingly, the top 19 recruiting sites would have provided an overall of 7,365 patients. These 19 top ranking recruitment sites were invited in Q1 2017 and all agreed to participate.

Local and, where deemed necessary, central institutional review approval was sought for all 19 participating sites in the form of either a protocol addendum or site-specific amendment. In Q1 2018, due to delays in getting study approved for the Bulgarian site ranked at 19<sup>th</sup> position, the invitation to participate was extended to an additional site that was ranked at 20<sup>th</sup> position. This would allow reaching a final population of 7,601 patients.

## Evaluation of the concordance between IR- and CEC-adjudicated endpoints

Concordance between IR- and CEC-adjudicated endpoints will be assessed in events with sufficient evidence only. We will use the Cohen's kappa with exact binomial 95 percent confidence intervals as a measurement of the extent of agreement beyond chance alone. Cohen originally suggested the Kappa result be interpreted as follows: values  $\leq 0$  as indicating no agreement and 0.01–0.20 as none to slight, 0.21–0.40 as fair,



0.41– 0.60 as moderate, 0.61–0.80 as substantial, and 0.81–1.00 as almost perfect agreement. However, Cohen’s suggested interpretation was critiqued as too lenient for health-related studies because it implies that a score as low as 0.41 might be acceptable. Therefore, we will interpret concordance between IR- and CEC-endpoints as follows:<sup>11</sup>

|            |                |
|------------|----------------|
| 0–0.20     | None           |
| 0.21–0.39  | Minimal        |
| 0.40–0.59  | Weak           |
| 0.60–0.79  | Moderate       |
| 0.80–0.90  | Strong         |
| Above 0.90 | Almost Perfect |

## Ethics and Dissemination

GLASSY has been approved by local ethics committee of all study sites. A complete list is attached in the appendix. All patients enrolled signed a dedicated informed consent, in addition to that of the parent study explaining that their outcome data will be subjected to an independent review. The study has been registered on *ClinicalTrials.Gov* registration number:NCT01813435 (protocol version 1), a website that will be also used for reporting of study results and dissemination.

## Patient and Public Involvement

In GLASSY, the research question was developed to compliment the investigator-assessment. While patients were not directly involved in the design or conception of the study and no specific patient reported outcome has been considered, the extensive characterization of several non-fatal endpoints is expected to provide a thorough assessment of intervention on patient experience. GLASSY results will be disseminated to patients mainly via the local investigators. We especially take here the opportunity to thank all patients and families who volunteered to help others.

## Study organization

The European Cardiovascular Research Institute (ECRI-Trials B.V., PO Box 2125, 3000 CC Rotterdam, The Netherlands) will act as Sponsor of this substudy. The

1  
2  
3 leadership of the GLASSY is composed of the chair (Prof. Stephan Windecker) and  
4 principal investigator (Prof. Marco Valgimigli), in conjunction with the CEC members.  
5 Along with the executive committee of the parent study and one representative for each  
6 included GLASSY site they will form the publication committee.  
7  
8  
9

## 10 11 12 Discussion

13  
14 CECs are intended to enhance the scientific validity of a clinical trial through  
15 systematic, independent, and standardized identification, processing, and adjudication of  
16 suspected events. There are multiple lines of evidence indicating that central and  
17 independent adjudication of events may affect the results of a randomized trial by  
18 identifying clinically relevant unreported events,<sup>12-14</sup> by minimizing variability and  
19 heterogeneity inherently present when several different clinicians and data managers  
20 apply definitions of endpoints which are complex and sometimes not well known,<sup>15</sup> with  
21 implications on the interpretation of the effect of a randomized intervention.<sup>16</sup> Finally,  
22 there has been an increasing regulatory emphasis on the requirement of an independent  
23 CEC.<sup>17,18,19</sup>  
24  
25  
26  
27  
28  
29  
30

31 An analysis of the randomized PURSUIT trial documented that site investigator  
32 and CEC assessments of whether a MI had occurred disagreed in 983 (20%) of the 5,005  
33 patients with suspected MI, mostly reflecting site misclassification of post-enrolment MIs  
34 (as enrolment MIs) or underreported periprocedural MIs with a higher mortality  
35 associated with CEC-identified MIs as compared with patients with no MI.<sup>12</sup> Similarly in  
36 *post-hoc* analysis of two large randomized studies testing antithrombotic therapies in  
37 patients with coronary artery disease, CEC procedures identified more events (both  
38 ischemia and bleeding) as compared to site investigators.<sup>13,14</sup> Moreover, independent  
39 adjudication of ischemic and bleeding endpoints may provide important mechanistic  
40 information that may deepen understanding of the primary endpoint result of the study by  
41 better characterizing components of such endpoints including, but not limited to cause of  
42 death, sub-type of MI according to standardized definitions,<sup>20</sup> and bleeding location.  
43  
44  
45  
46  
47  
48  
49  
50  
51

52 Also standardized adjudication processes provide the basis for consistency and  
53 reproducibility. In large validation effort of all-comer stent trials, a harmonization  
54  
55  
56  
57  
58  
59  
60

1  
2  
3 process provided a high level of concordance for event adjudication and improved  
4 accuracy for final event reporting.<sup>15</sup>  
5

6  
7 Finally, the presence of a CEC has been not only strongly advocated by regulatory  
8 authorities,<sup>17</sup> but also requested in some instances for concern of bias in open label  
9 studies.<sup>18</sup> Notably, regulatory authorities have been recently involved directly in  
10 endpoint definition along with investigators, pharmaceutical and CV device  
11 manufacturers, and other stakeholders.<sup>19</sup>  
12  
13  
14

15 GLASSY is a first of its kind scientific study designed to implement CEC  
16 processes in the context of a large phase III pragmatic trial intended to collect only  
17 investigator-reported endpoints. As such, it may provide unique information on how the  
18 adoption of CEC processes may affect study results. Some design features of a RCT,  
19 including blinding of randomized treatment and independent endpoint adjudication, may  
20 be complex, costly, and challenging to implement in a pragmatic trial thus limiting study  
21 feasibility. On the other hand, these characteristics are important to enhance the scientific  
22 validity and quality of the evidence generated by minimizing detection and/or reporting  
23 bias. GLASSY may indirectly allow to assess whether such bias(es) are present in  
24 GLOBAL LEADERS by quantifying the concordance (or lack thereof) between IR- and  
25 CEC-adjudicated endpoints. In other words, to test the value of CECs. This could have  
26 relevant implications not only for the interpretation of the GLOBAL LEADERS results  
27 but also to inform the design of similar studies in the future.  
28  
29  
30  
31  
32  
33  
34  
35  
36  
37

38 Pragmatic clinical trials are fundamental to complement earlier phase studies  
39 designed to explore the efficacy of a given intervention. In addition, recent registry based  
40 randomized trials have been appraised owing to their ability to address clinically relevant  
41 questions, in large representative patient populations at limited cost. Pragmatism, an  
42 established concept in clinical research, aims at enhancing generalizability rather than  
43 internal validity of a study result and promote clinical or policy decision-making by  
44 providing evidence for the adoption of a given intervention into real-world clinical  
45 practice.<sup>21-23</sup> To quantify the pragmatism of a clinical trial, tools have been proposed to  
46 examine whether key dimensions of a study – such as eligibility, recruitment, and  
47 primary outcome – are directly related and relevant to usual care.<sup>24</sup> Importantly, the role  
48 of independent endpoint adjudication in this context is a quality rather than a pragmatic  
49  
50  
51  
52  
53  
54  
55  
56  
57  
58  
59  
60

1  
2  
3 issue. If the quality and consistency of endpoint ascertainment can be improved by  
4 adjudication without affecting routine patient care, CECs are highly desirable.<sup>25</sup>  
5

6  
7 A typical strength of CEC processes is to provide standardization around  
8 secondary outcomes or subtype of events, such as characterization of the modality of  
9 death, the location of a bleeding or the type of MI according to the Universal  
10 Classification, that may be not reliably collected in the absence of standardized  
11 definitions and conventions. These data however, are important to fully characterize the  
12 efficacy and safety of a antithrombotic treatment intervention, such as that studied in the  
13 GLOBAL LEDERS study. According to best adjudication practice, GLASSY will collect  
14 and analyze extensive outcome data, beyond the occurrence of the event itself, that were  
15 not considered in GLOBAL LEADERS CRF. Additionally, for each non-fatal suspected  
16 endpoint we will assess if the documentation provided by the site was sufficient to  
17 understand whether the endpoint has occurred or not that may allow indirectly estimating  
18 the quality of endpoint reporting by the site.  
19  
20  
21  
22  
23  
24  
25  
26  
27  
28  
29

### 30 **Limitations**

31 An intrinsic limitation of GLASSY is that GLOBAL LEADERS has been  
32 designed as an IR-only study. Therefore, systematic identification of study endpoints is  
33 limited by the eCRF and relies on source documentation provided by the site, which  
34 reduces the ability to identify all possible potential endpoints.  
35  
36  
37

38 In addition, GLASSY, for logistical reasons, will be conducted in a representative  
39 sample rather than the entire parent study. Although a random sample would have been  
40 ideal in this setting, this was neither feasible or financially sustainable. The practical  
41 reason to focus enrollment for GLASSY to top enrolling center may bias the study  
42 toward the null hypothesis of no difference between IR- and CEC-adjudicated endpoint  
43 by selecting best enrolling sites. While this bias is possible, the relatively large study  
44 sample ( $\approx 50\%$  of the parent study) makes this possibility unlikely.  
45  
46  
47  
48  
49  
50  
51

### 52 **Conclusions**

53  
54  
55  
56  
57  
58  
59  
60

GLASSY will assess the scientific implications of CEC adjudication processes within a large RCT designed to collect only IR-reported events, to extend the assessment of the effectiveness and safety of the randomized intervention tested in GLOBAL LEADERS to a broad range of non-fatal ischemic and bleeding endpoints, and ultimately test the value of standardized CEC processes within a pragmatic study design.

## Contributor ship

Marco Valgimigli, Stephan Windecker, Sergio Leonardi, Anna Franzone, Eugene McFadden: study design, manuscript drafting, data interpretation and critical revision.

Eugene McFadden, Sergio Leonardi, Anna Franzone, Raffaele Piccolo: Clinical Event Committee operations and adjudications.

Anna Franzone: data management

Dierik Heg, Peter Juni: statistical analysis, data interpretation and critical revision.

Pascal Vranckx, Patrick W. Serruys, Edouard Benit, Christoph Liebetrau, Luc Janssens, Maurizio Ferrario, Aleksander Zurakowski, Robert Jan van Geuns, Marcello Dominici, Kurt Huber, Ton Slagboom, Paweł Buszman, Leonardo Bolognese, Carlo Tumscitz, Krzysztof Bryniarski, Adel Aminian, Mathias Vrolix, Ivo Petrov, Scot Garg, Christoph Naber, Janusz Prokopczuk, Christian Hamm, Gabriel Steg: data acquisition, interpretation and critical revision

## Competing Interest

SL reports personal fees for advisory board participation from AstraZeneca, Chiesi, The Medicine Company. Dr Valgimigli reports grants from The Medicines Company, grants from Terumo, during the study; grants from AstraZeneca, and personal fees from Terumo, St Jude Vascular, and Abbott Vascular, outside the submitted work.

## Funding

The study is independently financed by resources of a professorship grant at the University of Bern, Switzerland. No extramural funding was used to support this

manuscript. The authors are solely responsible for the drafting and editing of the paper and its final contents.

## References

1. Valgimigli M, Bueno H, Byrne RA, et al. 2017 ESC focused update on dual antiplatelet therapy in coronary artery disease developed in collaboration with EACTS: The Task Force for dual antiplatelet therapy in coronary artery disease of the European Society of Cardiology (ESC) and of the European Association for Cardio-Thoracic Surgery (EACTS). *Eur Heart J* 2017. [Epub ahead of print]
2. J.A. Jakubowski, N. Matsushima, F. Asai, et al. A multiple dose study of prasugrel (CS-747), a novel thienopyridine P2Y<sub>12</sub> inhibitor, compared with clopidogrel in healthy humans. *Br J Clin Pharmacol*, 63 (2007), pp. 421-430
3. Siller-Matula JM, Trenk D, Schrör K, Gawaz M, Kristensen SD, Storey RF, Huber K; EPA (European Platelet Academy). Response variability to P2Y<sub>12</sub> receptor inhibitors: expectations and reality. *JACC Cardiovasc Interv*. 2013 Nov;6(11):1111-28.
4. Wallentin L, Becker RC, Budaj A, Cannon CP, Emanuelsson H, Held C, Horrow J, Husted S, James S, Katus H, Mahaffey KW, Scirica BM, Skene A, Steg PG, Storey RF, Harrington RA; PLATO Investigators, Freij A, Thorsén M. Ticagrelor versus clopidogrel in patients with acute coronary syndromes. *N Engl J Med* 2009;361(11):1045-57.
5. Armstrong PC, Leadbeater PD, Chan MV, Kirkby NS, Jakubowski JA, Mitchell JA, Warner TD. In the presence of strong P2Y<sub>12</sub> receptor blockade, aspirin provides little additional inhibition of platelet aggregation. *J Thromb Haemost*. 2011;9:552-61.
6. Gargiulo G, Windecker S, Vranckx P, Gibson CM, Mehran R, Valgimigli M. A Critical Appraisal of Aspirin in Secondary Prevention: Is Less More? *Circulation*. 2016 Dec 6;134(23):1881-1906.
7. Vranckx P, Valgimigli M, Windecker S, Steg PG, Hamm C, Juni P, Garcia-Garcia HM, van Es GA, Serruys PW. Long-term ticagrelor monotherapy versus standard dual antiplatelet therapy followed by aspirin monotherapy in patients undergoing biolimus-eluting stent implantation: rationale and design of the GLOBAL LEADERS trial. *EuroIntervention* 2016 Nov 20;12(10):1239-1245.
8. Seltzer JH, Turner JR, Geiger MJ, et al. Centralized adjudication of cardiovascular end points in cardiovascular and noncardiovascular pharmacologic trials: a report from the Cardiac Safety Research Consortium. *Am Heart J*. 2015;169(2):197-204.

- 1  
2  
3 9. Hansson L, Hedner T, Dahlöf B. Prospective randomized open blinded end-point  
4 (PROBE) study. A novel design for intervention trials. Prospective Randomized  
5 Open Blinded End-Point. *Blood Press* 1992;1:113–9.
- 6  
7  
8 10. Kahan BC, Cro S, Dore CJ, et al. Reducing bias in open-label trials where blinded  
9 outcome assessment is not feasible: strategies from two randomised trials. *Trials*.  
10 2014;15:456.
- 11  
12 11. McHugh ML. Interrater reliability: the kappa statistic. *Biochem Med (Zagreb)*.  
13 2012;22(3):276-282.
- 14  
15 12. Mahaffey KW, Harrington RA, Akkerhuis M, et al. Disagreements between  
16 central clinical events committee and site investigator assessments of myocardial  
17 infarction endpoints in an international clinical trial: review of the PURSUIT  
18 study. *Current Controlled Trials in Cardiovascular Medicine*. 2001;2(4):187-194.  
19 doi:10.1186/cvm-2-4-187.
- 20  
21 13. Jatene T, Harrington RA, Stone GW, Steg PG, Gibson CM, Hamm CW, Price MJ,  
22 Prats J, Deliargyris EN, Mahaffey KW, White HD, Bhatt DL; CHAMPION  
23 PHOENIX Investigators. Investigator-Reported Bleeding Versus Post Hoc  
24 Adjudication of Bleeding: Lessons From the CHAMPION PHOENIX Trial. *J Am*  
25 *Coll Cardiol*. 2016 Feb 9;67(5):596-8.
- 26  
27 14. Mahaffey KW, Held C, Wojdyla DM, James SK, Katus HA, Husted S, Steg PG,  
28 Cannon CP, Becker RC, Storey RF, Khurmi NS, Nicolau JC, Yu CM, Ardissino  
29 D, Budaj A, Morais J, Montgomery D, Himmelmann A, Harrington RA,  
30 Wallentin L; PLATO Investigators. Ticagrelor effects on myocardial infarction  
31 and the impact of event adjudication in the PLATO (Platelet Inhibition and  
32 Patient Outcomes) trial. *J Am Coll Cardiol*. 2014 Apr 22;63(15):1493-9.
- 33  
34 15. Vranckx P, McFadden E, Cutlip DE, Mehran R, Swart M, Kint PP, Zijlstra F,  
35 Silber S, Windecker S, Serruys PW. Clinical endpoint adjudication in a  
36 contemporary all-comers coronary stent investigation: methodology and external  
37 validation. *Contemp Clin Trials* 2013 Jan;34(1):53-9.
- 38  
39 16. Leonardi S, Lopes RD, Steg PG, Abnoui F, Menozzi A, Prats J, Mangum S,  
40 Wilson M, Todd M, Stone GW, Gibson CM, Hamm CW, Price MJ, White HD,  
41 Harrington RA, Bhatt DL, Mahaffey KW. Implications of different criteria for  
42 percutaneous coronary intervention-related myocardial infarction on study results  
43 of three large phase III clinical trials: The CHAMPION experience. *Eur Heart J*  
44 *Acute Cardiovasc Care* 2016. pii: 2048872616661692.
- 45  
46 17. Farb A, Zuckerman BD. Clinical event adjudication in cardiovascular device  
47 trials: An Food and Drug Administration perspective. *Am Heart J* 2017  
48 Sep;191:62-64.
- 49  
50  
51  
52  
53  
54  
55  
56  
57  
58  
59  
60



18. Lopes RD, Dickerson S, Hafley G, Burns S, Tourt-Uhlig S, White J, Newby LK, Komajda M, McMurray J, Bigelow R, Home PD, Mahaffey KW. Methodology of a reevaluation of cardiovascular outcomes in the RECORD trial: study design and conduct. *Am Heart J*. 2013 Aug;166(2):208-216.e28.
19. Hicks KA, Mahaffey KW, Mehran R, Nissen SE, Wiviott SD, Dunn B, Solomon SD, Marler JR, Teerlink JR, Farb A, Morrow DA, Targum SL, Sila CA, Thanh Hai MT, Jaff MR, Joffe HV, Cutlip DE, Desai AS, Lewis EF, Gibson CM, Landray MJ, Lincoff AM, White CJ, Brooks SS, Rosenfield K, Domanski MJ, Lansky AJ, McMurray JJV, Tcheng JE, Steinhubl SR, Burton P, Mauri L, O'Connor CM, Pfeffer MA, Hung HMJ, Stockbridge NL, Chaitman BR, Temple RJ; Standardized Data Collection for Cardiovascular Trials Initiative (SCTI). 2017 Cardiovascular and Stroke Endpoint Definitions for Clinical Trials. *J Am Coll Cardiol*. 2018 Mar 6;71(9):1021-1034.
20. Leonardi S, Truffa AA, Neely ML, Tricoci P, White HD, Gibson CM, Wilson M, Stone GW, Harrington RA, Bhatt DL, Mahaffey KW. A novel approach to systematically implement the universal definition of myocardial infarction: insights from the CHAMPION PLATFORM trial. *Heart* 2013 Sep;99(17):1282-7.
21. Sacristán JA, Dilla T. Generalizability in Pragmatic Trials. *JAMA* 2017; 317(1):87-88.
22. Fröbert O, Lagerqvist B, Olivecrona GK, Omerovic E, Gudnason T, Maeng M, Aasa M, Angerås O, Calais F, Danielewicz M, Erlinge D, Hellsten L, Jensen U, Johansson AC, Kåregren A, Nilsson J, Robertson L, Sandhall L, Sjögren I, Ostlund O, Harnek J, James SK; TASTE Trial. Thrombus aspiration during ST-segment elevation myocardial infarction. *N Engl J Med* 2013;369(17):1587-97.
23. Lauer MS, D'Agostino RB Sr. The randomized registry trial--the next disruptive technology in clinical research? *N Engl J Med*. 2013 Oct 24;369(17):1579-81.
24. Loudon K, Treweek S, Sullivan F, Donnan P, Thorpe KE, Zwarenstein M. The PRECIS-2 tool: designing trials that are fit for purpose. *BMJ* 2015;350:h2147
25. Ford I, Norrie J. Pragmatic Trials. *N Engl J Med*. 2016 Aug 4;375(5):454-63.



## Tables

**Table 1. Baseline characteristics of GLOBAL LEADERS patients according to GLASSY inclusion**

|                                             | GLASSY<br>(20 sites)<br>N = 7585 | NO GLASSY<br>(110 sites)<br>N = 8383 | p<br>Value |
|---------------------------------------------|----------------------------------|--------------------------------------|------------|
| Age (years)                                 | n = 7585, 64.9 ±<br>10.3         | n = 8383, 64.2 ±<br>10.3             | 0,41       |
| Female                                      | n = 7585, 1799<br>(23.7%)        | n = 8383, 1915<br>(22.8%)            | 0,33       |
| Hypertension                                | n = 7565, 5492<br>(72.6%)        | n = 8349, 6223<br>(74.5%)            | 0,70       |
| Diabetes mellitus                           | n = 7584, 1822<br>(24.0%)        | n = 8373, 2216<br>(26.5%)            | 0,47       |
| Renal failure (<60 eGFR)                    | n = 7567, 1005<br>(13.3%)        | n = 8316, 1166<br>(14.0%)            | 0,83       |
| Peripheral vascular disease                 | n = 7550, 553<br>(7.3%)          | n = 8272, 452<br>(5.5%)              | 0,030      |
| Current smoker                              | n = 7585, 2186<br>(28.8%)        | n = 8383, 1983<br>(23.7%)            | 0,007      |
| Previous myocardial infarction              | n = 7575, 1762<br>(23.3%)        | n = 8347, 1948<br>(23.3%)            | 0,91       |
| Previous percutaneous coronary intervention | n = 7581, 2522<br>(33.3%)        | n = 8373, 2699<br>(32.2%)            | 0,53       |
| Previous coronary artery bypass grafting    | n = 7581, 443<br>(5.8%)          | n = 8374, 500<br>(6.0%)              | 0,62       |
| Stable CAD                                  | n = 7585, 3745<br>(49.4%)        | n = 8383, 4736<br>(56.5%)            | 0,048      |
| Multivessel treatment                       | n = 7585, 1098                   | n = 8383, 1248                       | 0,65       |

|                                                       |                     |                     |      |
|-------------------------------------------------------|---------------------|---------------------|------|
|                                                       | (14.5%)             | (14.9%)             |      |
| Previous major bleeding or predisposition to bleeding | n = 7572, 48 (0.6%) | n = 8375, 50 (0.6%) | 0,78 |

Mixed-models p-values, accounting for a random effect of hospital identifier.

**Table 2. Quality indicators and risk profile of GLOBAL LEADERS patients according to GLASSY inclusion**

|                                                                    | GLASSY               | NO GLASSY            | p-value | interaction p-value |
|--------------------------------------------------------------------|----------------------|----------------------|---------|---------------------|
| Nr of patients                                                     | N = 7585             | N = 8383             |         |                     |
| All-cause mortality or New Q-wave MI or equivalent LBBB at 2 years | n = 7585, 328 (4.3%) | n = 8383, 325 (3.9%) | 0,16    | 0,77                |
| All-cause mortality at 2 years                                     | n = 7585, 247 (3.3%) | n = 8383, 230 (2.7%) | 0,06    | 0,34                |
| New Q-wave MI or equivalent LBBB at 2 years                        | n = 7585, 89 (1.2%)  | n = 8383, 97 (1.2%)  | 0,93    | 0,34                |
| BARC 3 or 5 Bleeding at 2 years                                    | n = 7585, 168 (2.2%) | n = 8383, 164 (2.0%) | 0,26    | 0,90                |

|    |                                                                                                         |                             |                              |        |      |
|----|---------------------------------------------------------------------------------------------------------|-----------------------------|------------------------------|--------|------|
| 1  |                                                                                                         |                             |                              |        |      |
| 2  |                                                                                                         |                             |                              |        |      |
| 3  |                                                                                                         |                             |                              |        |      |
| 4  |                                                                                                         |                             |                              |        |      |
| 5  | BARC 1 Bleeding at 2 years                                                                              | n = 7585,<br>657 (8.7%)     | n = 8383,<br>662 (7.9%)      | 0,08   | 0,59 |
| 6  |                                                                                                         |                             |                              |        |      |
| 7  |                                                                                                         |                             |                              |        |      |
| 8  |                                                                                                         |                             |                              |        |      |
| 9  | Primary endpoint complete?                                                                              | n = 7585,                   | n = 8383,                    | <0.001 | 0,75 |
| 10 |                                                                                                         |                             |                              |        |      |
| 11 |                                                                                                         |                             |                              |        |      |
| 12 | complete                                                                                                | 7152 (94.3%)                | 7683 (91.6%)                 |        |      |
| 13 |                                                                                                         |                             |                              |        |      |
| 14 |                                                                                                         |                             |                              |        |      |
| 15 |                                                                                                         |                             |                              |        |      |
| 16 | vital status unknown                                                                                    | 0 (0.0%)                    | 8 (0.1%)                     |        |      |
| 17 |                                                                                                         |                             |                              |        |      |
| 18 |                                                                                                         |                             |                              |        |      |
| 19 | patient died post-2yrs & ECG information<br>unavailable                                                 | 11 (0.1%)                   | 16 (0.2%)                    |        |      |
| 20 |                                                                                                         |                             |                              |        |      |
| 21 |                                                                                                         |                             |                              |        |      |
| 22 |                                                                                                         |                             |                              |        |      |
| 23 |                                                                                                         |                             |                              |        |      |
| 24 | patient alive & ECG information unavailable                                                             | 422 (5.6%)                  | 676 (8.1%)                   |        |      |
| 25 |                                                                                                         |                             |                              |        |      |
| 26 |                                                                                                         |                             |                              |        |      |
| 27 |                                                                                                         |                             |                              |        |      |
| 28 |                                                                                                         |                             |                              |        |      |
| 29 |                                                                                                         |                             |                              |        |      |
| 30 | Nr of sites                                                                                             | N = 20 sites                | N = 110 sites                |        |      |
| 31 |                                                                                                         |                             |                              |        |      |
| 32 |                                                                                                         |                             |                              |        |      |
| 33 |                                                                                                         |                             |                              |        |      |
| 34 |                                                                                                         |                             |                              |        |      |
| 35 |                                                                                                         |                             |                              |        |      |
| 36 |                                                                                                         |                             |                              |        |      |
| 37 |                                                                                                         |                             |                              |        |      |
| 38 | Nr of protocol deviations/10 patients                                                                   | n = 20, 0.4<br>(0.1 to 0.8) | n = 110,<br>0.6 (0.2 to 1.3) | 0,14   |      |
| 39 |                                                                                                         |                             |                              |        |      |
| 40 |                                                                                                         |                             |                              |        |      |
| 41 |                                                                                                         |                             |                              |        |      |
| 42 |                                                                                                         |                             |                              |        |      |
| 43 | Statin at discharge                                                                                     | n = 7547,<br>6954 (92.1%)   | n = 8324,<br>7747 (93.1%)    | 0,78   |      |
| 44 |                                                                                                         |                             |                              |        |      |
| 45 |                                                                                                         |                             |                              |        |      |
| 46 |                                                                                                         |                             |                              |        |      |
| 47 |                                                                                                         |                             |                              |        |      |
| 48 | Heart failure or left ventricular ejection fraction $\leq$<br>40% treated and ACE or ARB at discharge   | n = 251,<br>207 (82.5%)     | n = 284,<br>232 (81.7%)      | 0,51   |      |
| 49 |                                                                                                         |                             |                              |        |      |
| 50 |                                                                                                         |                             |                              |        |      |
| 51 |                                                                                                         |                             |                              |        |      |
| 52 | Heart failure or left ventricular ejection fraction $\leq$<br>40% treated and betablockers at discharge | n = 157,<br>130 (82.8%)     | n = 221,<br>181 (81.9%)      | 0,88   |      |
| 53 |                                                                                                         |                             |                              |        |      |
| 54 |                                                                                                         |                             |                              |        |      |
| 55 |                                                                                                         |                             |                              |        |      |
| 56 |                                                                                                         |                             |                              |        |      |
| 57 |                                                                                                         |                             |                              |        |      |
| 58 |                                                                                                         |                             |                              |        |      |
| 59 |                                                                                                         |                             |                              |        |      |
| 60 |                                                                                                         |                             |                              |        |      |

1  
2  
3 GLASSY includes 20 sites, NO GLASSY includes 110 sites, total  
4 nr of sites was 130.  
5

6 p-values from Mantel-Cox logrank test, interaction p-value testing whether the GLASSY vs non-GLASSY sites modify  
7 the comparison Experimental treatment strategy vs Reference treatment strategy for the clinical outcomes. Protocol  
8 deviations compared with Mann-Whitney U-test.  
9

10 Protocol deviations included: inclusion/exclusion criteria, informed consent procedure,  
11 randomization procedure, study procedures, safety reporting.  
12  
13  
14  
15  
16  
17  
18  
19  
20  
21  
22

## 23 **Figures**

24  
25  
26  
27 **Figure 1. GLOBAL LEADERS Design.**  
28  
29

30  
31 **Figure 2. GLASSY Design**  
32  
33  
34  
35  
36  
37  
38  
39  
40  
41  
42  
43  
44  
45  
46  
47  
48  
49  
50  
51  
52  
53  
54  
55  
56  
57  
58  
59  
60

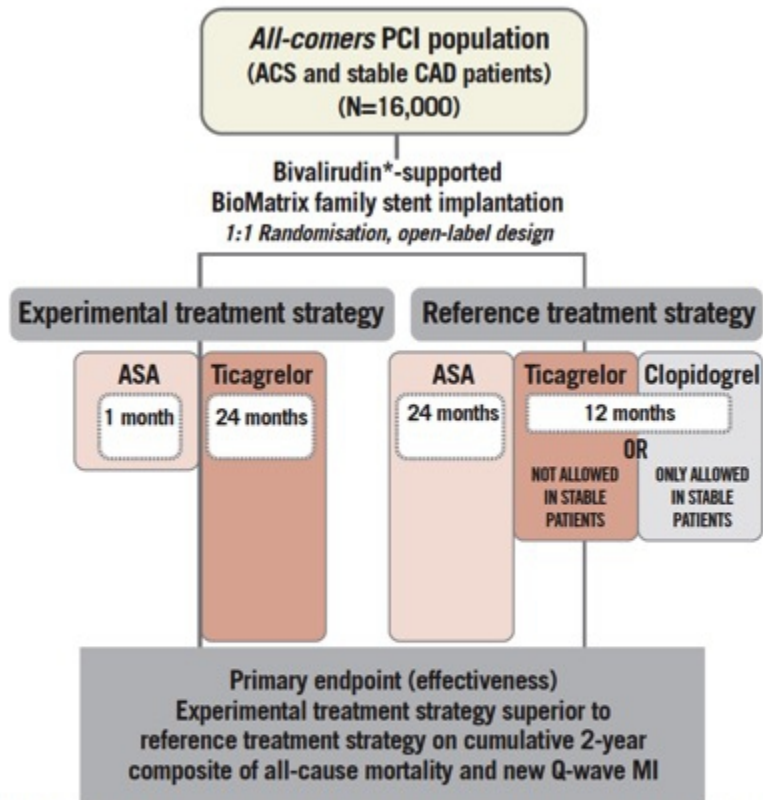

**IMPORTANT:** In the Reference treatment strategy arm, ticagrelor is not allowed in stable patients, and clopidogrel must be given in combination with ASA. However, patients already on stable maintenance treatment with ticagrelor (or prasugrel) can continue with ticagrelor treatment (for 12 months post index PCI).

\*In countries where available.

GLOBAL LEADERS design

33x40mm (300 x 300 DPI)

1  
2  
3  
4  
5  
6  
7  
8  
9  
10  
11  
12  
13  
14  
15  
16  
17  
18  
19  
20  
21  
22  
23  
24  
25  
26  
27  
28  
29  
30  
31  
32  
33  
34  
35  
36  
37  
38  
39  
40  
41  
42  
43  
44  
45  
46  
47  
48  
49  
50  
51  
52  
53  
54  
55  
56  
57  
58  
59  
60

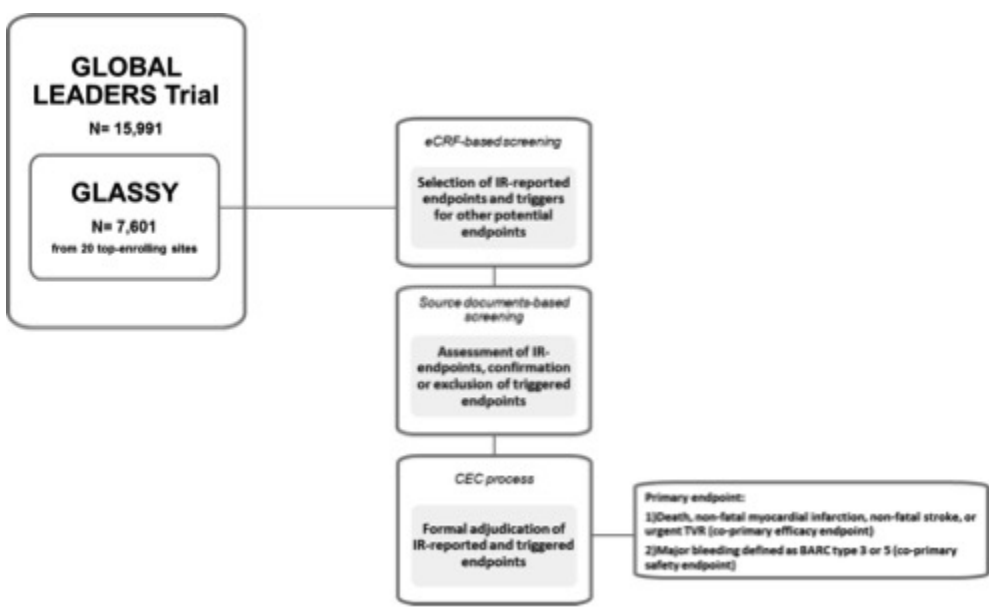

GLASSY Design

41x25mm (300 x 300 DPI)

## APPENDIX

### Clinical Events Committee

CEC project leader: Anna Franzone.

#### *Clinical Events Committee Composition*

Chair: Eugene Mc Fadden, Co-chair: Sergio Leonardi, Member: Raffaele Piccolo.

### Endpoints Definitions

#### **BLEEDING**

All potential bleeding events will be primarily adjudicated according to Bleeding Academic Research Consortium (BARC) classification as well as according to the TIMI and the GUSTO classification as follows:

Type 0: No bleeding

Type 1: Bleeding that is not actionable and does not cause the patient to seek unscheduled performance of studies, hospitalization, or treatment by a health care professional. May include episodes leading to self-discontinuation of medical therapy by the patient, without consulting a health care professional.

Type 2: Any overt, actionable sign of haemorrhage (e.g. more bleeding than would be expected for a clinical circumstance; including bleeding found by imaging alone) that does not fit the criteria for Types 3, 4, or 5 but does meet at least one of the following criteria:

Requiring non-surgical, medical intervention by a health care professional

Leading to hospitalization of increased level of care

Prompting evaluation

Type 3a:

- Overt bleeding plus haemoglobin drop of 3 to  $<5^{**}$  g/dL (provided haemoglobin drop is related to bleed)

- Any transfusion with overt bleeding

Type 3b:

- 1  
2  
3 - Overt bleeding plus haemoglobin drop  $\geq 5^{**}$  g/dL (provided haemoglobin drop is  
4 related to bleed)  
5  
6 - Cardiac tamponade  
7  
8 - Bleeding requiring surgical intervention for control (excluding dental / nasal / skin /  
9 haemorrhoid)  
10  
11 - Bleeding requiring intravenous vasoactive agents  
12

13 Type 3c:

- 14 - Intracranial haemorrhage (does not include microbleeds or haemorrhagic  
15 transformation; does include intraspinal)

16 Subcategories: confirmed by autopsy or imaging or LP

17 Intra-ocular bleed compromising vision

18 Type 4: CABG-related bleeding

- 19 - Perioperative intracranial bleeding within 48 hours  
20  
21 - Reoperation following closure of sternotomy for the purpose of controlling bleeding  
22  
23 - Transfusion of  $\geq 5$  units of whole blood or packed red blood cells within 48 hour  
24 period\*  
25  
26 - Chest tube output  $\geq 2$  L within a 24 hour period  
27  
28

29 Type 5a

- 30 - Probable fatal bleeding; no autopsy or imaging confirmation, but clinically  
31 suspicious  
32

33 Type 5b

- 34 - Definite fatal bleeding: overt bleeding or autopsy or imaging confirmation  
35  
36  
37

38  
39  
40  
41  
42  
43 Obs: Platelet transfusions should be recorded and reported, but are not included in  
44 these definitions until further information is obtained about the relationship to  
45 outcomes. \* Corrected for transfusion (1 U packed red blood cells or 1 U whole  
46 blood\_1g/dL haemoglobin). † Cell saver products will not be counted.  
47  
48  
49

50  
51 TIMI Bleeding Criteria

52 Non-CABG related bleeding

- 53  
54 • Major  
55  
56 o Any intracranial bleeding (excluding microhaemorrhages  $< 10$ mm evident  
57 only on gradient-echo MRI)  
58  
59  
60



- o Clinically overt signs of haemorrhage associated with a drop in haemoglobin of  $\geq 5$ g/dL
- o Fatal bleeding (bleeding that directly results in death within 7 days)
  - Minor
- o Clinically overt (including imaging), resulting in haemoglobin drop of 3 to  $< 5$ g/dL
  - Other non-major or minor
- o Any overt bleeding event that does not meet the criteria above

#### Bleeding in the setting of CABG

- Fatal bleeding (bleeding that directly results in death)
- Perioperative intracranial bleeding
- Reoperation after closure of the sternotomy incision for the purpose of controlling bleeding
- Transfusion of  $\geq 5$  U PRBCs or whole blood within a 48-h period; cell saver transfusion will not be counted in calculations of blood products.
- Chest tube output  $> 2$  L within a 24-h period

#### GUSTO Bleeding Criteria

##### Severe or life-threatening

- o Intracerebral haemorrhage
- o Resulting in substantial hemodynamic compromise requiring treatment

##### Moderate

- o Requiring blood transfusion but not resulting in hemodynamic compromise

##### Mild

- o Bleeding that does not meet above criteria

#### **DEATH**

All deaths will be categorized as cardiovascular, non-cardiovascular or undetermined based on the definitions below.

#### Cardiovascular death

Cardiovascular Death is defined as death resulting from an acute myocardial infarction,

1  
2  
3 sudden cardiac death, death due to heart failure, death due to stroke, death  
4 (immediate) due to cardiovascular (CV) procedures, death due to CV haemorrhage,  
5 and death due to other  
6 cardiovascular causes.  
7  
8  
9

10 Death due to Acute Myocardial Infarction:

11 • Death by any mechanism (arrhythmia, heart failure, mechanical complication,  
12 low output) within 30 days after a myocardial infarction (MI) related to the immediate  
13 consequences of the myocardial infarction, such as progressive congestive heart  
14 failure (CHF), inadequate cardiac output, or refractory arrhythmia. If these events  
15 occur after a “break” (e.g., a CHF and arrhythmia free period of at least a week), they  
16 should be designated by the immediate cause, even though the MI may have increased  
17 the risk of that event (e.g., late arrhythmic death becomes more likely after an acute  
18 myocardial infarction (AMI)). The acute myocardial infarction should be verified to  
19 the extent possible by the diagnostic criteria outlined for acute myocardial infarction  
20 or by autopsy findings showing recent myocardial infarction or recent coronary  
21 thrombus. Sudden cardiac death, if accompanied by symptoms suggestive of  
22 myocardial ischemia, new ST elevation, new LBBB, or evidence of fresh thrombus by  
23 coronary angiography and/or at autopsy should be considered death resulting from an  
24 acute myocardial infarction, even if death occurs before blood samples or 12-lead  
25 electrocardiogram (ECG) could be obtained, or at a time before the appearance of  
26 cardiac biomarkers in the blood. Death resulting from a procedure to treat a  
27 myocardial infarction percutaneous coronary intervention (PCI), coronary artery  
28 bypass graft surgery (CABG), or to treat a complication resulting from myocardial  
29 infarction, should also be considered death due to acute MI. Death resulting from an  
30 elective coronary procedure to treat myocardial ischemia (i.e. chronic stable angina)  
31 or death due to a MI that occurs as a direct consequence of a CV  
32 investigation/procedure/operation should be considered as a death due to a CV  
33 procedure.  
34  
35  
36  
37  
38  
39  
40  
41  
42  
43  
44  
45  
46  
47  
48  
49  
50

51 Sudden Cardiac Death:

- 52  
53 • Death that occurs unexpectedly, not following an acute AMI, and includes the  
54 following deaths:  
55  
56 o Death witnessed and occurring without new or worsening symptoms.  
57  
58  
59  
60

1  
2  
3 o Death witnessed within 60 minutes of the onset of new or worsening cardiac  
4 symptoms, unless documented (i.e. by ECG or other objective) to be due to acute  
5 myocardial infarction.  
6  
7

8 Death witnessed and attributed to an identified arrhythmia (e.g., captured on an  
9 electrocardiographic (ECG) recording, witnessed on a monitor, or unwitnessed but  
10 found on implantable cardioverter-defibrillator review). Death after unsuccessful  
11 resuscitation from cardiac arrest.  
12  
13

14 o Death after successful resuscitation from cardiac arrest and without  
15 identification of a non-cardiac aetiology.  
16  
17

18 o Unwitnessed death without other cause of death (information regarding the  
19 patient's clinical status preceding death should be provided, if available).  
20  
21

22 General Considerations: A subject seen alive and clinically stable 24 hours prior to  
23 being found dead without any evidence or information of a specific cause of death  
24 should be classified as "sudden cardiac death." Typical scenarios include:  
25  
26

- 27 - Subject well the previous day but found dead in bed the next day.
- 28 - Subject found dead at home on the couch with the television on.
- 29 - Deaths for which there is no information beyond "Patient found dead at home"  
30 may be classified as "death due to other cardiovascular causes".  
31  
32

33 Death due to Heart Failure or Cardiogenic Shock:  
34  
35

- 36 • Death due to Congestive Heart Failure refers to a death in association with  
37 clinically worsening symptoms and/or signs of heart failure not following an acute MI  
38 (see section \*\*\*). Deaths due to heart failure can have various etiologies, including  
39 single or recurrent myocardial infarctions, ischemic or non-ischemic cardiomyopathy,  
40 hypertension, or valvular disease. Cardiogenic shock not occurring in the context of  
41 an acute myocardial infarction or as the consequence of an arrhythmia occurring in  
42 the absence of worsening heart failure is defined as systolic blood pressure (SBP) <  
43 90 mm Hg for greater than 1 hour, not responsive to fluid resuscitation and/or heart  
44 rate correction, and felt to be secondary to cardiac dysfunction and associated with at  
45 least one of the following signs of hypoperfusion:-  
46  
47

- 48 o Cool, clammy skin or
- 49 o Oliguria (urine output < 30 mL/hour) or
- 50 o Altered sensorium or
- 51 o Cardiac index < 2.2 L/min/m<sup>2</sup>  
52  
53  
54  
55  
56  
57  
58  
59  
60

1  
2  
3 o Cardiogenic shock can also be defined if SBP < 90 mm Hg and increases to ≥  
4 90 mm Hg in less than 1 hour with positive inotropic or vasopressor agents alone  
5 and/or with mechanical support.  
6  
7

8 Death due to Stroke refers to death after a stroke that is either a direct consequence of  
9 the  
10 stroke or a complication of the stroke. Acute stroke should be verified to the extent  
11 possible by the diagnostic criteria outlined for stroke.  
12  
13

14  
15 Death due to Cardiovascular procedures refers to death caused by the immediate  
16 complications of a cardiac procedure and excludes death resulting from procedures to  
17 treat an acute MI or the complications resulting from an acute MI.  
18  
19

20 Death due to Cardiovascular Haemorrhage refers to death related to haemorrhage  
21 such as a non-stroke intracranial haemorrhage, non-procedural or non-traumatic  
22 vascular rupture (e.g., aortic aneurysm), or haemorrhage causing cardiac tamponade.  
23  
24

25 Death due to Other Cardiovascular Causes: Death due to Other Cardiovascular Causes  
26 refers to a cardiovascular death not included in the above categories (e.g., pulmonary  
27 embolism or peripheral arterial disease).  
28  
29  
30

31  
32 Non-cardiovascular death:  
33

34 Non-cardiovascular death is defined as any death that is not thought to be due to a  
35 cardiovascular cause. The following categories may be collected  
36

- 37  
38 - Non-Malignant Causes  
39  
40 - Pulmonary  
41  
42 - Renal  
43  
44 - Gastrointestinal  
45  
46 - Hepatobiliary  
47  
48 - Pancreatic  
49  
50 - Infection (includes sepsis)  
51  
52 - Non-infectious (e.g., systemic inflammatory response syndrome (SIRS))  
53  
54 - Haemorrhage\*, excluding haemorrhagic strokes and bleeding in the setting of  
55 coronary revascularization  
56  
57 - Non-cardiovascular procedure or surgery  
58  
59 - Accidental (e.g., physical accidents or drug overdose) or trauma  
60  
61 - Suicide

- Prescription Drug Error (e.g., prescribed drug overdose, use of inappropriate drug, or drug drug
- interaction)
- Neurological process that is not a stroke or haemorrhage
- Other non-cardiovascular, specify: \_\_\_\_\_

\*Examples: Death due to GI bleeding is not considered a CV death. Death due to retroperitoneal haematoma following PCI is considered CV death. Death due to intracerebral haemorrhage is considered CV death.

#### Malignant Causes

Death results directly from the cancer;

OR

Death results from a complication of the cancer (e.g. infection, complication of surgery / chemotherapy / radiotherapy);

OR

Death results from withdrawal of other therapies because of concerns relating to the poor prognosis associated with the cancer

Cancer deaths may arise from cancers that were present prior to randomization or which developed subsequently should be further classified (worsening prior malignancy; new malignancy).

#### Undetermined cause of death:

Undetermined cause of death refers to a death not attributable to one of the above categories of cardiovascular death or to a non-cardiovascular cause, due to absence of any information (e.g., the only available information is “patient died”). The use of this category of death is discouraged and should apply to a minimal number of cases when no information at all on the circumstances of death are available (i.e. found on obituary of local newspaper). In all circumstances the reviewer will use all available information to attribute to one of the categories based on best clinical judgment.

1  
2  
3 For each death event an assessment will be made as to whether the event was caused,  
4 on the basis of the totality of the evidence, by a bleeding (ie a fatal bleeding  
5 occurred) or not.  
6  
7  
8  
9

## 10 MYOCARDIAL INFARCTION

11 For the primary analysis, MI endpoint will be defined based on the third universal  
12 definition of myocardial infarction with the exception of peri-procedural MI after  
13 PCI, which will be defined according to the SCAI definition. 34,35  
14

15 For secondary analyses, PCI-related MI according to the Third Universal MI  
16 definition (type 4a) will be also adjudicated.  
17  
18  
19  
20  
21

### 22 1. Spontaneous MI (>48 hours after intervention, MI type 1)

23 Symptoms suggestive of ischemia/infarction in association with ECG, cardiac  
24 biomarker or pathologic evidence of infarction as follows:<sup>34</sup>  
25

- 26 • Detection of a rise and/or fall of cardiac biomarker values (preferably cardiac  
27 troponin T or I) with at least one value above the 99th percentile upper reference limit  
28 and with at least one of the following:  
29 • Symptoms of ischemia  
30 • New or presumed new significant ST segment-T wave (ST-T) changes or new  
31 LBBB.  
32 • Development of new Q waves in the ECG

33 Evidence of new loss of viable myocardium or new regional wall motion abnormality

- 34 • Identification of an intracoronary thrombus by angiography or autopsy

35 Spontaneous MI typically occurs after the periprocedural period and may be  
36 secondary to late stent complications or progression of native disease (e.g., non-  
37 culprit lesion plaque rupture). Performance of ECG and angiography supports  
38 adjudication to either a target or non-target vessel or lesion in most cases.  
39

### 40 Type 2 MI

41 In instances of myocardial injury with necrosis where a condition other than CAD  
42 contributes to an imbalance between myocardial oxygen supply and/or demand, e.g.  
43 coronary endothelial dysfunction, coronary artery spasm, coronary embolism,  
44 tachy/bradyarrhythmias, anemia, respiratory failure, hypotension, and hypertension  
45 with or without LVH.  
46  
47  
48  
49  
50  
51  
52  
53  
54  
55  
56  
57  
58  
59  
60

1  
2  
3 *The distinction between type 1 and type 2 MI will be based by consensus on the*  
4 *preponderance of clinical evidence. The diagnosis of type 2 MI requires a*  
5 *predisposing condition as well as an acute Trigger of supply/demand imbalance,*  
6 *including acute anemia, respiratory failure, hypotension, sustained hypertension*  
7 *(with or without left ventricular hypertrophy), prolonged tachy- and brady-*  
8 *arrhythmias, coronary embolism, coronary artery spasm. If the evidence is conflicting*  
9 *or unclear, the MI will be classified as type 1.*  
10  
11  
12  
13  
14  
15  
16  
17  
18

### 19 Type 3 MI

20 Cardiac death with symptoms suggestive of myocardial ischaemia and presumed new  
21 ischaemic ECG changes or new LBBB, but death occurred before cardiac biomarkers  
22 were obtained, or before cardiac biomarker values would be increased.  
23  
24

25 Type 4a MI (NOT USED for primary analysis; see definition below)  
26  
27  
28

29 Type 4 MI is defined by elevation of cTn values ( $>5 \times \text{URL}$ ) occurring within 48h of  
30 the procedure in patients with normal baseline values ( $\leq \text{URL}$ ) or a rise of cTn values  
31  $>20\%$  if the baseline values are elevated and are stable or falling.  
32  
33

34 In addition, at least one of the following is required:

- 35 o symptoms suggestive of myocardial ischaemia
- 36 o new ischaemic ECG changes
- 37 o angiographic findings consistent with a procedural complication
- 38 o imaging demonstration of new loss of viable myocardium or new regional  
39 wall motion  
40 abnormality  
41  
42  
43  
44  
45  
46  
47

### 48 Type 4b MI

49 Stent thrombosis associated with MI when detected by coronary angiography or  
50 autopsy  
51 in the setting of evidence of myocardial ischaemia and with a rise and/or fall of  
52 cardiac  
53 biomarker values with at least one value above the URL.  
54  
55  
56  
57  
58  
59

### 60 Type 4c MI

1  
2  
3 A spontaneous MI where a restenosis is the only angiographic explanation  
4  
5

6 Type 5 MI

7  
8 Coronary artery bypass grafting (CABG) related MI is defined by elevation of  
9 troponin  
10 values ( $>10 \times$  URL) occurring within 48h of the procedure in patients with normal  
11 baseline  
12 cTn values ( $\leq$ URL).  
13  
14  
15  
16  
17

18 In addition, at least one of the following is required:

- 19  
20  
21 o new pathological Q waves or new LBBB  
22 o angiographic documented new graft or new native coronary artery occlusion  
23 o imaging evidence of new loss of viable myocardium or new regional wall  
24 motion  
25 abnormality.  
26  
27  
28  
29

30 2. Periprocedural MI after PCI (within 48 hours after PCI)

31 Periprocedural MI is defined based on the SCAI definitions as follows:

- 32  
33 1) In patients with normal baseline CK-MB: The peak CK-MB measured within  
34 48 hours of the procedure rises to  $\geq 10 \times$  the local laboratory ULN, or to  $\geq 5 \times$  ULN with  
35 new pathologic Q-waves in  $\geq 2$  contiguous leads or new persistent LBBB, OR in the  
36 absence of CK-MB measurements and a normal baseline cTn, a cTn (I or T) level  
37 measured within 48 hours of the PCI rises to  $\geq 70 \times$  the local laboratory ULN, or  $\geq 35 \times$   
38 ULN with new pathologic Q-waves in  $\geq 2$  contiguous leads or new persistent LBBB. .  
39  
40 2) In patients with elevated baseline CK-MB (or cTn) in whom the biomarker  
41 levels are stable or falling: The CK-MB (or cTn) rises by an absolute increment equal  
42 to those levels recommended above from the most recent pre-procedure level.  
43  
44 3) In patients with elevated CK-MB (or cTn) in whom the biomarker levels have  
45 not been shown to be stable or falling: The CK-MB (or cTn) rises by an absolute  
46 increment equal to those levels recommended above plus new ST-segment elevation  
47 or depression plus signs consistent with a clinically relevant MI, such as new onset or  
48 worsening heart failure or sustained hypotension.  
49  
50  
51  
52  
53  
54  
55  
56  
57  
58  
59  
60

## STENT THROMBOSIS



1  
2  
3 Stent Thrombosis is defined by the Academic Research Consortium as follows:  
4  
5

6  
7 Definite stent thrombosis is considered to have occurred by either angiographic or  
8  
9 pathological confirmation:

10 a. Angiographic confirmation of stent thrombosis†

11 The presence of a thrombus‡ that originates in the stent or in the segment 5 mm  
12 proximal or distal to the stent and presence of at least 1 of the following criteria  
13 within a 48-hour time window:  
14  
15

- 16 • Acute onset of ischemic symptoms at rest
- 17 • New ischemic ECG changes that suggest acute ischemia
- 18 • Typical rise and fall in cardiac biomarkers (refer to definition of spontaneous  
19 MI: Troponin or CK-MB > 99th percentile of URL)
- 20 • Nonocclusive thrombus. Intracoronary thrombus is defined as a (spheric,  
21 ovoid, or irregular) noncalcified filling defect or lucency surrounded by contrast  
22 material (on 3 sides or within a coronary stenosis) seen in multiple projections, or  
23 persistence of contrast material within the lumen, or a visible embolisation of  
24 intraluminal material downstream
- 25 • Occlusive thrombus TIMI 0 or TIMI 1 intrastent or proximal to a stent up to  
26 the most adjacent proximal side branch or main branch (if originates from the side  
27 branch)  
28  
29  
30  
31  
32  
33  
34  
35  
36  
37  
38  
39

40 b. Pathological confirmation of stent thrombosis

41 Evidence of recent thrombus within the stent determined at autopsy or via  
42 examination of tissue retrieved following thrombectomy  
43  
44  
45

46 †The incidental angiographic documentation of stent occlusion in the absence of  
47 clinical signs or symptoms is not considered a confirmed stent thrombosis (silent  
48 occlusion)  
49

50 ‡Intracoronary thrombus  
51  
52  
53

54 Probable stent thrombosis:

55 Clinical definition of probable stent thrombosis is considered to have occurred after  
56 intracoronary stenting in the following cases:  
57  
58

- 59 • Any unexplained death within the first 30 days.  
60

- 1  
2  
3 • Irrespective of the time after the index procedure, any myocardial infarction  
4 (MI) which is related to documented acute ischemia in the territory of the implanted  
5 stent without angiographic confirmation of stent thrombosis and in the absence of any  
6 other obvious cause.  
7  
8  
9

10  
11 Possible stent thrombosis:

12 Clinical definition of possible stent thrombosis is considered to have occurred with  
13 any unexplained death from 30 days following intracoronary stenting until end of trial  
14 follow up.  
15  
16  
17  
18

## 19 20 **STROKE**

21 Stroke is defined as an acute episode of focal or global neurological dysfunction  
22 caused by  
23 central nervous system (CNS) vascular injury as a result of hemorrhage or infarction.  
24 CNS includes brain, spinal cord and retina.  
25  
26  
27

28 Classification:

### 29 30 Ischemic Stroke

31 Ischaemic stroke is defined as an acute episode of focal cerebral, spinal, or retinal  
32 dysfunction caused by CNS infarction. Evidence of infarction is defined as  
33 "Pathological, imaging, or other objective evidence of acute cerebral, spinal cord, or  
34 retinal focal ischemic injury in a defined vascular distribution; or in absence of the  
35 above (i.e. imaging or autopsy unavailable), clinical evidence of cerebral, spinal cord,  
36 or retinal focal ischemic injury is based on symptoms persisting  $\geq 24$  hours or until  
37 death, and other etiologies excluded.  
38  
39  
40  
41  
42  
43

44 Note, Haemorrhagic infarction, defined as a parenchymal hemorrhage after CNS  
45 infarction, is considered an ischaemic stroke  
46  
47

### 48 49 Cerebral Haemorrhage

50 Hemorrhages in the CNS are classified as stroke if they are non-traumatic, caused by  
51 a vascular event, and result in injury to the CNS. In contrast, traumatic hemorrhages  
52 will not be characterized as stroke. Subdural hematoma will not be classified as a  
53 stroke. The diagnoses included in this section are intracerebral hemorrhage (intra-  
54 parenchymal and intraventricular) and subarachnoid hemorrhage (both aneurysmal  
55 and non-aneurysmal).  
56  
57  
58  
59

60 Stroke caused by intracerebral haemorrhage

1  
2  
3 Rapidly developing clinical signs of neurological dysfunction (focal or global)  
4 attributable to a focal collection of blood within the brain parenchyma or ventricular  
5 system that is not caused by trauma.  
6  
7

8 Stroke caused by subarachnoid haemorrhage

9  
10 Rapidly developing signs of neurological dysfunction (focal or global) and/or  
11 headache because of bleeding into the subarachnoid space (the space between the  
12 arachnoid membrane and the pia mater of the brain or spinal cord), which is not  
13 caused by trauma.  
14  
15

16 Haemorrhages may be further classified according to location (example,  
17 supratentorial,  
18 subtentorial, etc.)  
19

20 Stroke not otherwise specified

21  
22 An episode of acute neurological dysfunction presumed to be caused by ischemia or  
23 haemorrhage, persisting  $\geq 24$  hours or until death, but without sufficient evidence to  
24 be  
25 classified as one of the above.  
26  
27  
28  
29  
30  
31  
32  
33

### 34 **URGENT TARGET VESSEL REVASCULARIZATION**

35  
36  
37 A urgent target vessel revascularization (TVR) is a urgent coronary revascularization  
38 in a target coronary vessel (ie a vessel treated during the index PCI). Urgent coronary  
39 revascularization is defined as follows:  
40  
41

42 One or more episodes of rest pain, presumed to be ischemic in origin, which results in  
43 either urgent repeat PCI or urgent CABG. In the absence of pain, new ST segment  
44 changes (a new ST segment shift  $> 0.05$  mV (0.5 mm) on a 12-lead ECG), indicative  
45 of ischemia, acute pulmonary oedema, ventricular arrhythmias, or hemodynamic  
46 instability presumed to be ischemic in origin, will constitute sufficient evidence of  
47 ischemia. To be considered urgent, the repeat PCI or CABG will be initiated within  
48 24 hours of the last episode of ischemia and not be identified as planned/staged. The  
49 episode of ischemia leading to urgent repeat PCI must occur following completion of  
50 the index PCI and guide wire removal. CABG initiated within 24 hours of PCI (index  
51 or repeat) due to an unsatisfactory result, even in the absence of documented  
52 ischemia, will also be considered a urgent coronary revascularization endpoint.  
53  
54  
55  
56  
57  
58  
59  
60

### Approval Details of GLASSY Ethics Committee

| Country     | Sites               | Central Ethic Committee                                | Protocol Number      | Approval Date              |
|-------------|---------------------|--------------------------------------------------------|----------------------|----------------------------|
| Austria     | 4301                | Ethikkommission der Stadt Wien                         | 13-064-0413          | 03-Jul-2017                |
| Belgium     | 3204-3202-3205-3203 | Comité d'Etique LS.P.P.C OM 008                        | A17/31_23/08         | 27-Sep-2017                |
| Germany     | 4902-4903           | Ethikkommission des Fachbereichs Medizin-Bfarm         | 78/13<br>4038963     | 21-Jun-2017<br>15-Aug-2017 |
| Netherlands | 3101-3104           | Medisch Etische Toetsings Commissie Erasmus MC         | NL-43637.678.13      | 31-May-2017                |
| Italy       | 3902-3905-3909-3903 | Comitato Etico Area Pavia<br>AIFA                      | 20170018252<br>88004 | 03-Jul-2017<br>30-Jul-2018 |
| UK          | 4404                | North-West Liverpool Central Research Ethics Committee | 13/NW/0283           | 26-Jun-2017                |
| Switzerland | 4106                | Kantonale Ethikkommission Bern                         | 039/13               | 18-Apr-2017                |
| Poland      | 4802-4805-4801-4807 | PRZEWODNICZACY Komisji Bioetycznej                     | 2013/07/18/02        | 7-may-2018                 |
| Bulgaria    | 9901                | MECTHA ETHYJA KOMHCHR                                  | 109-3-010            | 7-May-2018                 |

**GLASSY participating sites**

| <i>Country</i> | <i>Site</i>                    | <i>PI</i>             |
|----------------|--------------------------------|-----------------------|
| Belgium        | JESSAZIEKENHUIS                | Edouard Benit         |
| Germany        | Kerckhoff Heart Center         | Christoph Liebetrau   |
| Belgium        | Imelda Ziekenhuis              | Luc Janssens          |
| Italy          | Policlinico San Matteo         | Maurizio Ferrario     |
| Switzerland    | Uni. Hospital Bern             | Stephan Windecker     |
| Poland         | PAKS Chrzanów                  | Zurakowski Aleksander |
| Netherlands    | Erasmus MC R'dam               | Robert Jan van Geuns  |
| Italy          | Ospedaliera S. Maria           | Marcello Dominici     |
| Austria        | Wilhelminenspital              | Kurt Huber            |
| Netherlands    | OLVG A'dam                     | Ton Slagboom          |
| Poland         | PAKS Dabrowa                   | Paweł Buszman         |
| Italy          | Ospedale S. Donato             | Leonardo Bolognese    |
| Italy          | Azienda Ospedaliero di Ferrara | Carlo Tumscitz        |
| Poland         | JP2 Krakov                     | Krzysztof Żmudka      |
| Belgium        | CHU de Charleroi               | Adel Aminian          |
| Belgium        | ZOL St.Jan                     | Mathias Vrolix        |
| Bulgaria       | City Clinic Sofia              | Ivo Petrov            |
| UK             | Royal Blackburn                | Scot Garg             |
| Germany        | Rhein Ruhr Center              | Christoph Naber       |
| Poland         | PAKS Kozle                     | Janusz Prokopczuk     |

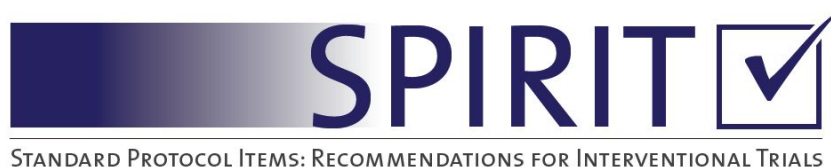

SPIRIT 2013 Checklist: Recommended items to address in a clinical trial protocol and related documents\*

| Section/item                      | ItemNo | Description                                                                                                                                                                                                                                                                              | Page  |
|-----------------------------------|--------|------------------------------------------------------------------------------------------------------------------------------------------------------------------------------------------------------------------------------------------------------------------------------------------|-------|
| <b>Administrative information</b> |        |                                                                                                                                                                                                                                                                                          |       |
| Title                             | 1      | Descriptive title identifying the study design, population, interventions, and, if applicable, trial acronym                                                                                                                                                                             | 1     |
| Trial registration                | 2a     | Trial identifier and registry name. If not yet registered, name of intended registry                                                                                                                                                                                                     | 2     |
|                                   | 2b     | All items from the World Health Organization Trial Registration Data Set                                                                                                                                                                                                                 | N.A.  |
| Protocol version                  | 3      | Date and version identifier                                                                                                                                                                                                                                                              | 3, 13 |
| Funding                           | 4      | Sources and types of financial, material, and other support                                                                                                                                                                                                                              | 17    |
| Roles and responsibilities        | 5a     | Names, affiliations, and roles of protocol contributors                                                                                                                                                                                                                                  | 1     |
|                                   | 5b     | Name and contact information for the trial sponsor                                                                                                                                                                                                                                       | 13    |
|                                   | 5c     | Role of study sponsor and funders, if any, in study design; collection, management, analysis, and interpretation of data; writing of the report; and the decision to submit the report for publication, including whether they will have ultimate authority over any of these activities | 13    |
|                                   | 5d     | Composition, roles, and responsibilities of the coordinating centre, steering committee, endpoint adjudication committee, data management team, and other individuals or groups overseeing the trial, if applicable (see Item 21a for data monitoring committee)                         | 13,14 |
| <b>Introduction</b>               |        |                                                                                                                                                                                                                                                                                          |       |
| Background and rationale          | 6a     | Description of research question and justification for undertaking the trial, including summary of relevant studies (published and unpublished) examining benefits and harms for each intervention                                                                                       | 4     |
|                                   | 6b     | Explanation for choice of comparators                                                                                                                                                                                                                                                    | N.A.  |
| Objectives                        | 7      | Specific objectives or hypotheses                                                                                                                                                                                                                                                        | 7     |

|   |              |   |                                                                               |
|---|--------------|---|-------------------------------------------------------------------------------|
| 1 |              |   |                                                                               |
| 2 | Trial design | 8 | Description of trial design including type of trial (eg, parallel group, 6-11 |
| 3 |              |   | crossover, factorial, single group), allocation ratio, and framework (eg,     |
| 4 |              |   | superiority, equivalence, noninferiority, exploratory)                        |
| 5 |              |   |                                                                               |
| 6 |              |   |                                                                               |
| 7 |              |   |                                                                               |

## 8 **Methods: Participants, interventions, and outcomes**

|    |               |     |                                                                                  |
|----|---------------|-----|----------------------------------------------------------------------------------|
| 9  |               |     |                                                                                  |
| 10 | Study setting | 9   | Description of study settings (eg, community clinic, academic hospital) 12       |
| 11 |               |     | and list of countries where data will be collected. Reference to where           |
| 12 |               |     | list of study sites can be obtained                                              |
| 13 |               |     |                                                                                  |
| 14 | Eligibility   | 10  | Inclusion and exclusion criteria for participants. If applicable, eligibility 12 |
| 15 | criteria      |     | criteria for study centres and individuals who will perform the                  |
| 16 |               |     | interventions (eg, surgeons, psychotherapists)                                   |
| 17 |               |     |                                                                                  |
| 18 |               |     |                                                                                  |
| 19 | Interventions | 11a | Interventions for each group with sufficient detail to allow replication, 6      |
| 20 |               |     | including how and when they will be administered                                 |
| 21 |               |     |                                                                                  |
| 22 |               | 11b | Criteria for discontinuing or modifying allocated interventions for a 6          |
| 23 |               |     | given trial participant (eg, drug dose change in response to harms,              |
| 24 |               |     | participant request, or improving/worsening disease)                             |
| 25 |               |     |                                                                                  |
| 26 |               | 11c | Strategies to improve adherence to intervention protocols, and any 6             |
| 27 |               |     | procedures for monitoring adherence (eg, drug tablet return,                     |
| 28 |               |     | laboratory tests)                                                                |
| 29 |               |     |                                                                                  |
| 30 |               |     |                                                                                  |
| 31 |               | 11d | Relevant concomitant care and interventions that are permitted or 6              |
| 32 |               |     | prohibited during the trial                                                      |
| 33 |               |     |                                                                                  |
| 34 | Outcomes      | 12  | Primary, secondary, and other outcomes, including the specific 7-10              |
| 35 |               |     | measurement variable (eg, systolic blood pressure), analysis metric              |
| 36 |               |     | (eg, change from baseline, final value, time to event), method of                |
| 37 |               |     | aggregation (eg, median, proportion), and time point for each                    |
| 38 |               |     | outcome. Explanation of the clinical relevance of chosen efficacy and            |
| 39 |               |     | harm outcomes is strongly recommended                                            |
| 40 |               |     |                                                                                  |
| 41 |               |     |                                                                                  |
| 42 | Participant   | 13  | Time schedule of enrolment, interventions (including any run-ins and 6           |
| 43 | timeline      |     | washouts), assessments, and visits for participants. A schematic                 |
| 44 |               |     | diagram is highly recommended (see Figure)                                       |
| 45 |               |     |                                                                                  |
| 46 |               |     |                                                                                  |
| 47 | Sample size   | 14  | Estimated number of participants needed to achieve study objectives 12           |
| 48 |               |     | and how it was determined, including clinical and statistical                    |
| 49 |               |     | assumptions supporting any sample size calculations                              |
| 50 |               |     |                                                                                  |
| 51 | Recruitment   | 15  | Strategies for achieving adequate participant enrolment to reach 12              |
| 52 |               |     | target sample size                                                               |
| 53 |               |     |                                                                                  |

## 54 **Methods: Assignment of interventions (for controlled trials)**

55 Allocation:

|    |                                                           |     |                                                                                                                                                                                                                                                                                                                                                                                                              |       |
|----|-----------------------------------------------------------|-----|--------------------------------------------------------------------------------------------------------------------------------------------------------------------------------------------------------------------------------------------------------------------------------------------------------------------------------------------------------------------------------------------------------------|-------|
| 1  |                                                           |     |                                                                                                                                                                                                                                                                                                                                                                                                              |       |
| 2  | Sequence generation                                       | 16a | Method of generating the allocation sequence (eg, computer-generated random numbers), and list of any factors for stratification. To reduce predictability of a random sequence, details of any planned restriction (eg, blocking) should be provided in a separate document that is unavailable to those who enrol participants or assign interventions                                                     | N.A.  |
| 3  |                                                           |     |                                                                                                                                                                                                                                                                                                                                                                                                              |       |
| 4  |                                                           |     |                                                                                                                                                                                                                                                                                                                                                                                                              |       |
| 5  |                                                           |     |                                                                                                                                                                                                                                                                                                                                                                                                              |       |
| 6  |                                                           |     |                                                                                                                                                                                                                                                                                                                                                                                                              |       |
| 7  |                                                           |     |                                                                                                                                                                                                                                                                                                                                                                                                              |       |
| 8  |                                                           |     |                                                                                                                                                                                                                                                                                                                                                                                                              |       |
| 9  |                                                           |     |                                                                                                                                                                                                                                                                                                                                                                                                              |       |
| 10 | Allocation concealment mechanism                          | 16b | Mechanism of implementing the allocation sequence (eg, central telephone; sequentially numbered, opaque, sealed envelopes), describing any steps to conceal the sequence until interventions are assigned                                                                                                                                                                                                    | N.A.  |
| 11 |                                                           |     |                                                                                                                                                                                                                                                                                                                                                                                                              |       |
| 12 |                                                           |     |                                                                                                                                                                                                                                                                                                                                                                                                              |       |
| 13 |                                                           |     |                                                                                                                                                                                                                                                                                                                                                                                                              |       |
| 14 |                                                           |     |                                                                                                                                                                                                                                                                                                                                                                                                              |       |
| 15 |                                                           |     |                                                                                                                                                                                                                                                                                                                                                                                                              |       |
| 16 |                                                           |     |                                                                                                                                                                                                                                                                                                                                                                                                              |       |
| 17 | Implementation                                            | 16c | Who will generate the allocation sequence, who will enrol participants, and who will assign participants to interventions                                                                                                                                                                                                                                                                                    | N.A.  |
| 18 |                                                           |     |                                                                                                                                                                                                                                                                                                                                                                                                              |       |
| 19 |                                                           |     |                                                                                                                                                                                                                                                                                                                                                                                                              |       |
| 20 | Blinding (masking)                                        | 17a | Who will be blinded after assignment to interventions (eg, trial participants, care providers, outcome assessors, data analysts), and how                                                                                                                                                                                                                                                                    | 10-11 |
| 21 |                                                           |     |                                                                                                                                                                                                                                                                                                                                                                                                              |       |
| 22 |                                                           |     |                                                                                                                                                                                                                                                                                                                                                                                                              |       |
| 23 |                                                           |     |                                                                                                                                                                                                                                                                                                                                                                                                              |       |
| 24 |                                                           | 17b | If blinded, circumstances under which unblinding is permissible, and procedure for revealing a participant's allocated intervention during the trial                                                                                                                                                                                                                                                         | 10-11 |
| 25 |                                                           |     |                                                                                                                                                                                                                                                                                                                                                                                                              |       |
| 26 |                                                           |     |                                                                                                                                                                                                                                                                                                                                                                                                              |       |
| 27 |                                                           |     |                                                                                                                                                                                                                                                                                                                                                                                                              |       |
| 28 |                                                           |     |                                                                                                                                                                                                                                                                                                                                                                                                              |       |
| 29 | <b>Methods: Data collection, management, and analysis</b> |     |                                                                                                                                                                                                                                                                                                                                                                                                              |       |
| 30 |                                                           |     |                                                                                                                                                                                                                                                                                                                                                                                                              |       |
| 31 | Data collection methods                                   | 18a | Plans for assessment and collection of outcome, baseline, and other trial data, including any related processes to promote data quality (eg, duplicate measurements, training of assessors) and a description of study instruments (eg, questionnaires, laboratory tests) along with their reliability and validity, if known. Reference to where data collection forms can be found, if not in the protocol | 7-11  |
| 32 |                                                           |     |                                                                                                                                                                                                                                                                                                                                                                                                              |       |
| 33 |                                                           |     |                                                                                                                                                                                                                                                                                                                                                                                                              |       |
| 34 |                                                           |     |                                                                                                                                                                                                                                                                                                                                                                                                              |       |
| 35 |                                                           |     |                                                                                                                                                                                                                                                                                                                                                                                                              |       |
| 36 |                                                           |     |                                                                                                                                                                                                                                                                                                                                                                                                              |       |
| 37 |                                                           |     |                                                                                                                                                                                                                                                                                                                                                                                                              |       |
| 38 |                                                           |     |                                                                                                                                                                                                                                                                                                                                                                                                              |       |
| 39 |                                                           | 18b | Plans to promote participant retention and complete follow-up, including list of any outcome data to be collected for participants who discontinue or deviate from intervention protocols                                                                                                                                                                                                                    | 10-11 |
| 40 |                                                           |     |                                                                                                                                                                                                                                                                                                                                                                                                              |       |
| 41 |                                                           |     |                                                                                                                                                                                                                                                                                                                                                                                                              |       |
| 42 |                                                           |     |                                                                                                                                                                                                                                                                                                                                                                                                              |       |
| 43 |                                                           |     |                                                                                                                                                                                                                                                                                                                                                                                                              |       |
| 44 | Data management                                           | 19  | Plans for data entry, coding, security, and storage, including any related processes to promote data quality (eg, double data entry; range checks for data values). Reference to where details of data management procedures can be found, if not in the protocol                                                                                                                                            | 10-11 |
| 45 |                                                           |     |                                                                                                                                                                                                                                                                                                                                                                                                              |       |
| 46 |                                                           |     |                                                                                                                                                                                                                                                                                                                                                                                                              |       |
| 47 |                                                           |     |                                                                                                                                                                                                                                                                                                                                                                                                              |       |
| 48 |                                                           |     |                                                                                                                                                                                                                                                                                                                                                                                                              |       |
| 49 | Statistical methods                                       | 20a | Statistical methods for analysing primary and secondary outcomes. Reference to where other details of the statistical analysis plan can be found, if not in the protocol                                                                                                                                                                                                                                     | 11    |
| 50 |                                                           |     |                                                                                                                                                                                                                                                                                                                                                                                                              |       |
| 51 |                                                           |     |                                                                                                                                                                                                                                                                                                                                                                                                              |       |
| 52 |                                                           |     |                                                                                                                                                                                                                                                                                                                                                                                                              |       |
| 53 |                                                           |     |                                                                                                                                                                                                                                                                                                                                                                                                              |       |
| 54 |                                                           | 20b | Methods for any additional analyses (eg, subgroup and adjusted analyses)                                                                                                                                                                                                                                                                                                                                     | 11    |
| 55 |                                                           |     |                                                                                                                                                                                                                                                                                                                                                                                                              |       |
| 56 |                                                           |     |                                                                                                                                                                                                                                                                                                                                                                                                              |       |
| 57 |                                                           | 20c | Definition of analysis population relating to protocol non-adherence (eg, as randomised analysis), and any statistical methods to handle missing data (eg, multiple imputation)                                                                                                                                                                                                                              | 11    |
| 58 |                                                           |     |                                                                                                                                                                                                                                                                                                                                                                                                              |       |
| 59 |                                                           |     |                                                                                                                                                                                                                                                                                                                                                                                                              |       |
| 60 |                                                           |     |                                                                                                                                                                                                                                                                                                                                                                                                              |       |



**Methods: Monitoring**

|                 |     |                                                                                                                                                                                                                                                                                                                                       |      |
|-----------------|-----|---------------------------------------------------------------------------------------------------------------------------------------------------------------------------------------------------------------------------------------------------------------------------------------------------------------------------------------|------|
| Data monitoring | 21a | Composition of data monitoring committee (DMC); summary of its role and reporting structure; statement of whether it is independent from the sponsor and competing interests; and reference to where further details about its charter can be found, if not in the protocol. Alternatively, an explanation of why a DMC is not needed | N.A. |
|                 | 21b | Description of any interim analyses and stopping guidelines, including who will have access to these interim results and make the final decision to terminate the trial                                                                                                                                                               | N.A. |
| Harms           | 22  | Plans for collecting, assessing, reporting, and managing solicited and spontaneously reported adverse events and other unintended effects of trial interventions or trial conduct                                                                                                                                                     | 7-11 |
| Auditing        | 23  | Frequency and procedures for auditing trial conduct, if any, and whether the process will be independent from investigators and the sponsor                                                                                                                                                                                           | 7-11 |

**Ethics and dissemination**

|                               |     |                                                                                                                                                                                                                                  |       |
|-------------------------------|-----|----------------------------------------------------------------------------------------------------------------------------------------------------------------------------------------------------------------------------------|-------|
| Research ethics approval      | 24  | Plans for seeking research ethics committee/institutional review board (REC/IRB) approval                                                                                                                                        | 13    |
| Protocol amendments           | 25  | Plans for communicating important protocol modifications (eg, changes to eligibility criteria, outcomes, analyses) to relevant parties (eg, investigators, REC/IRBs, trial participants, trial registries, journals, regulators) | 13    |
| Consent or assent             | 26a | Who will obtain informed consent or assent from potential trial participants or authorised surrogates, and how (see Item 32)                                                                                                     | 13    |
|                               | 26b | Additional consent provisions for collection and use of participant data and biological specimens in ancillary studies, if applicable                                                                                            | 13    |
| Confidentiality               | 27  | How personal information about potential and enrolled participants will be collected, shared, and maintained in order to protect confidentiality before, during, and after the trial                                             | 13    |
| Declaration of interests      | 28  | Financial and other competing interests for principal investigators for the overall trial and each study site                                                                                                                    | 17    |
| Access to data                | 29  | Statement of who will have access to the final trial dataset, and disclosure of contractual agreements that limit such access for investigators                                                                                  | 13-14 |
| Ancillary and post-trial care | 30  | Provisions, if any, for ancillary and post-trial care, and for compensation to those who suffer harm from trial participation                                                                                                    | N.A.  |

|    |                      |     |                                                                                                                                                                                                                                                                                     |    |
|----|----------------------|-----|-------------------------------------------------------------------------------------------------------------------------------------------------------------------------------------------------------------------------------------------------------------------------------------|----|
| 1  |                      |     |                                                                                                                                                                                                                                                                                     |    |
| 2  | Dissemination policy | 31a | Plans for investigators and sponsor to communicate trial results to participants, healthcare professionals, the public, and other relevant groups (eg, via publication, reporting in results databases, or other data sharing arrangements), including any publication restrictions | 13 |
| 3  |                      |     |                                                                                                                                                                                                                                                                                     |    |
| 4  |                      |     |                                                                                                                                                                                                                                                                                     |    |
| 5  |                      |     |                                                                                                                                                                                                                                                                                     |    |
| 6  |                      |     |                                                                                                                                                                                                                                                                                     |    |
| 7  |                      | 31b | Authorship eligibility guidelines and any intended use of professional writers                                                                                                                                                                                                      | 13 |
| 8  |                      |     |                                                                                                                                                                                                                                                                                     |    |
| 9  |                      |     |                                                                                                                                                                                                                                                                                     |    |
| 10 |                      | 31c | Plans, if any, for granting public access to the full protocol, participant-level dataset, and statistical code                                                                                                                                                                     | 13 |
| 11 |                      |     |                                                                                                                                                                                                                                                                                     |    |
| 12 |                      |     |                                                                                                                                                                                                                                                                                     |    |
| 13 |                      |     |                                                                                                                                                                                                                                                                                     |    |

## Appendices

|    |                            |    |                                                                                                                                                                                                |          |
|----|----------------------------|----|------------------------------------------------------------------------------------------------------------------------------------------------------------------------------------------------|----------|
| 14 |                            |    |                                                                                                                                                                                                |          |
| 15 |                            |    |                                                                                                                                                                                                |          |
| 16 | Informed consent materials | 32 | Model consent form and other related documentation given to participants and authorised surrogates                                                                                             | Appendix |
| 17 |                            |    |                                                                                                                                                                                                |          |
| 18 |                            |    |                                                                                                                                                                                                |          |
| 19 |                            |    |                                                                                                                                                                                                |          |
| 20 | Biological specimens       | 33 | Plans for collection, laboratory evaluation, and storage of biological specimens for genetic or molecular analysis in the current trial and for future use in ancillary studies, if applicable | N.A.     |
| 21 |                            |    |                                                                                                                                                                                                |          |
| 22 |                            |    |                                                                                                                                                                                                |          |
| 23 |                            |    |                                                                                                                                                                                                |          |
| 24 |                            |    |                                                                                                                                                                                                |          |

\*It is strongly recommended that this checklist be read in conjunction with the SPIRIT 2013 Explanation & Elaboration for important clarification on the items. Amendments to the protocol should be tracked and dated. The SPIRIT checklist is copyrighted by the SPIRIT Group under the Creative Commons "[Attribution-NonCommercial-NoDerivs 3.0 Unported](https://creativecommons.org/licenses/by-nc-nd/3.0/)" license.
